# Supplementary material for: A simple synthesis of N-perfluoroacylated and N-acylated glycals of neuraminic acid with a cyclic aminic substituent at the 4α position as possible inhibitors of sialidases
Source: Royal Society of Chemistry journal article supplement (doi:10.1039/c2ob07015d), 2012-01-01

**A Simple Synthesis of *N*-Perfluoroacylated and *N*-Acylated Glycals of Neuraminic Acid with a Cyclic Aminic Substituent at 4 $\alpha$  Position as Possible Inhibitors of Sialidases.**

*Paola Rota\**, *Pietro Allevi*, *Irene S. Agnolin*, *Roberto Mattina*, *Nadia Papini* and *Mario Anastasia*

Department of Medical Chemistry, Biochemistry and Biotechnology  
University of Milan. Via Saldini 50-I-20133-Milano (Italy)

Fax: (+39) 0250316040

E-mail: [paola.rota@unimi.it](mailto:paola.rota@unimi.it)

***Supporting Information***

<sup>1</sup>H/<sup>13</sup>C-NMR spectra for compounds **9**, **10**, **11,12**, **13a-c**, **14a-c**, **16a-c**, **17a-c**,  
**6a-d**, **7a-d**.

S-2- S-49

<sup>1</sup>H NMR

Compound 9

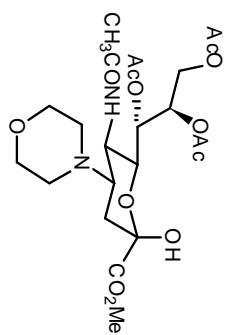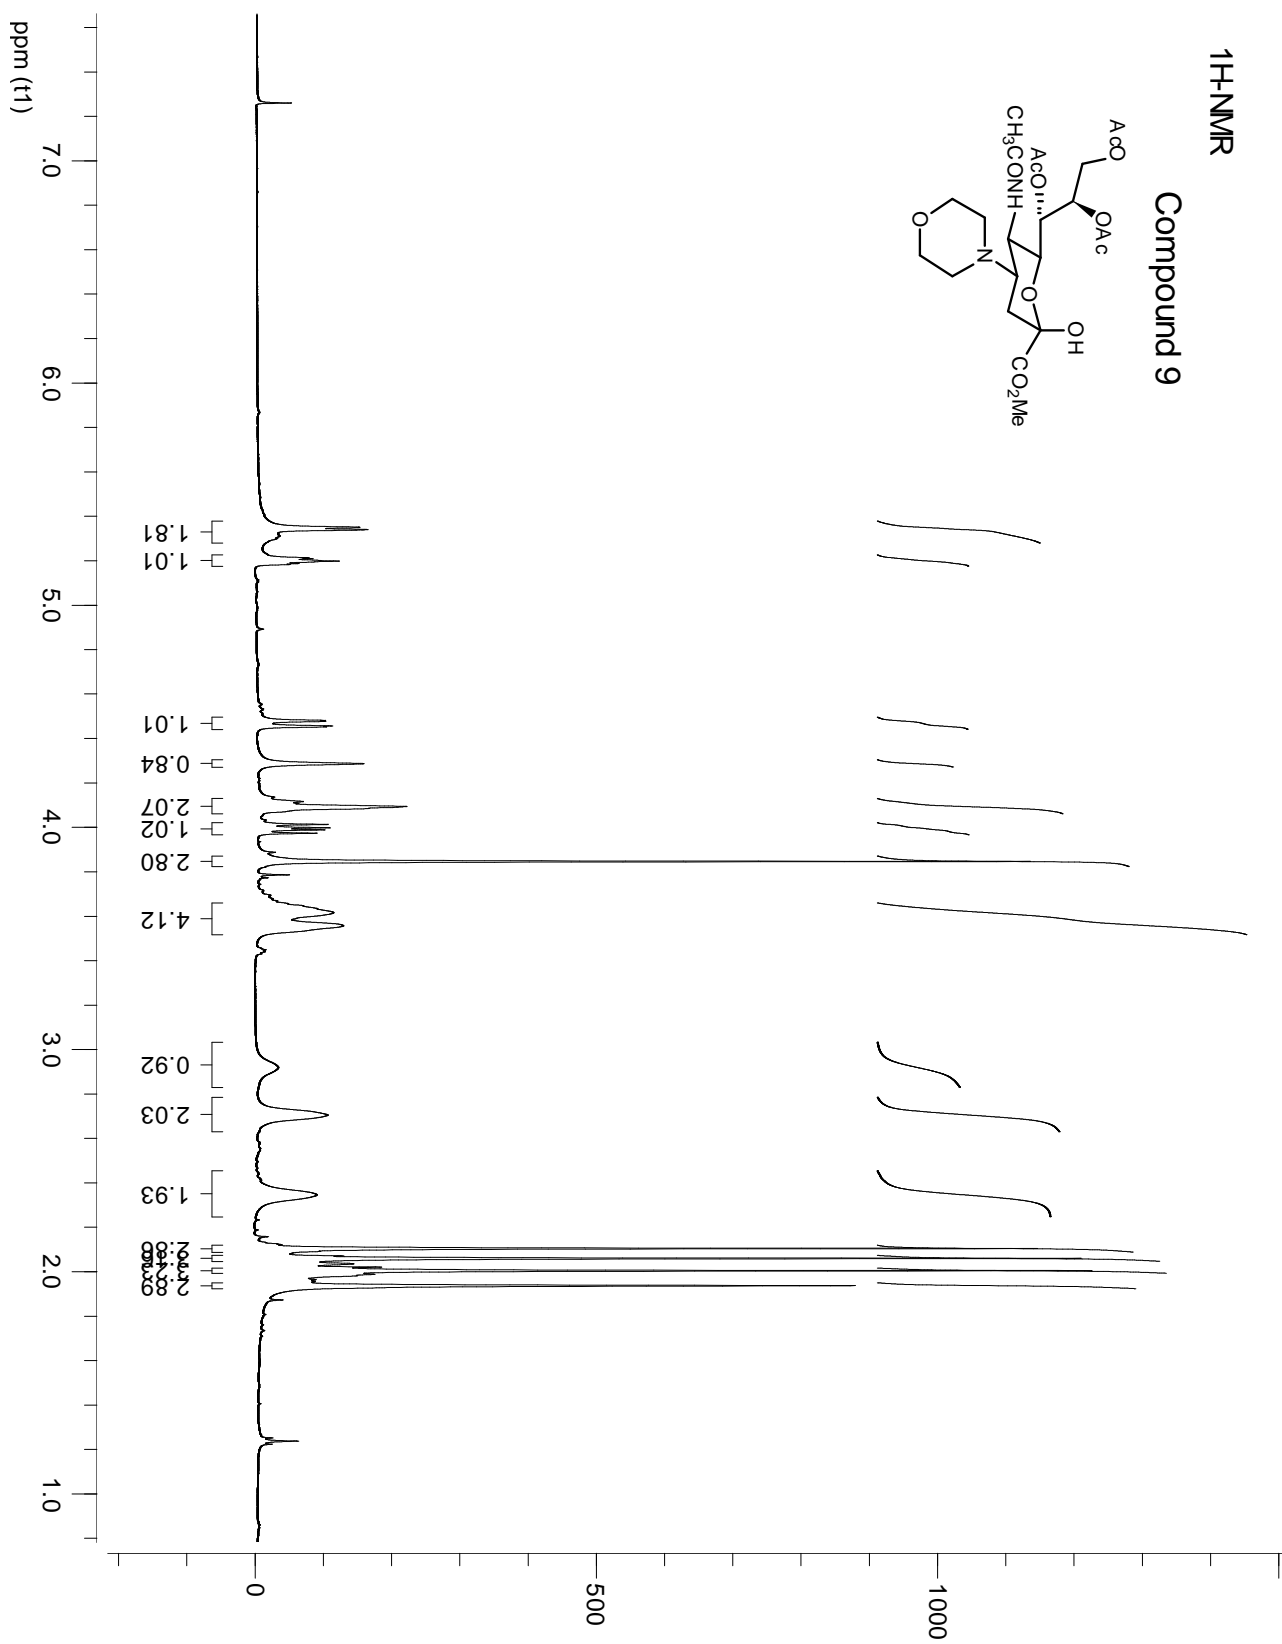

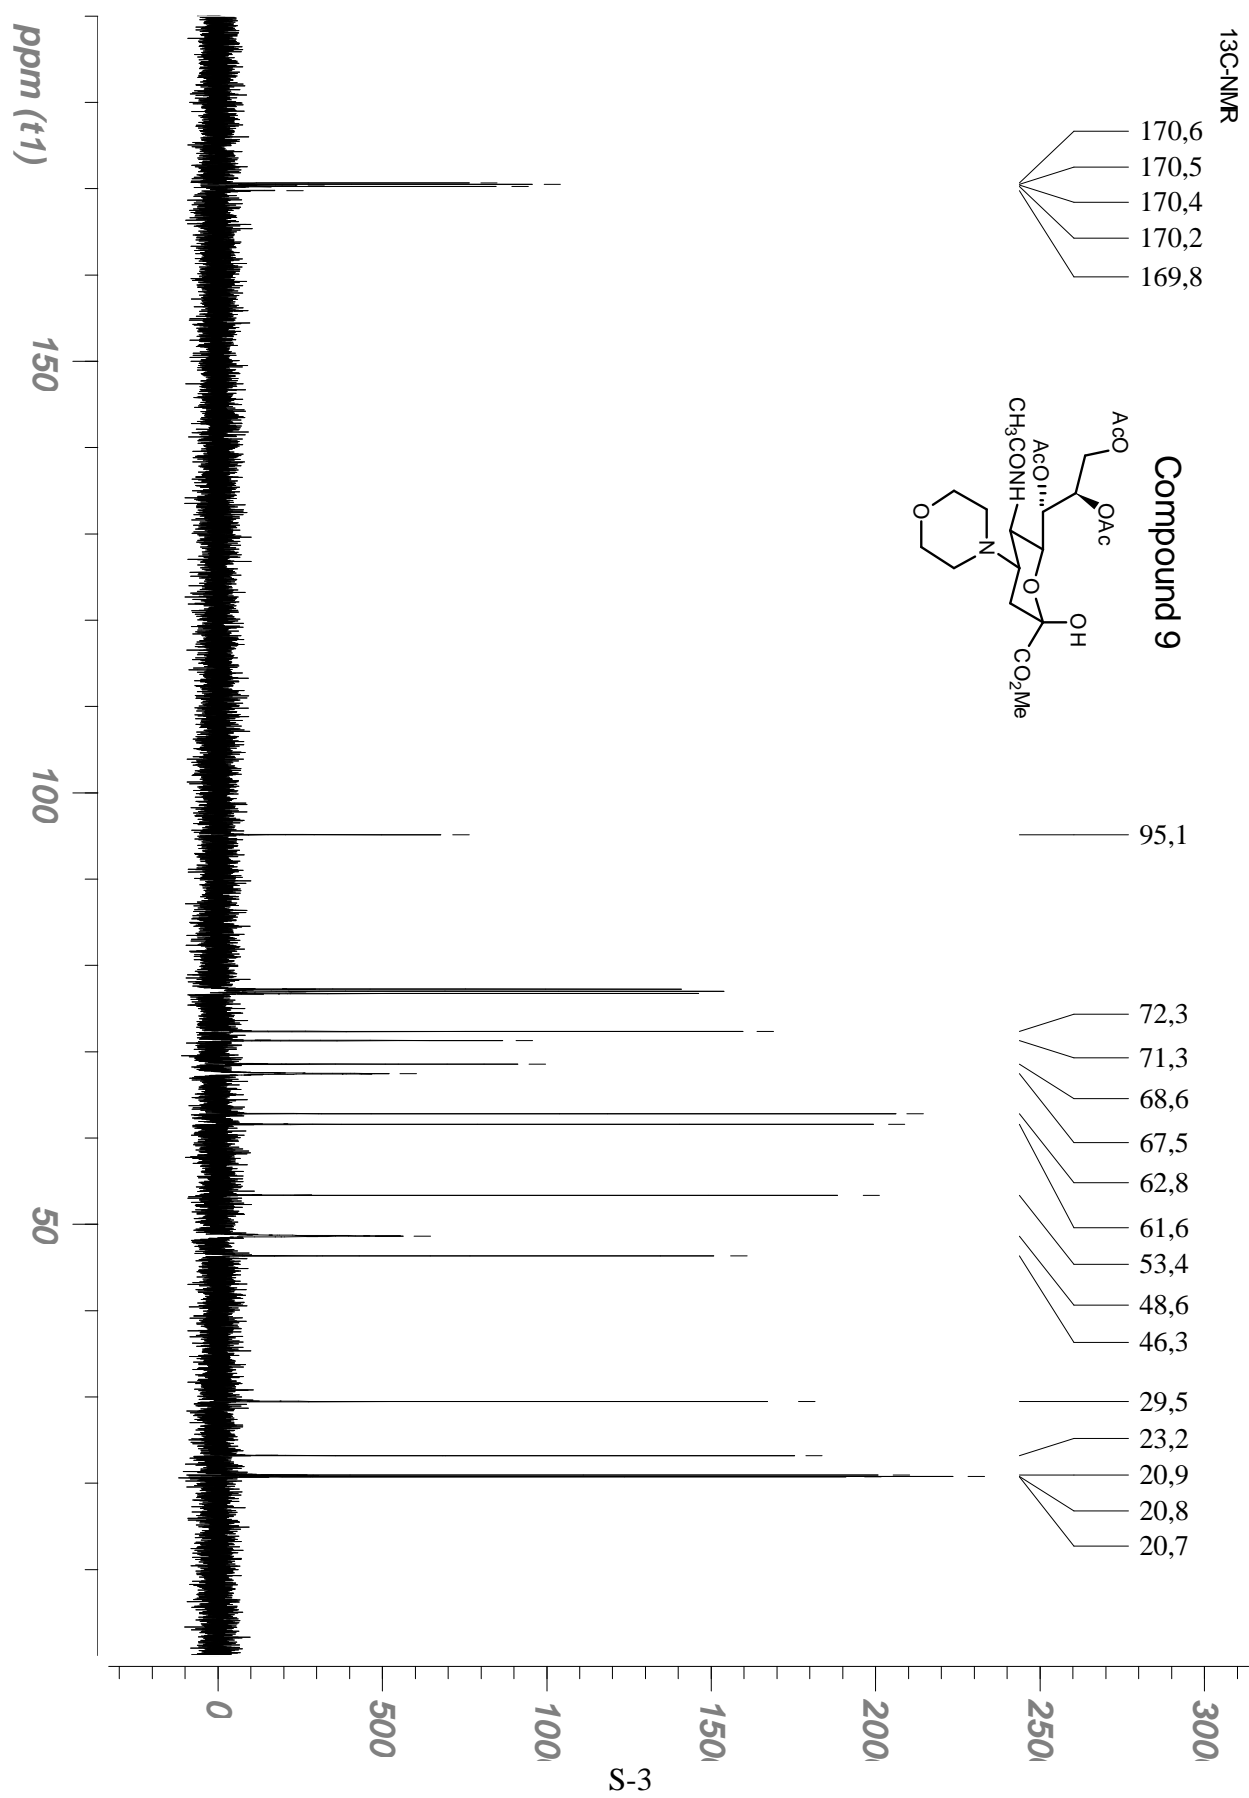

<sup>1</sup>H-NMR

Compound 10

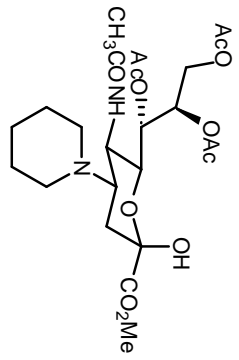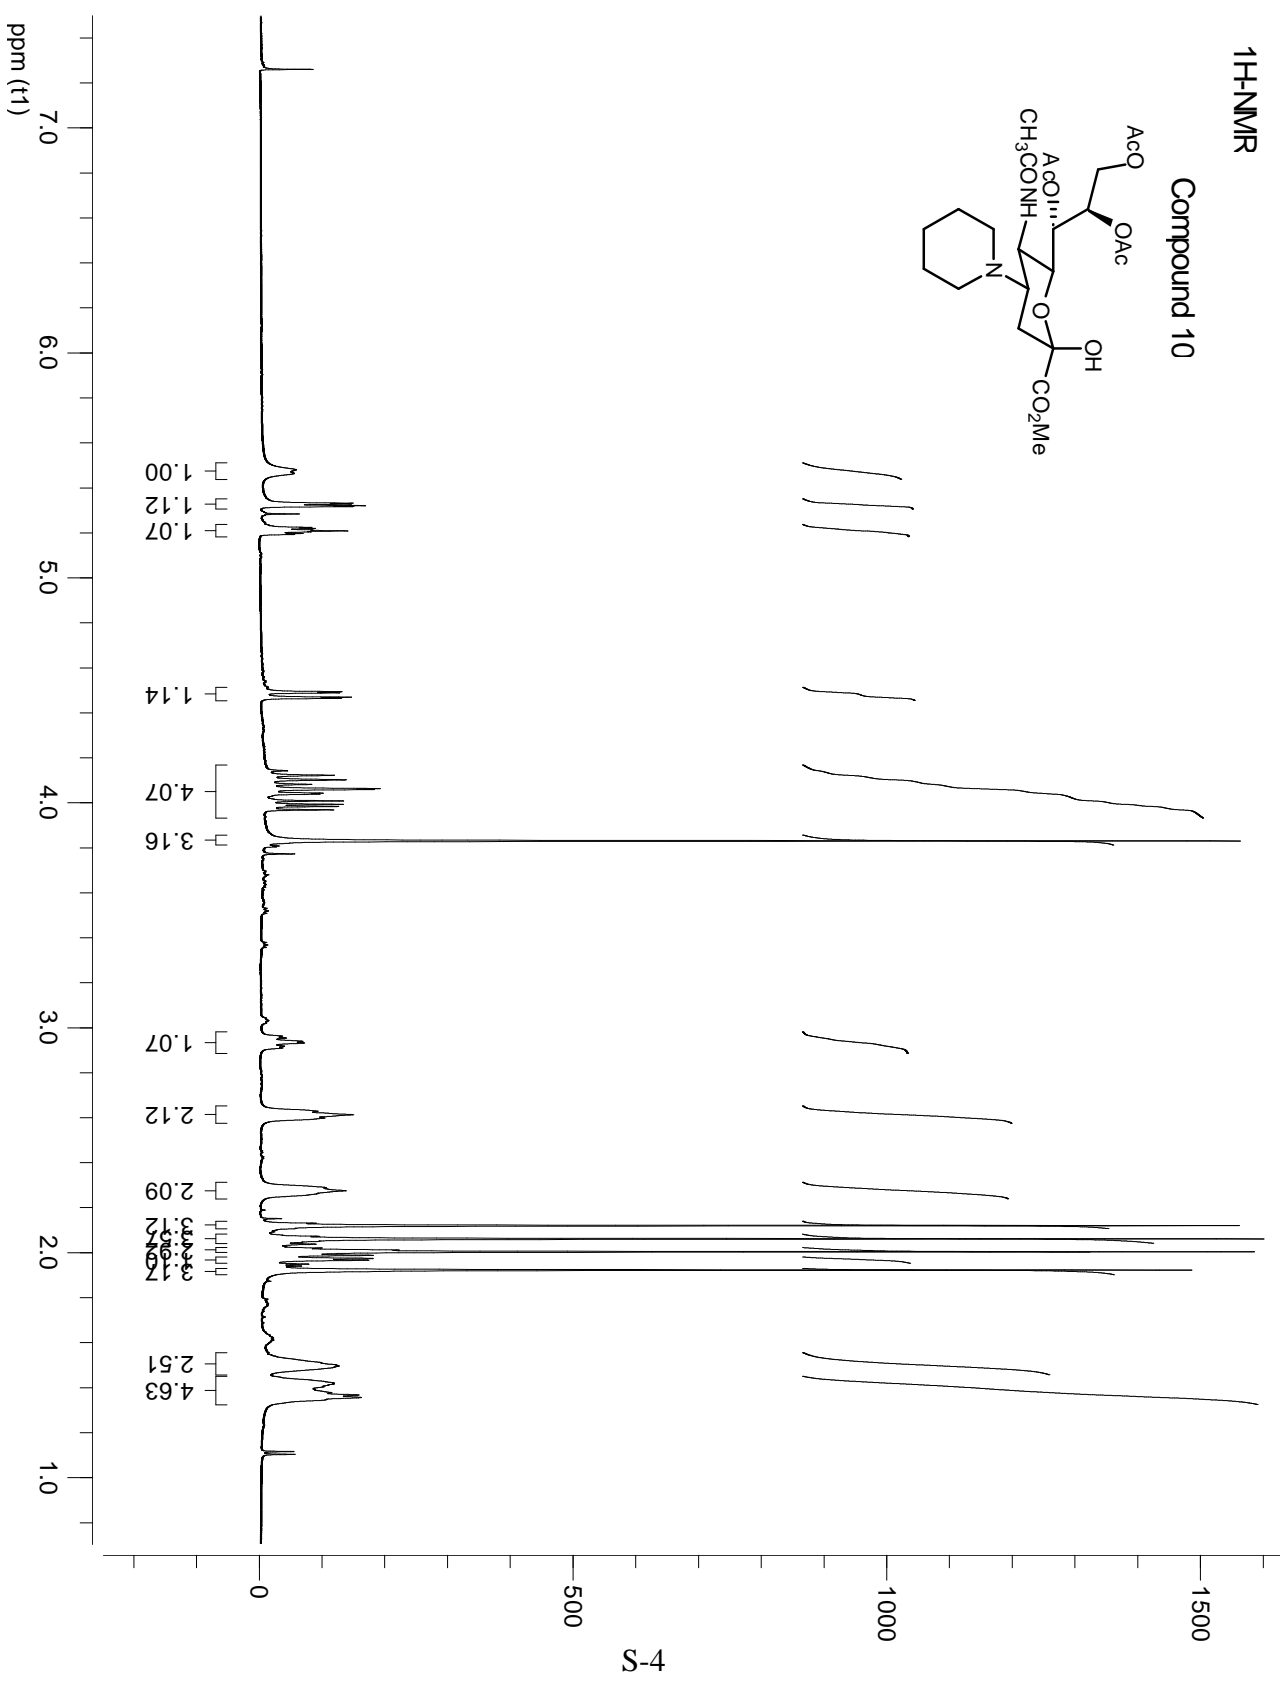

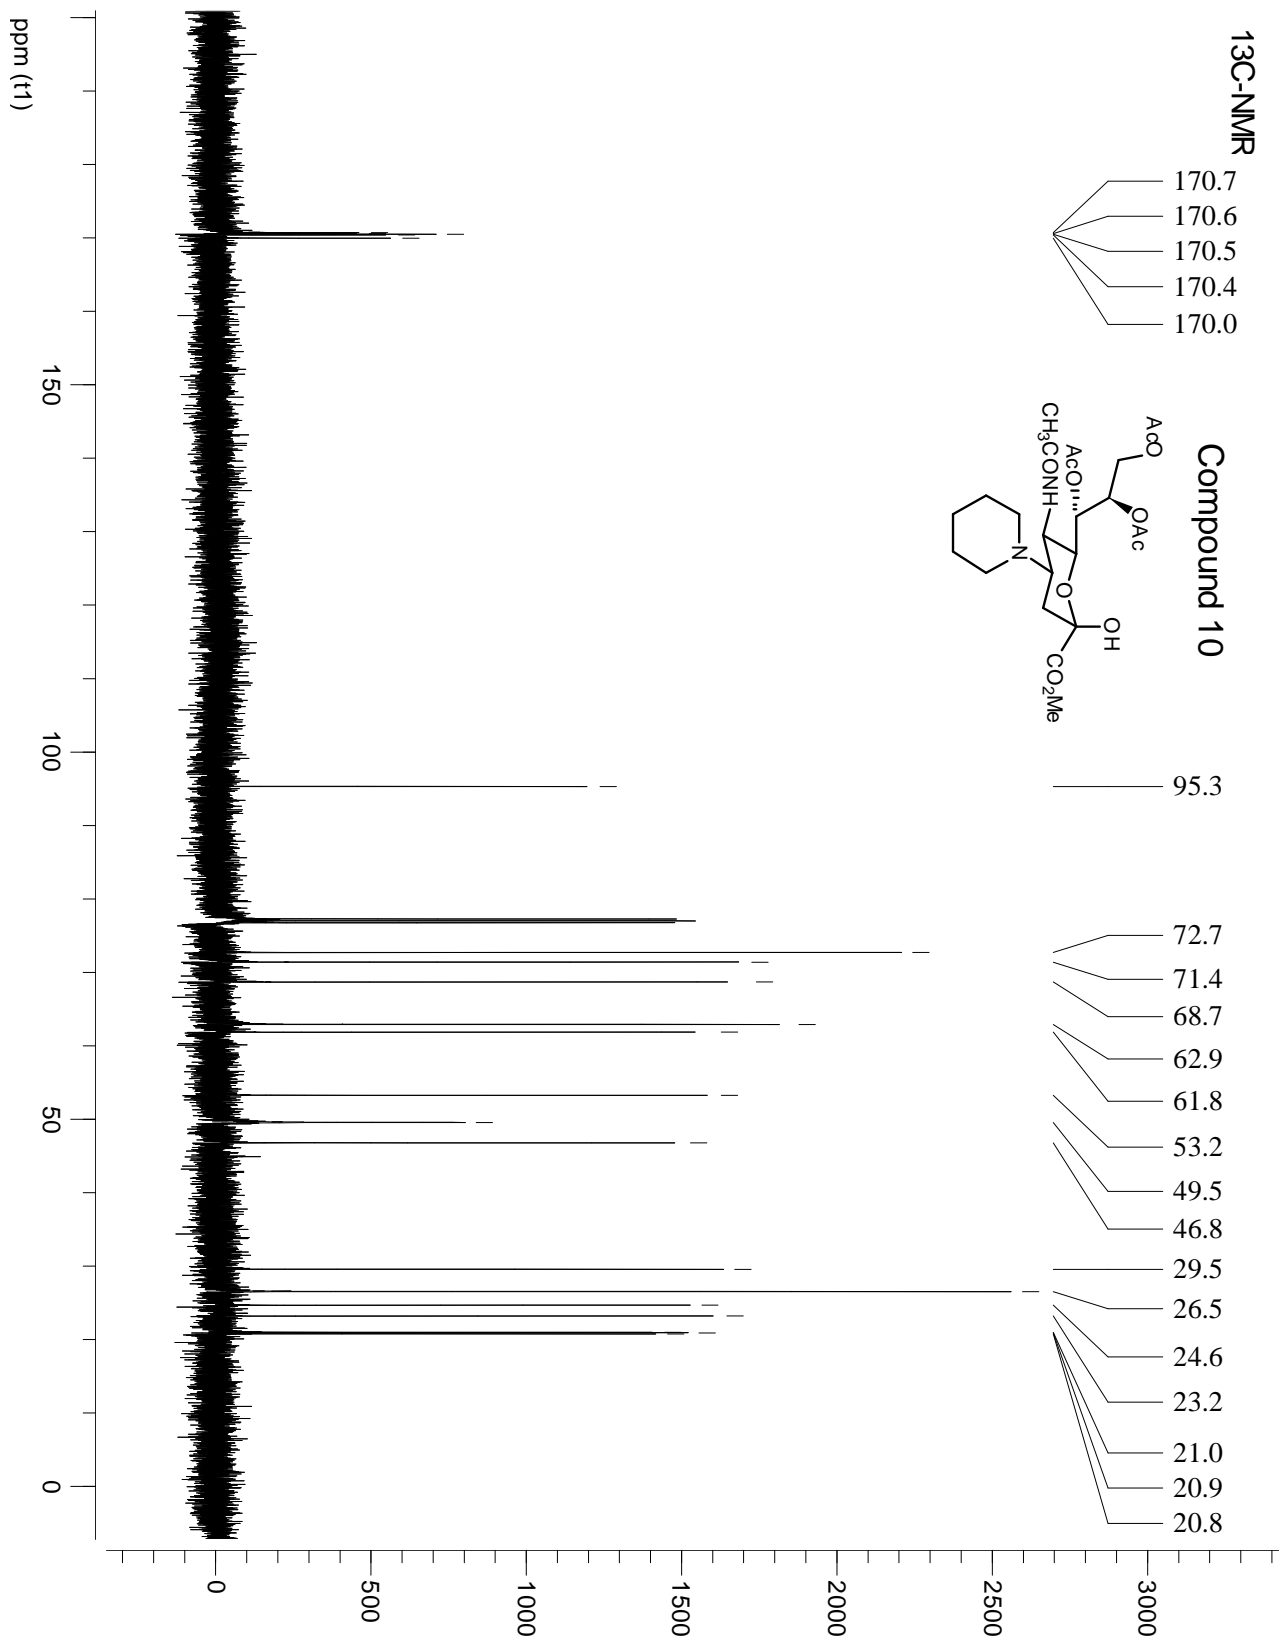

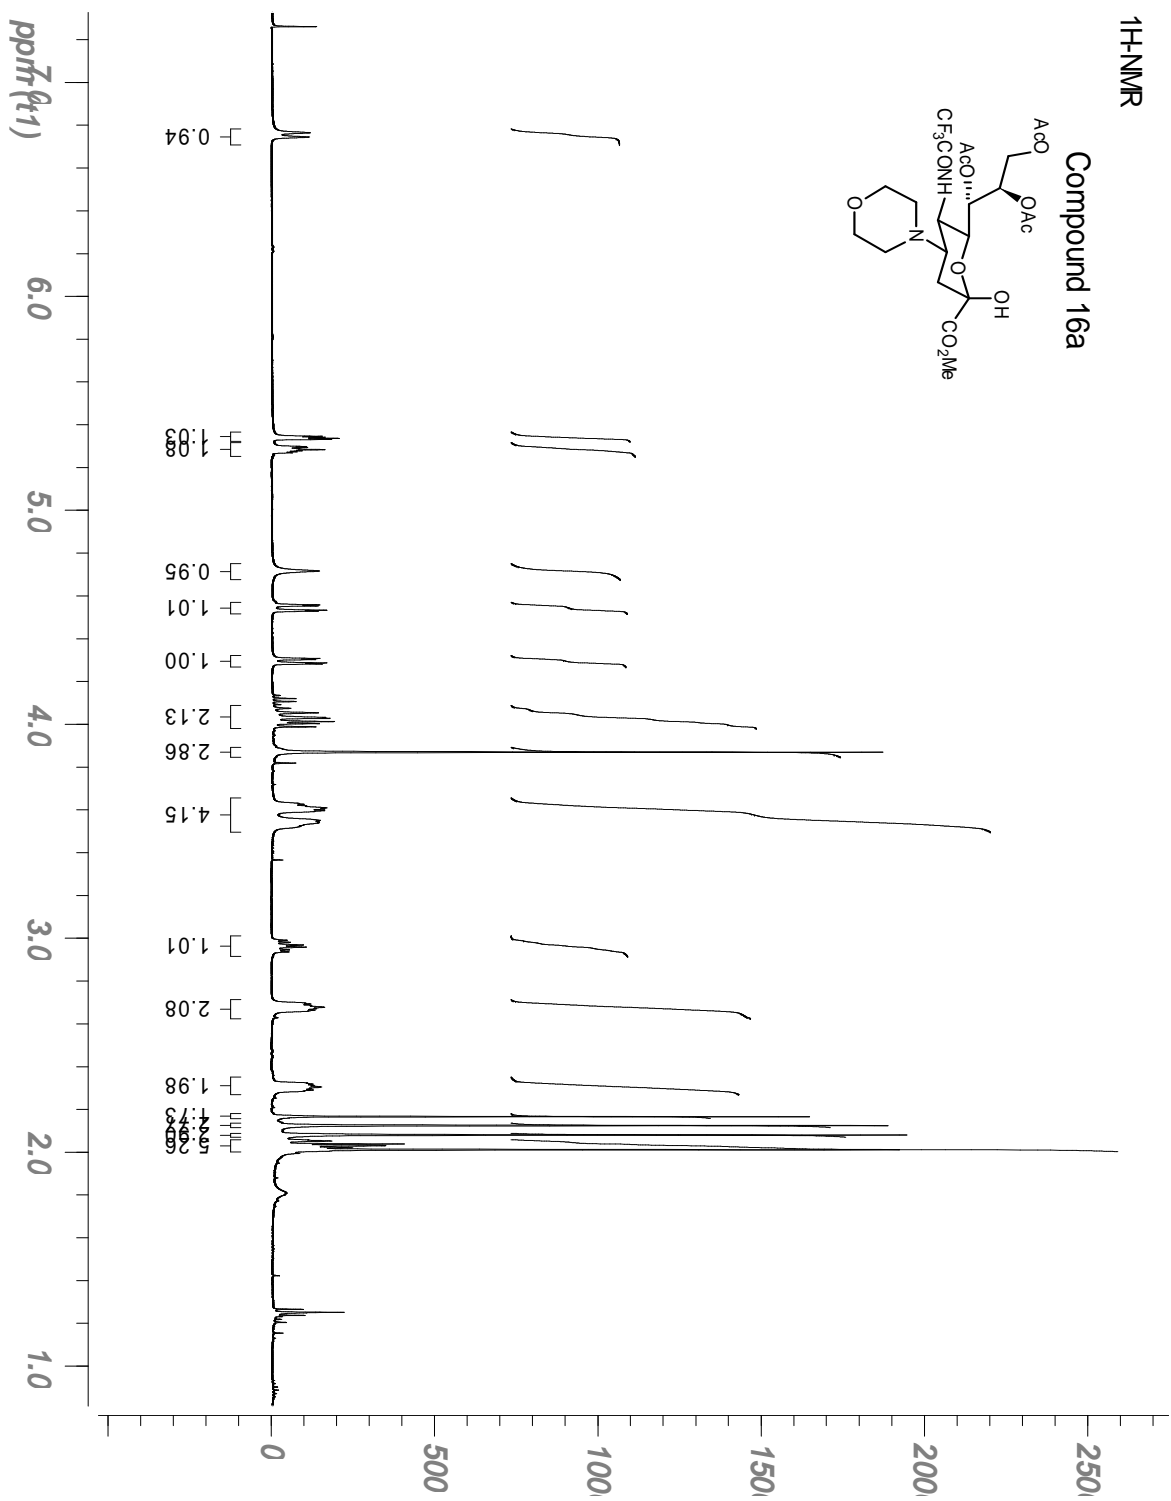

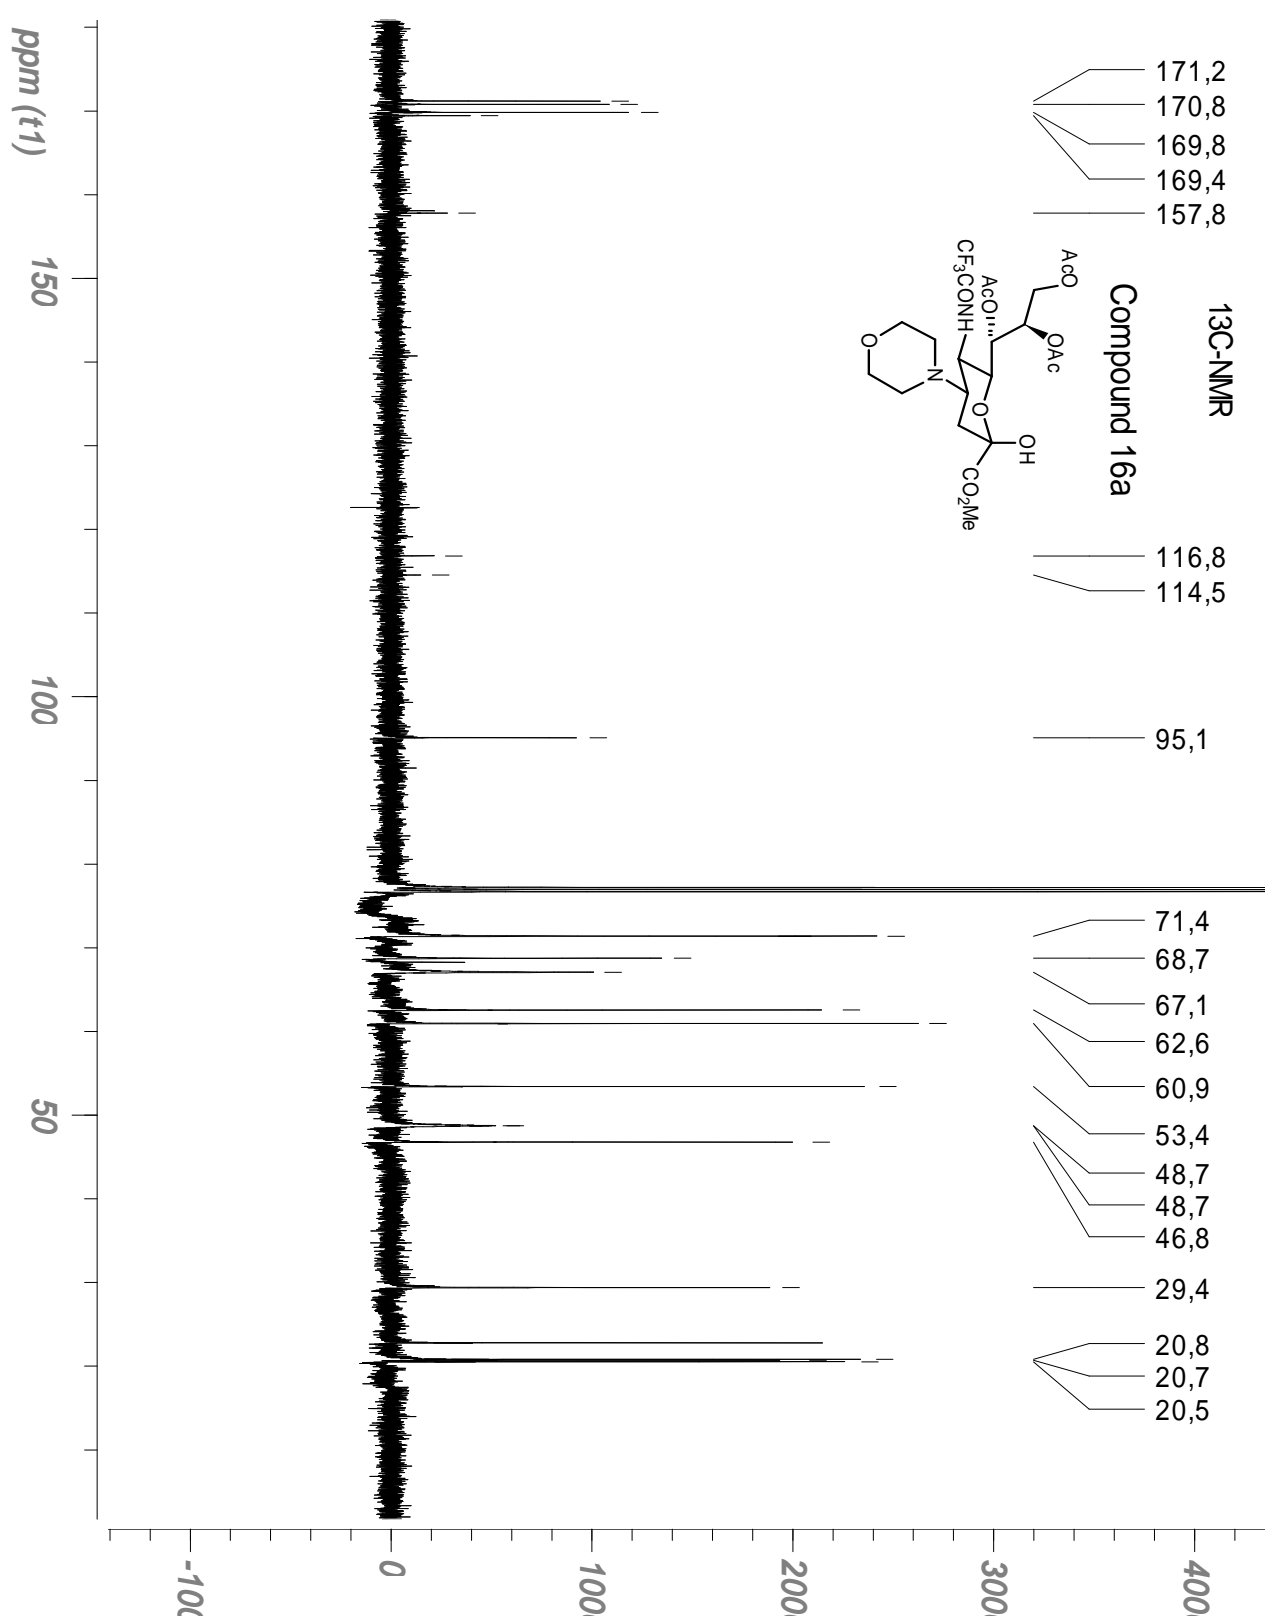

<sup>1</sup>H-NMR

Compound 17a

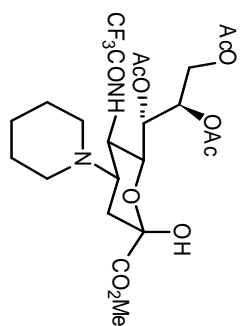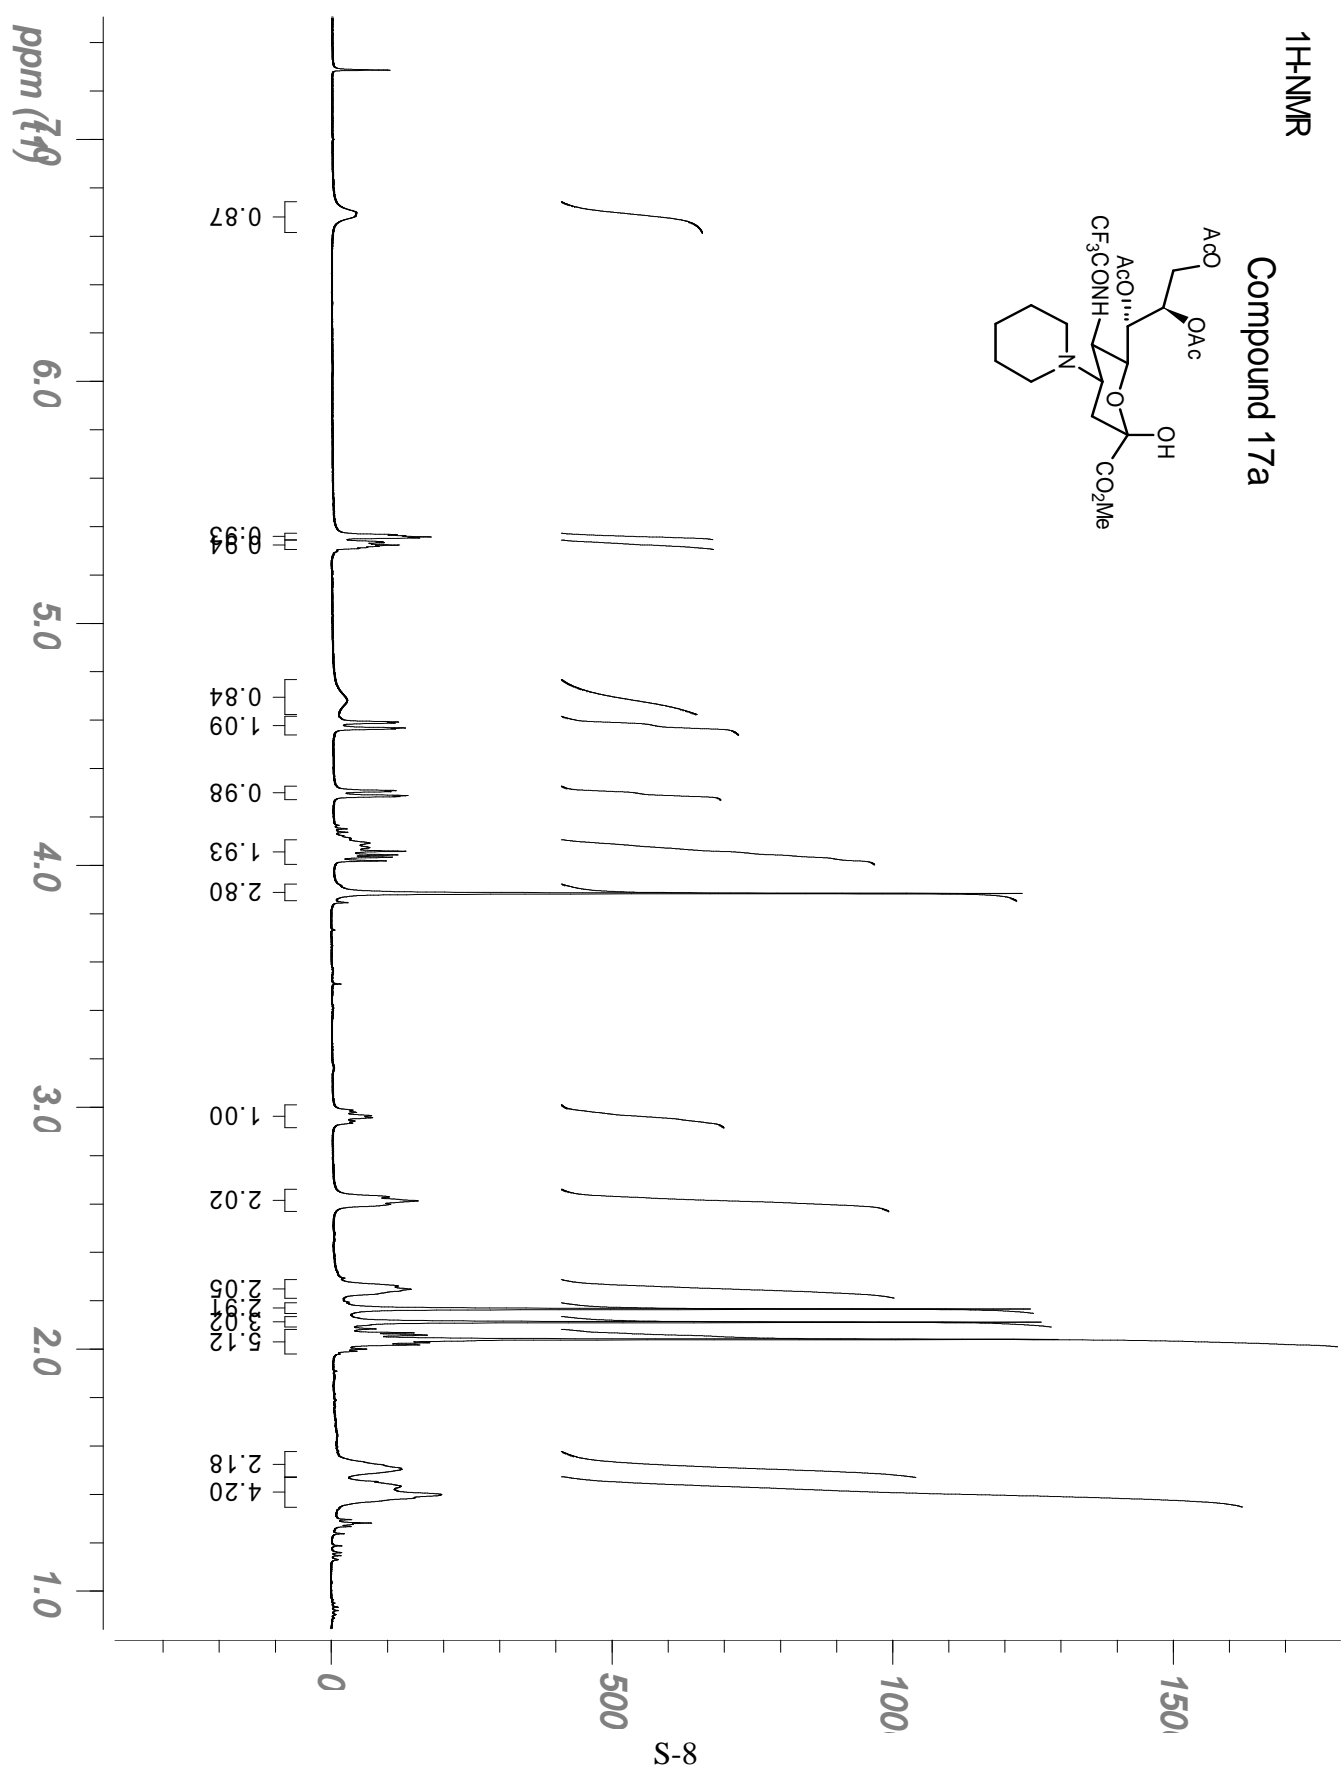



<sup>13</sup>C-NMR

171,3  
170,9  
170,0  
169,8  
158,1  
157,8

Compound 17a

117,0  
114,7  
106,9  
95,4

72,0  
71,7  
69,0  
62,7  
61,4  
53,4  
49,8  
47,3

29,6  
26,5  
24,7  
20,9  
20,8  
20,7

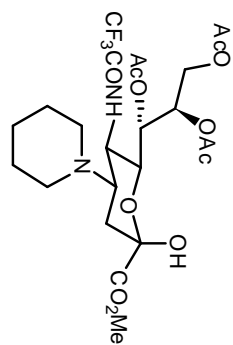

ppm (*t*1)

150

100

50

0

0

500

<sup>1</sup>H-NMR  
Compound 19b

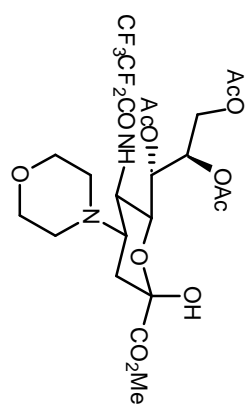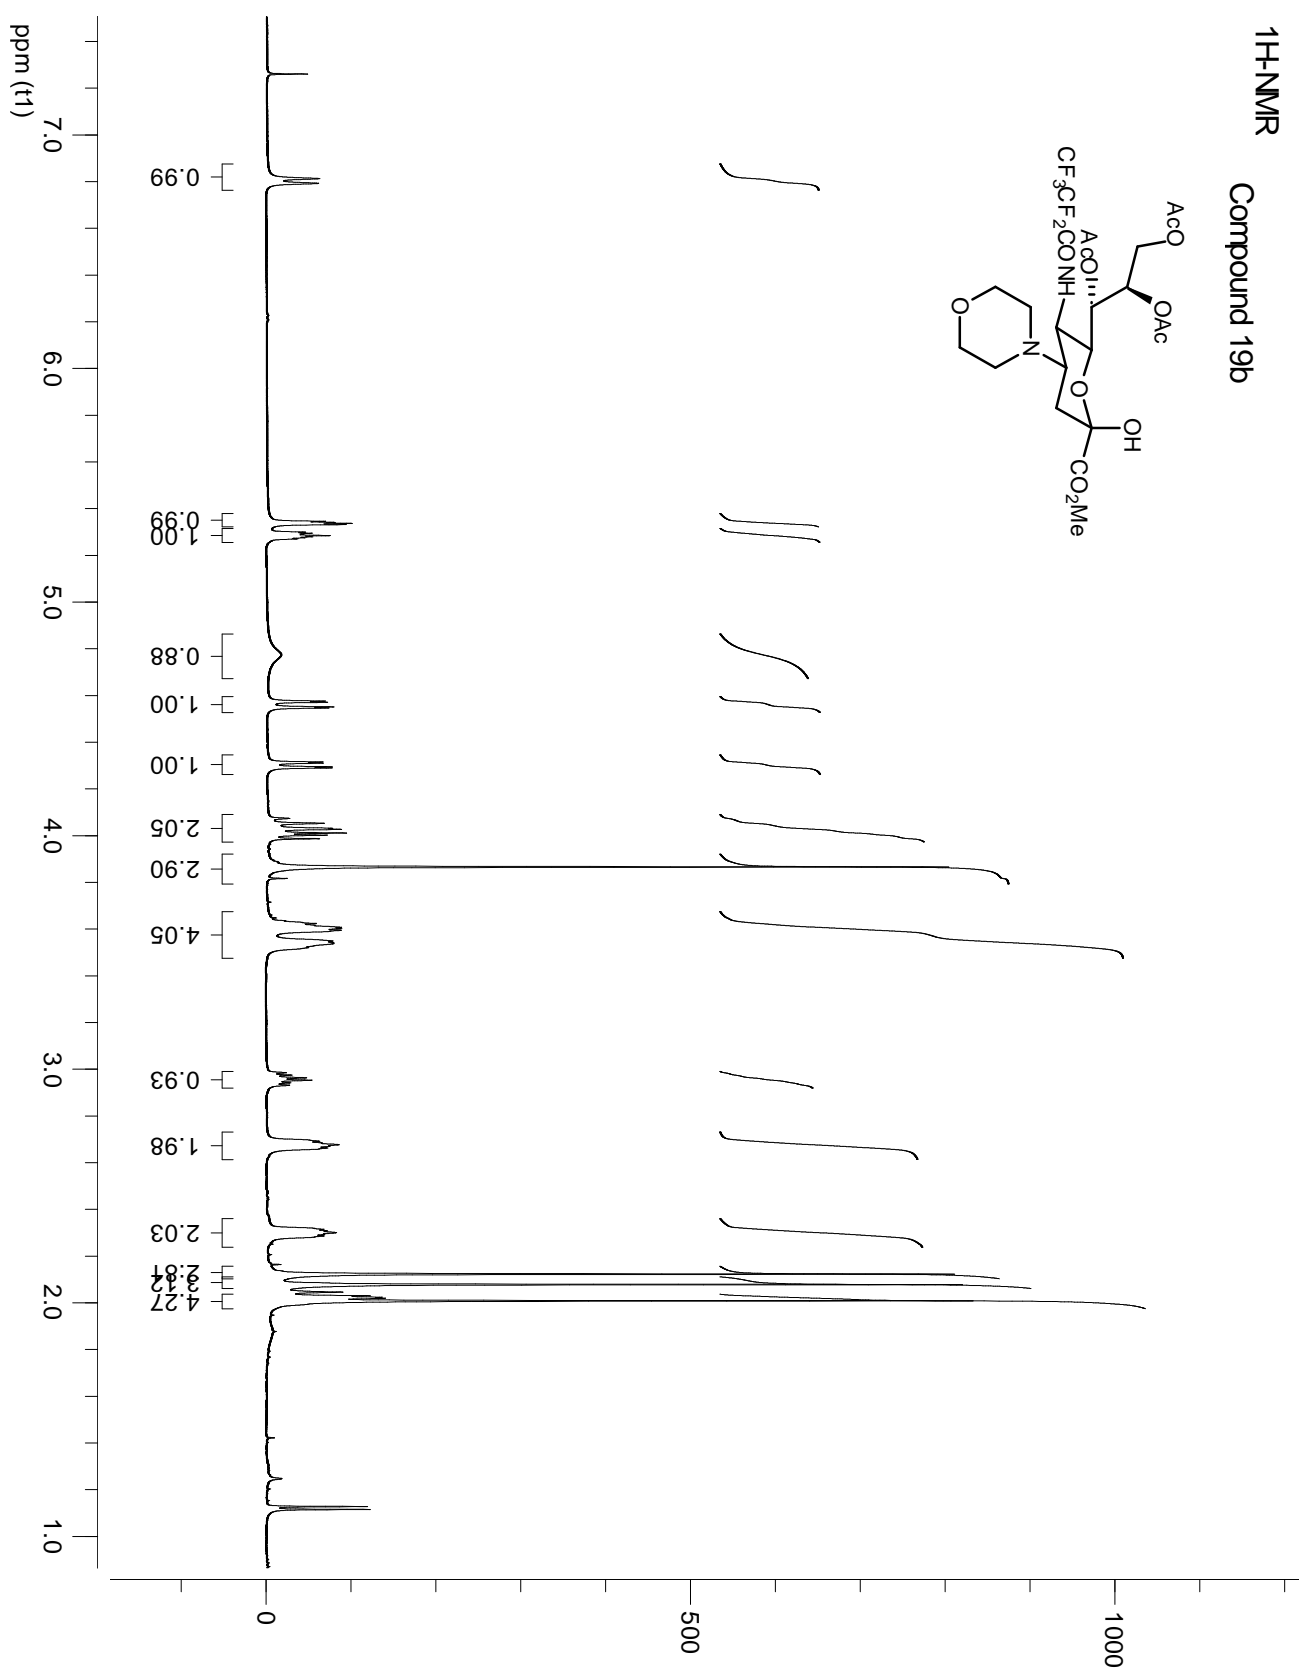

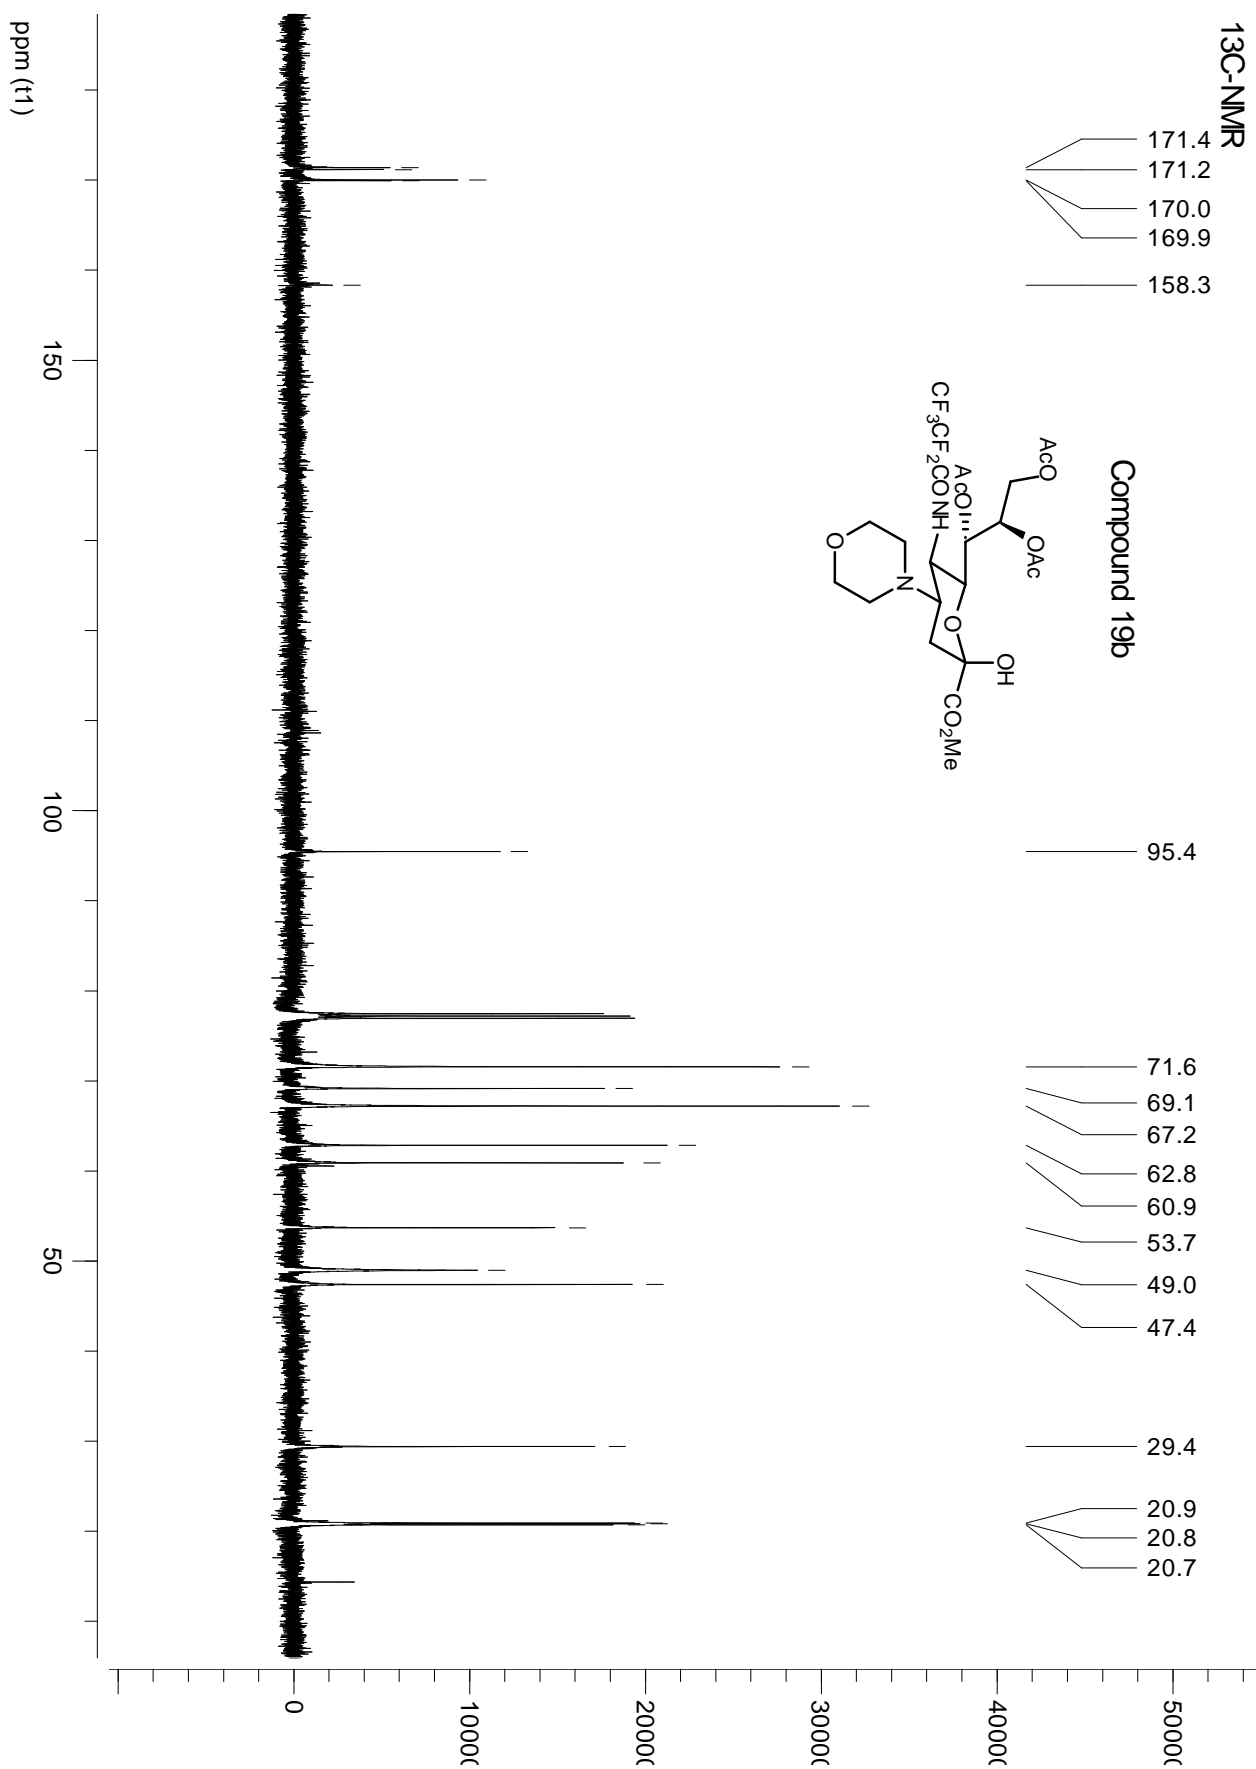

**<sup>1</sup>H-NMR**  
Compound 17b

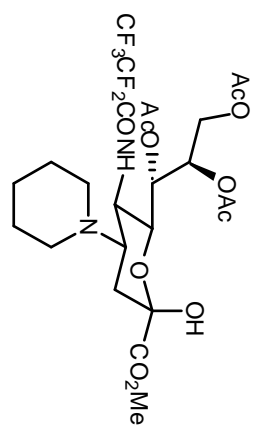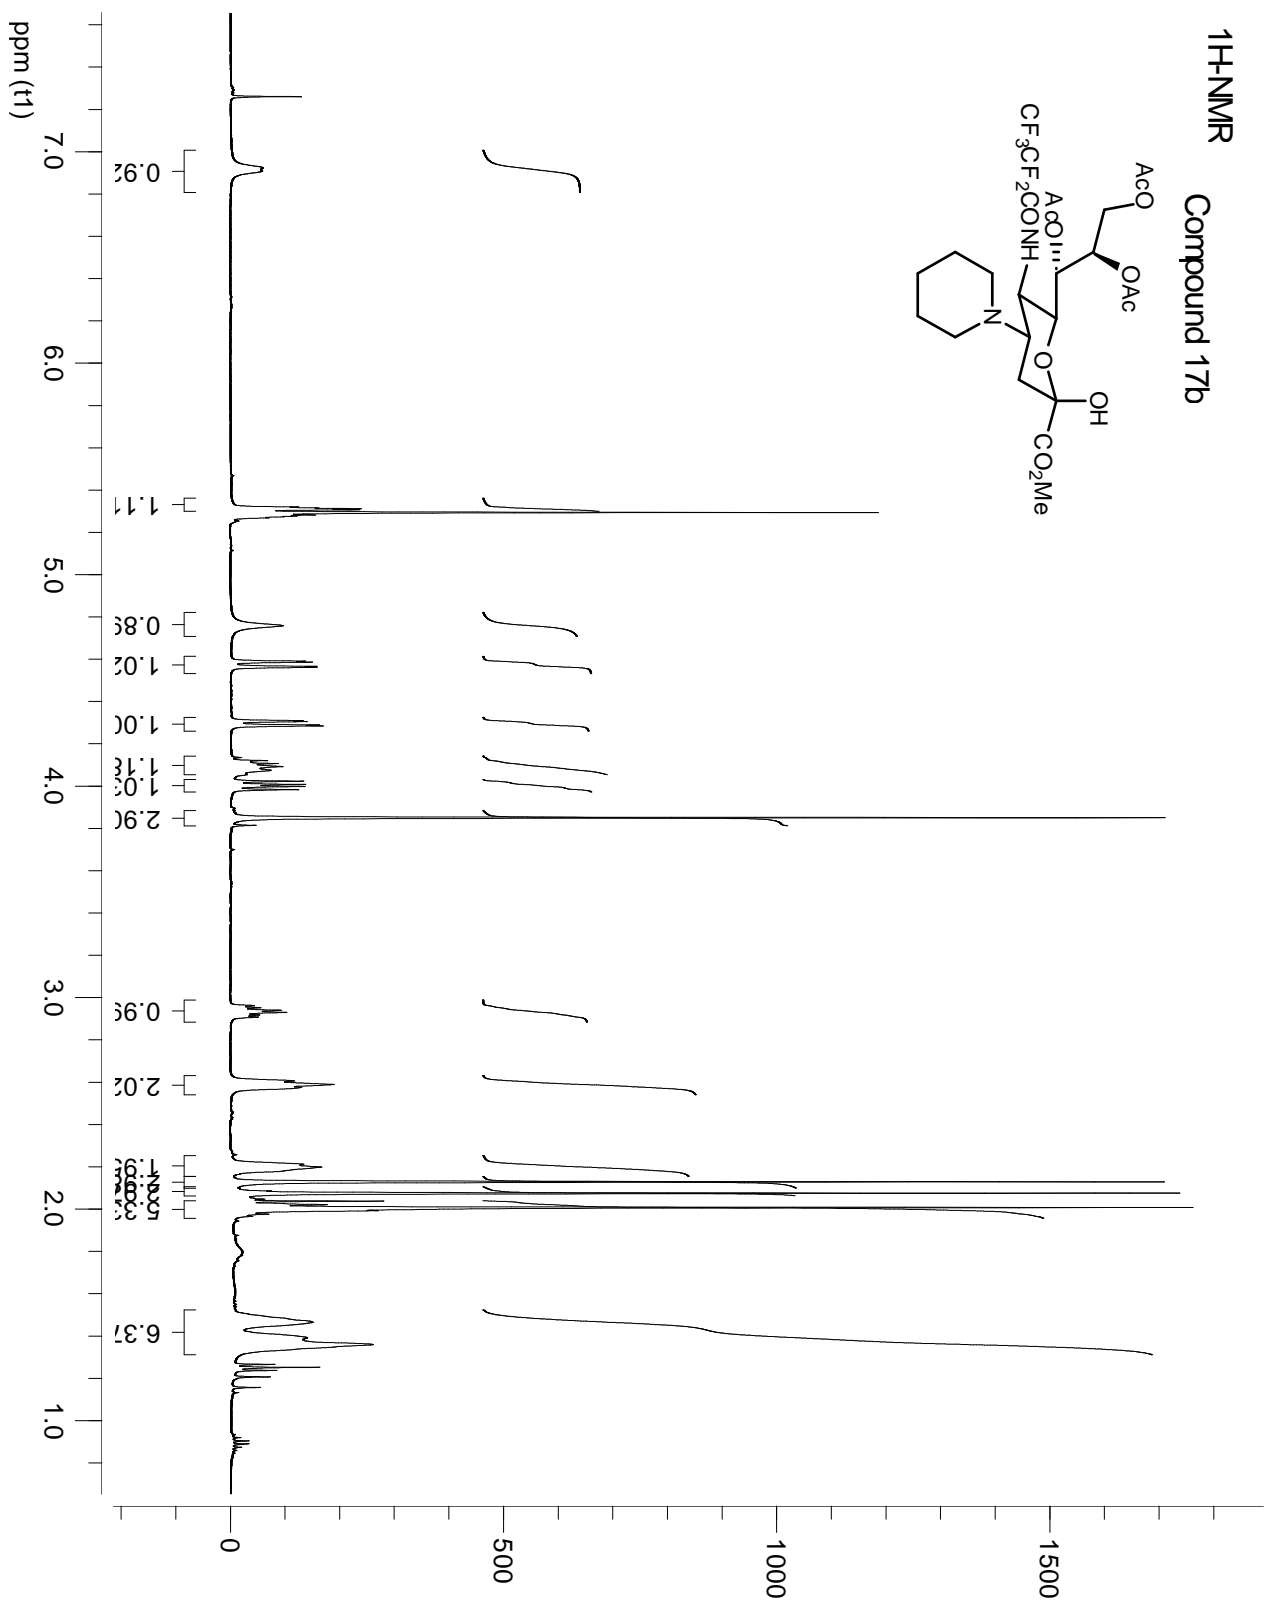

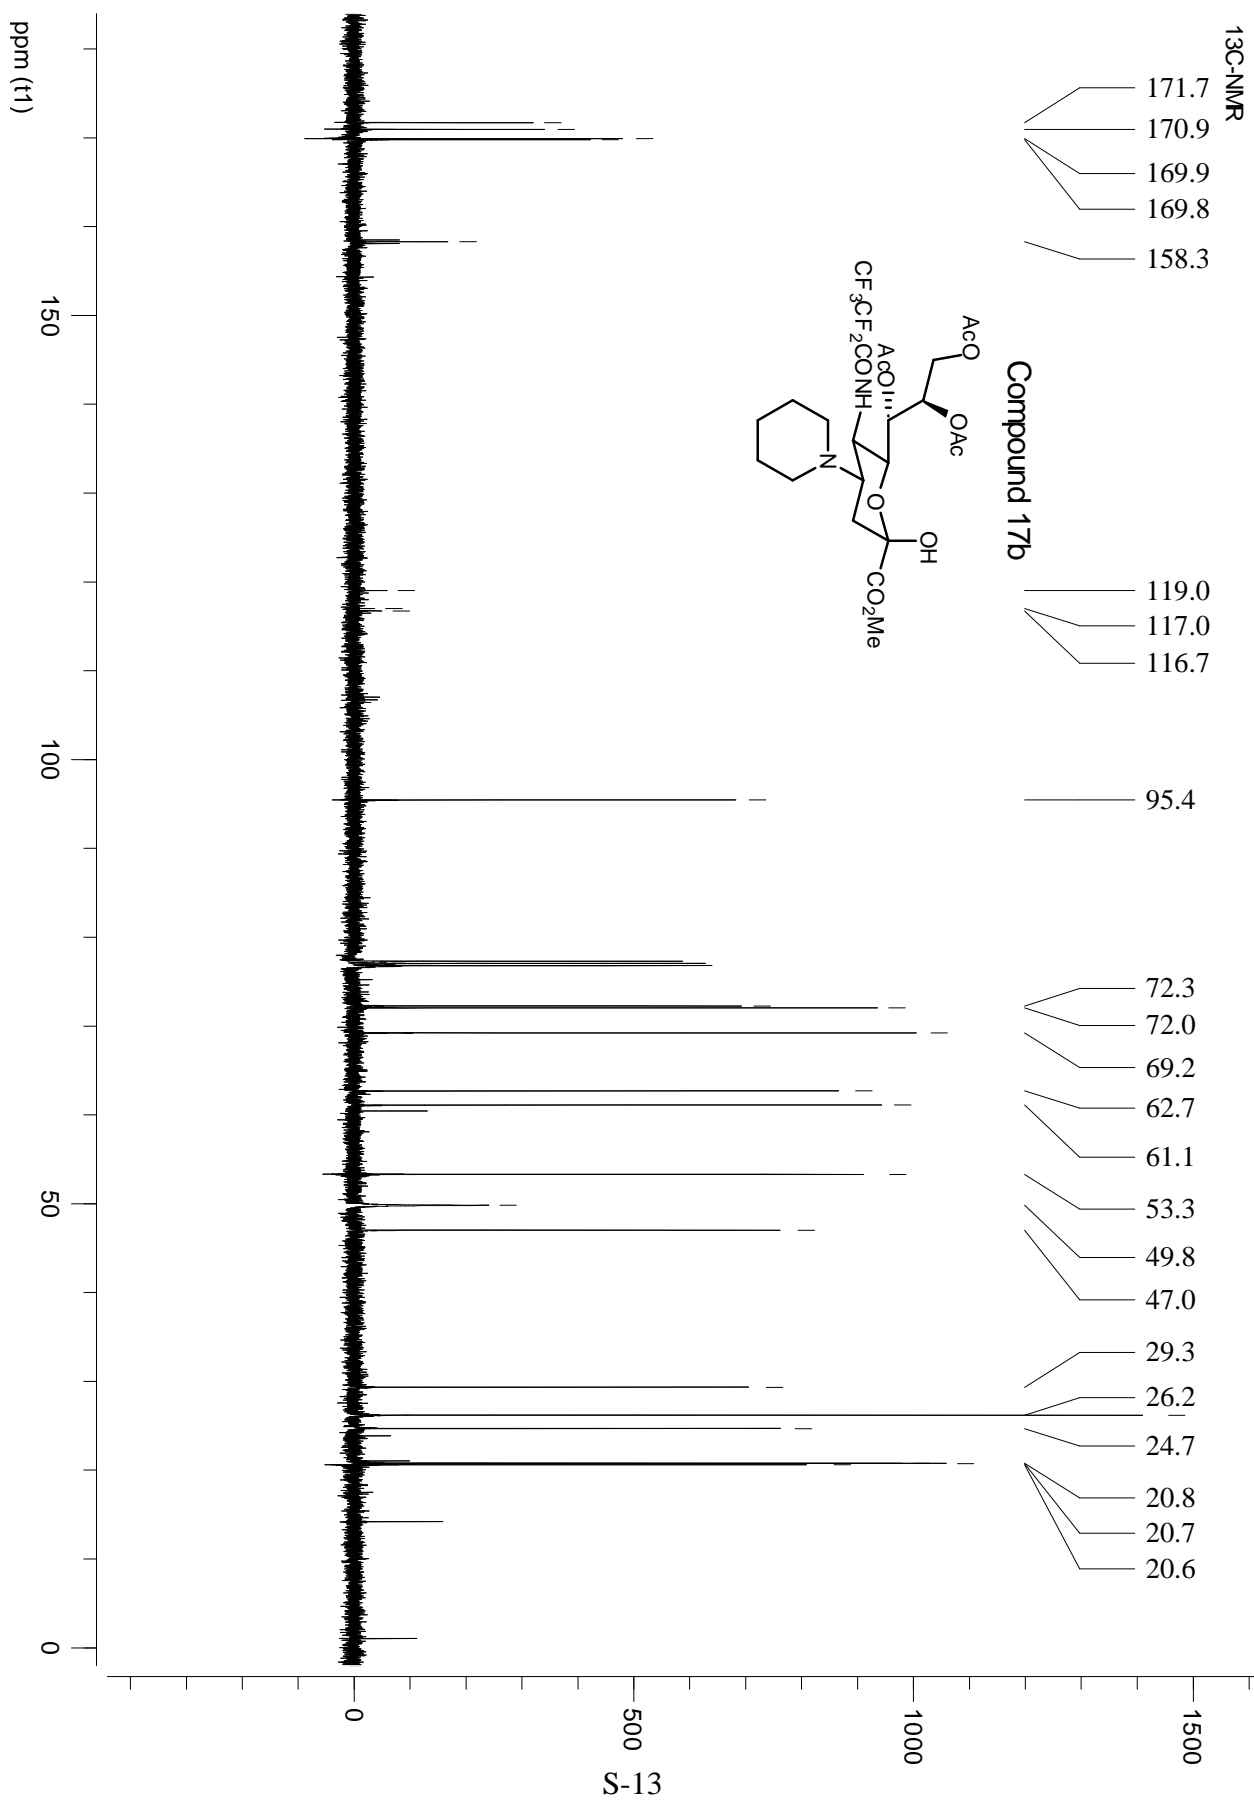

<sup>1</sup>H-NMR

Compound 16c

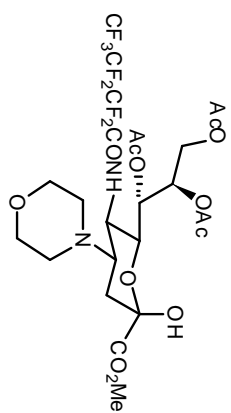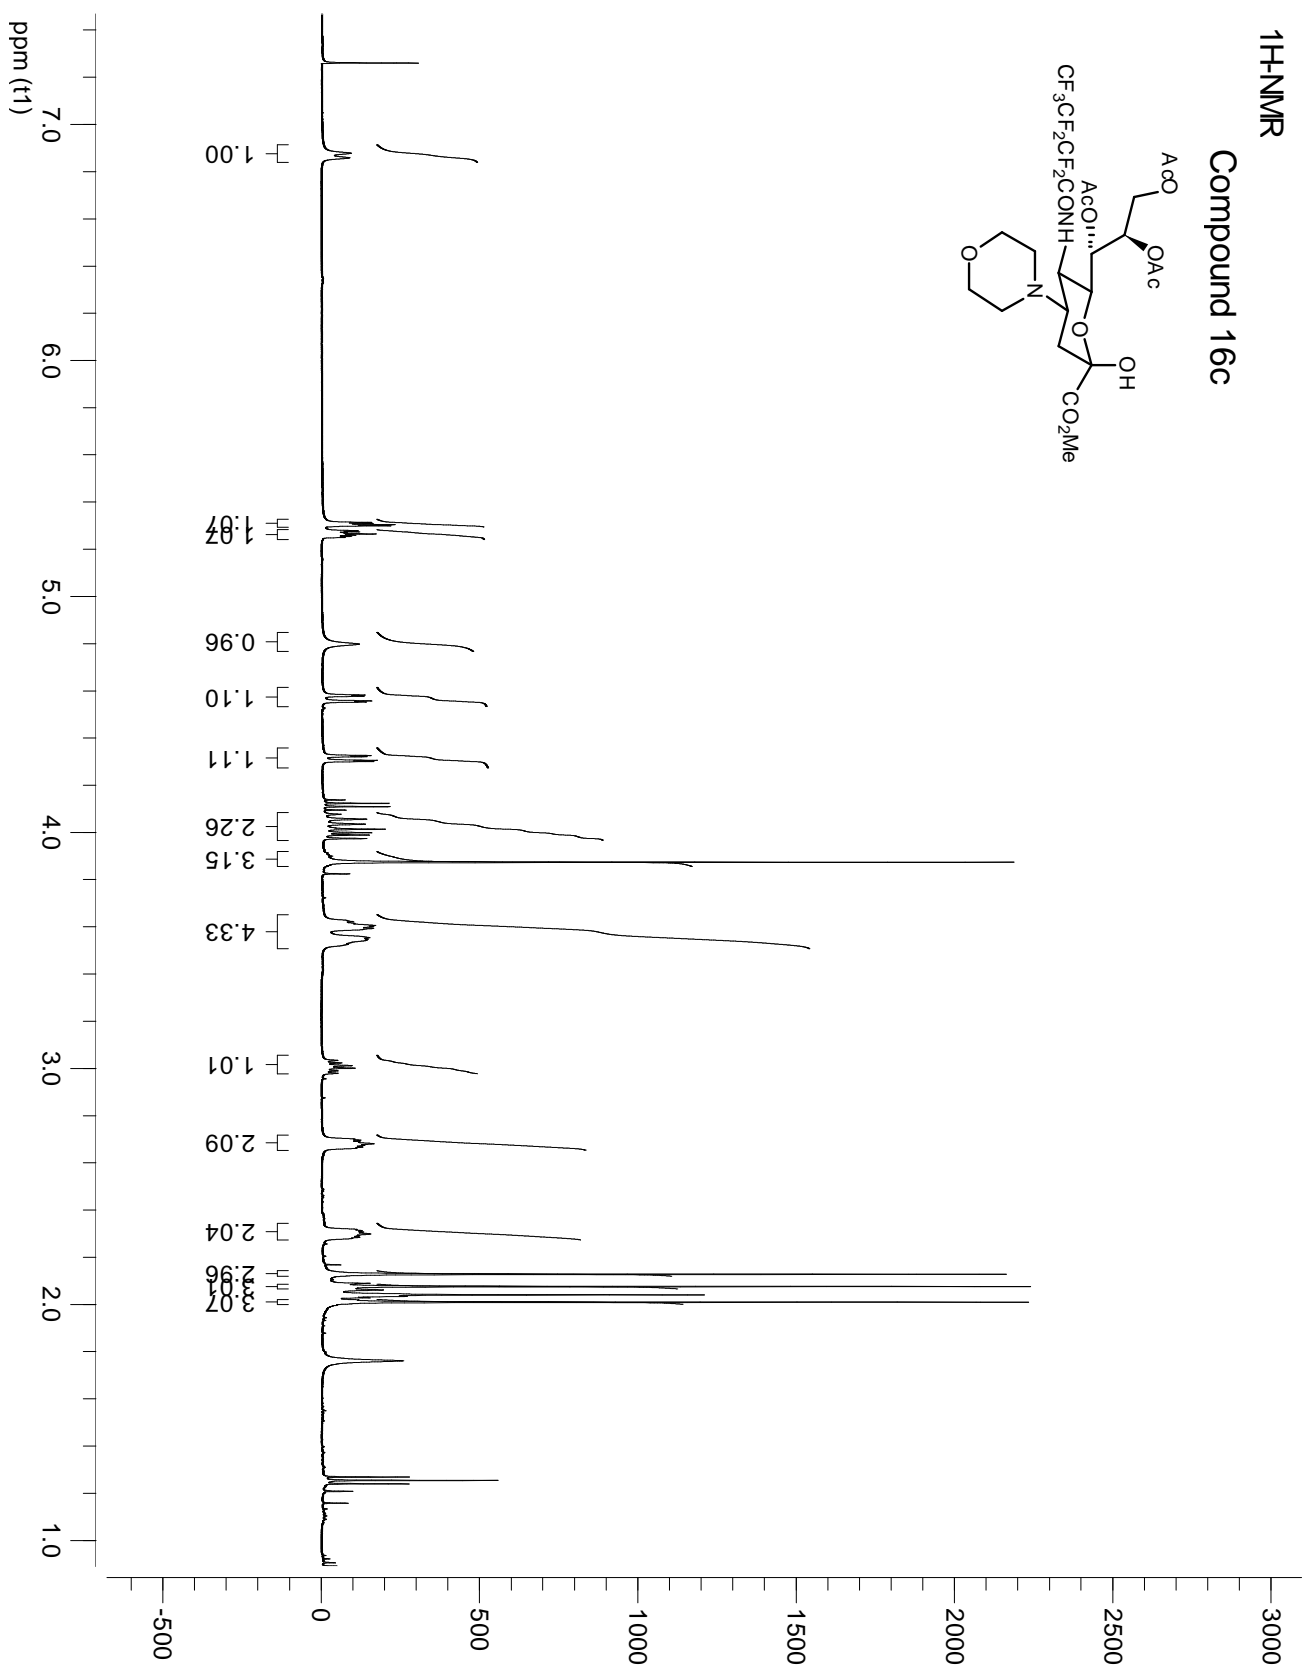

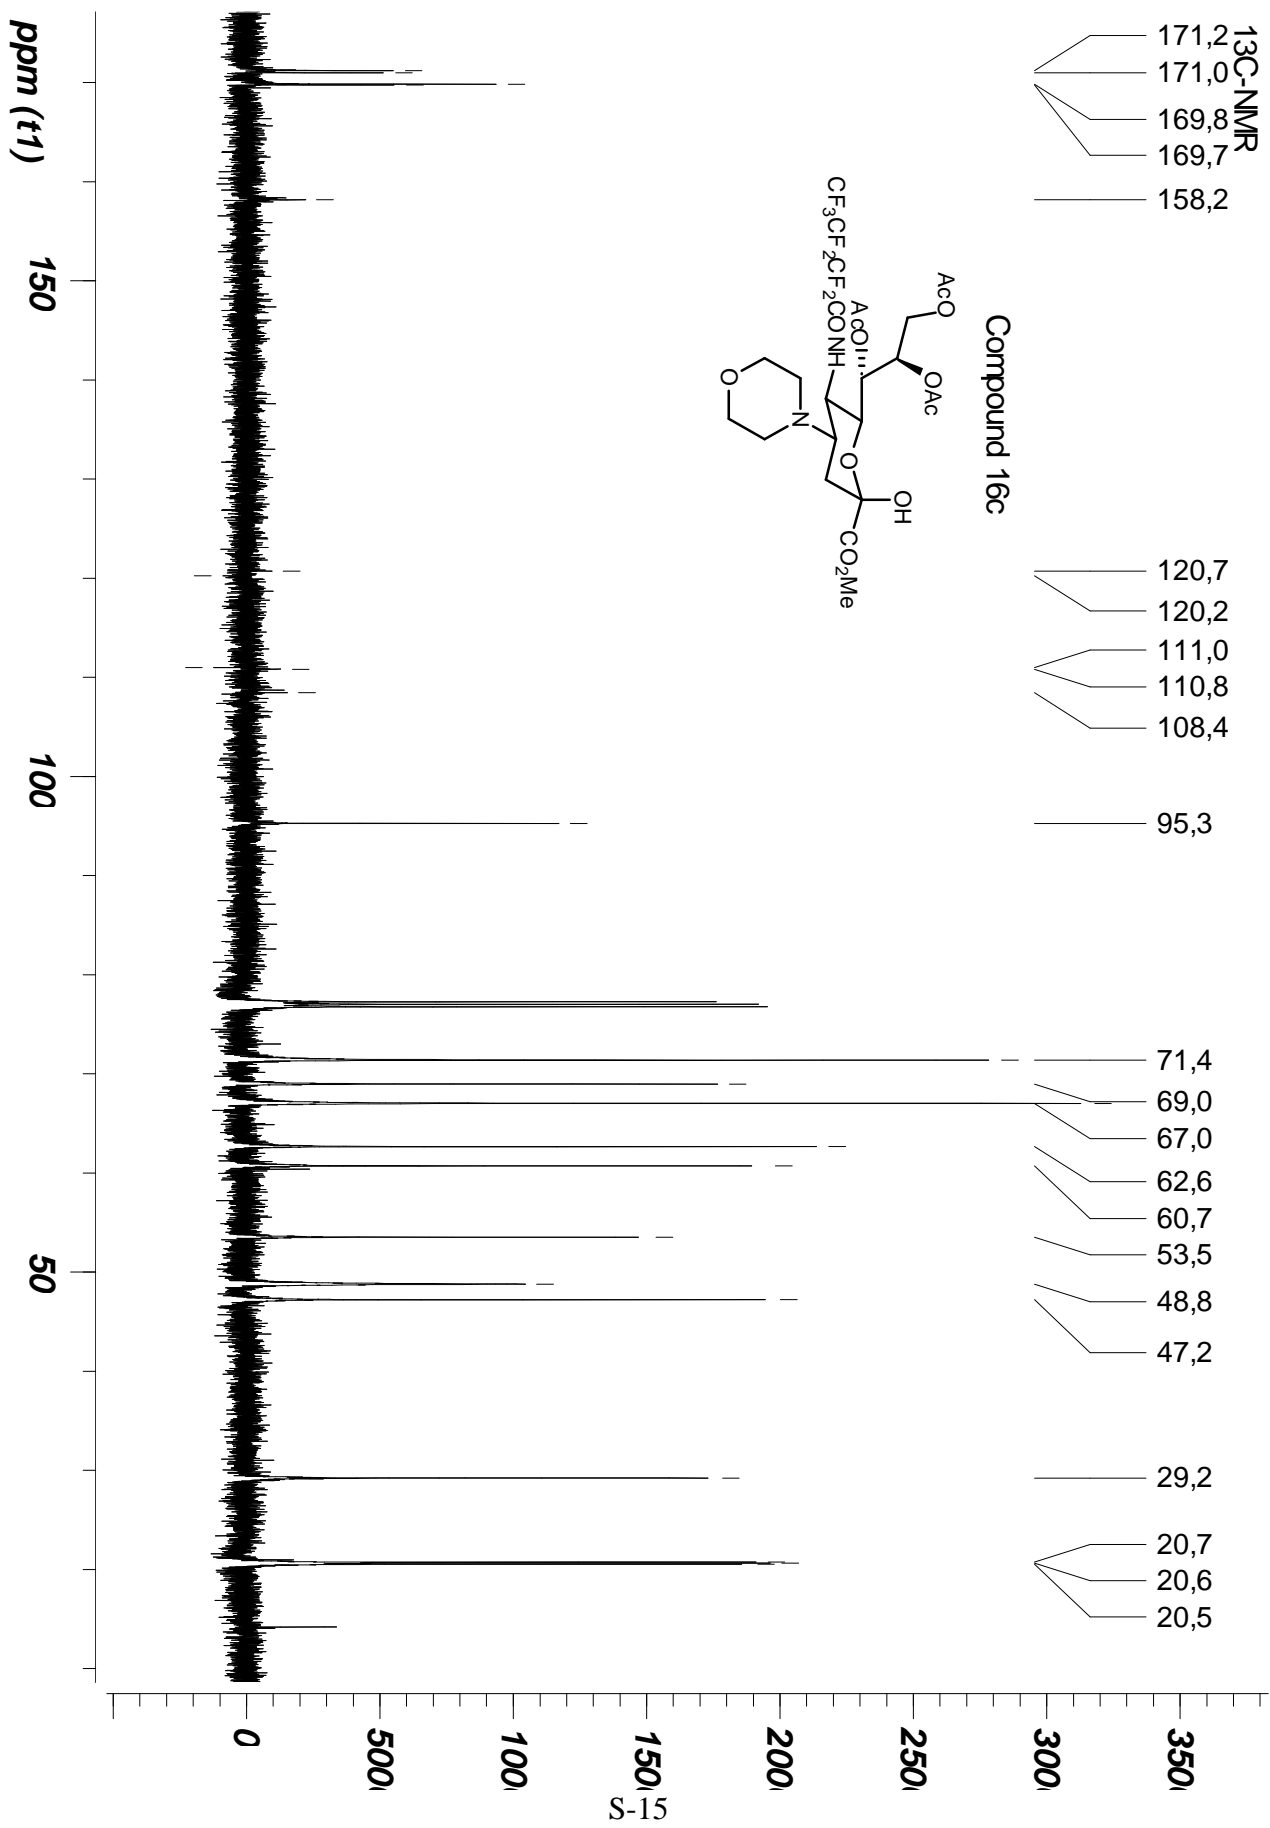

<sup>1</sup>H-NMR

Compound 17c

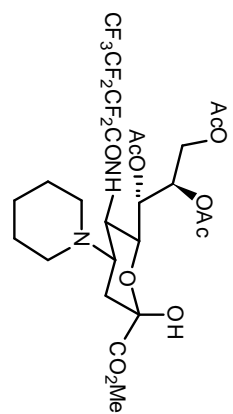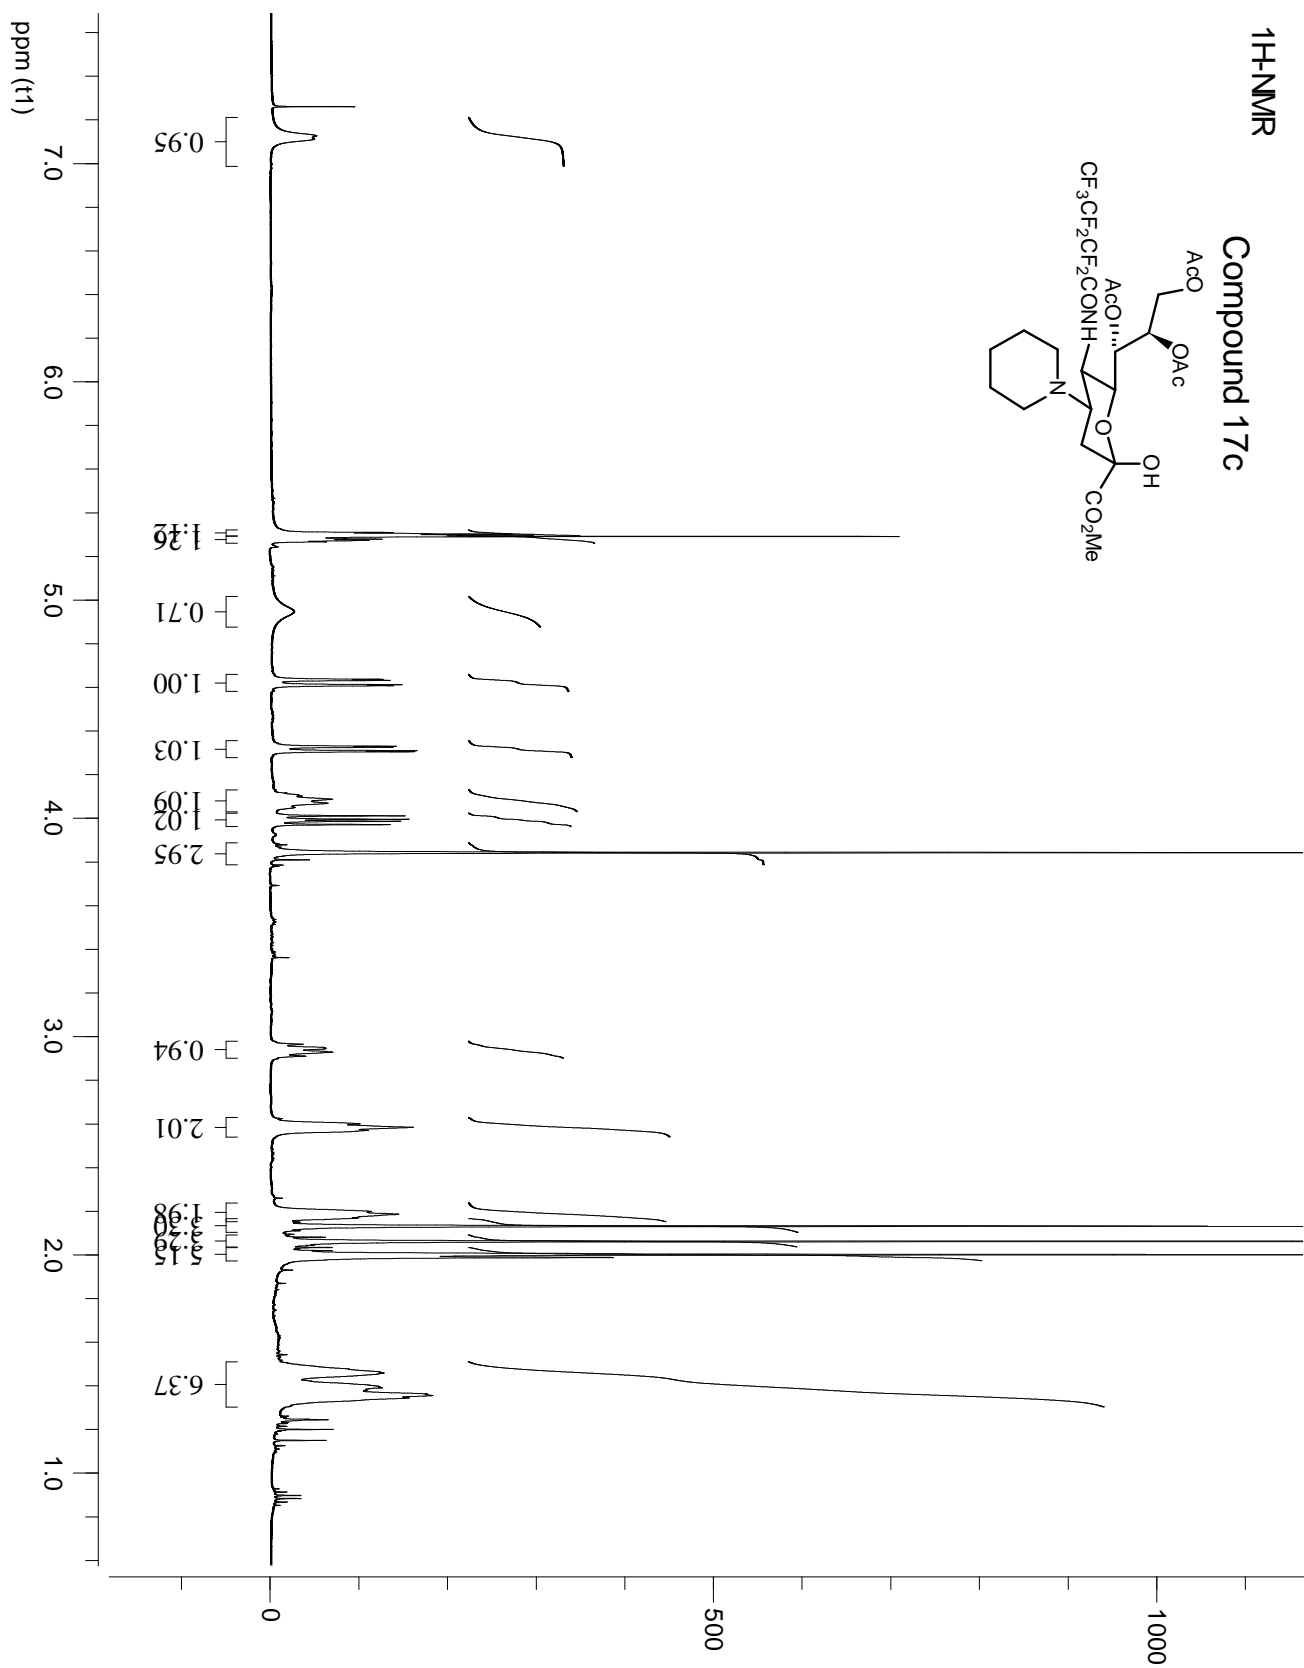



<sup>13</sup>C-NMR

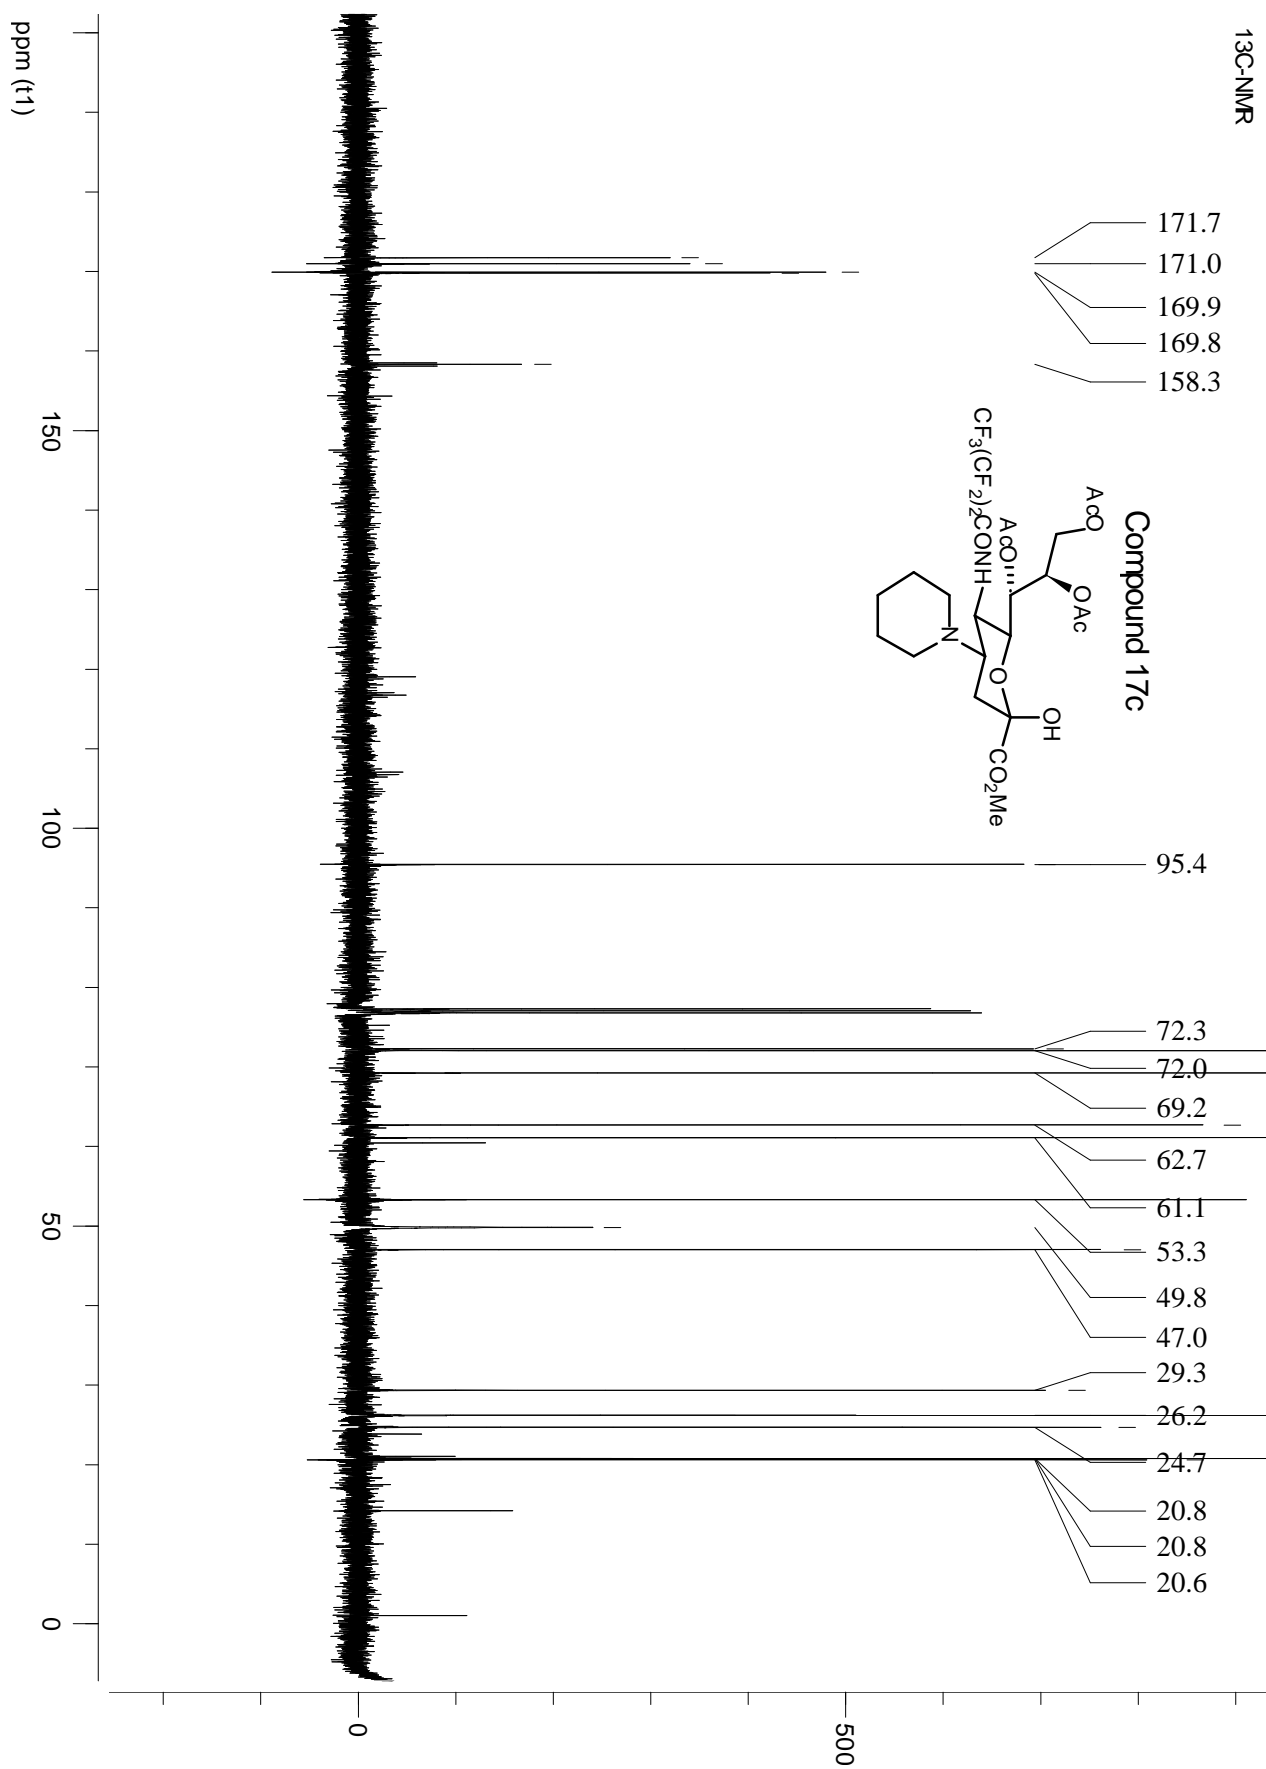

<sup>1</sup>H-NMR

Compound 11

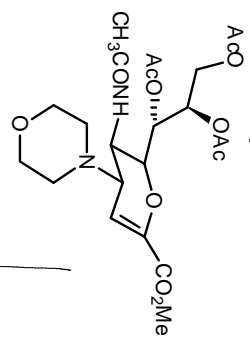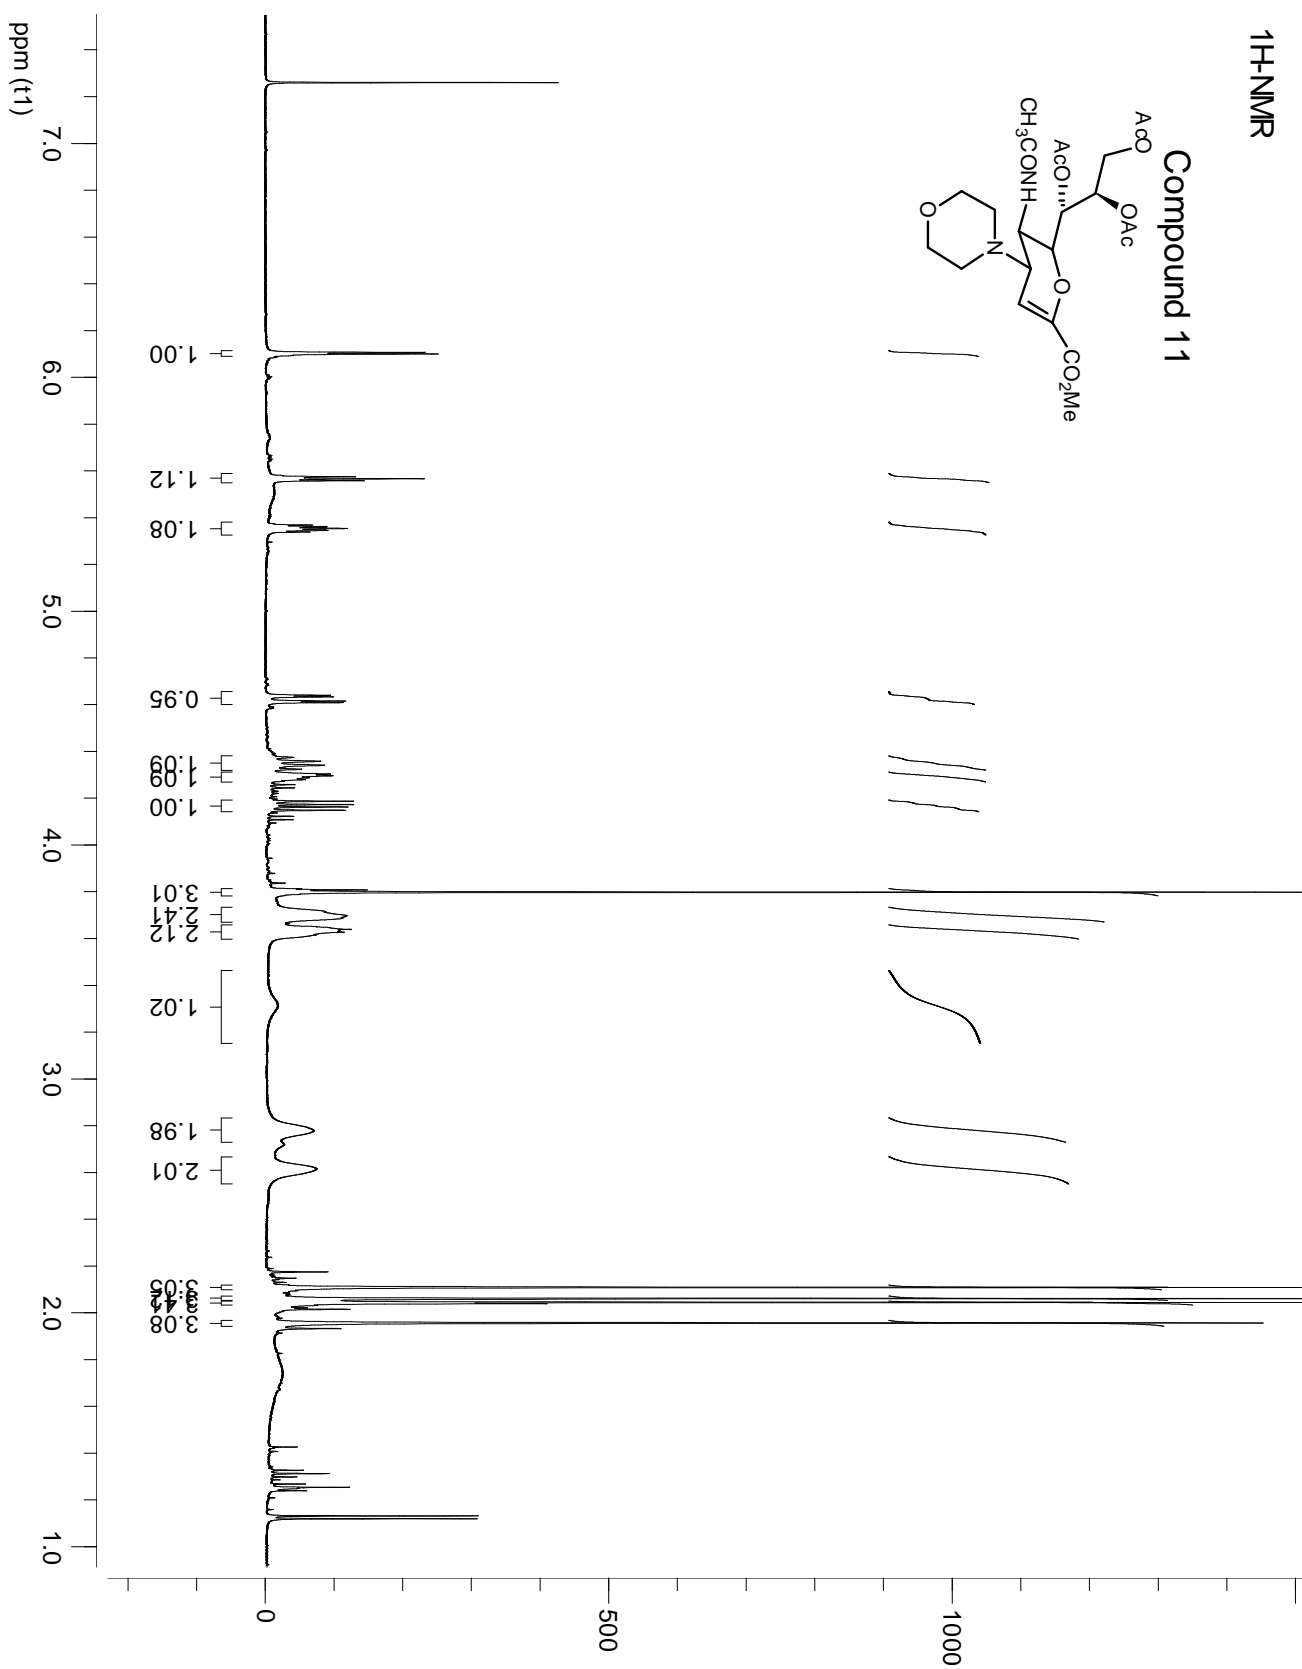

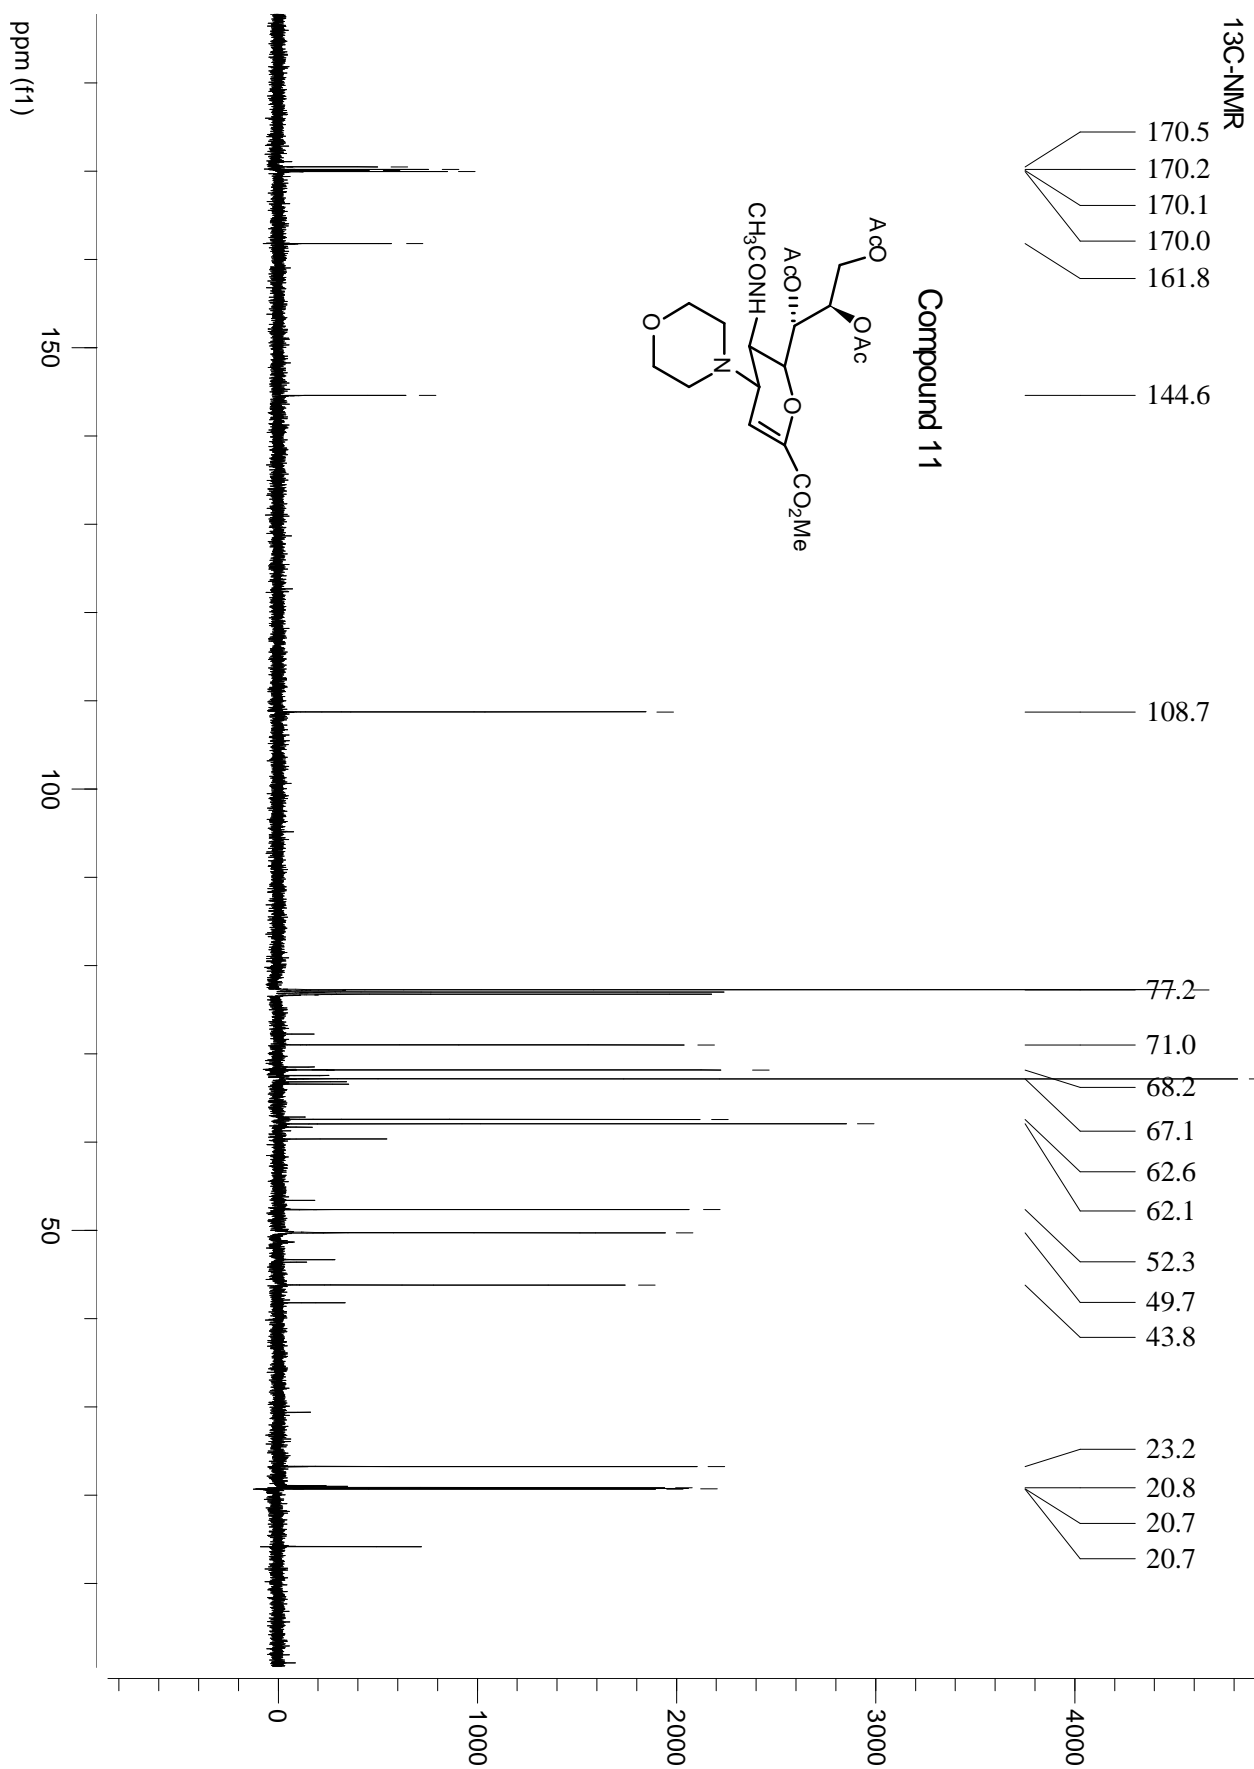

<sup>1</sup>H-NMR

Compound 12

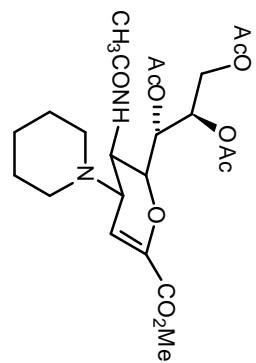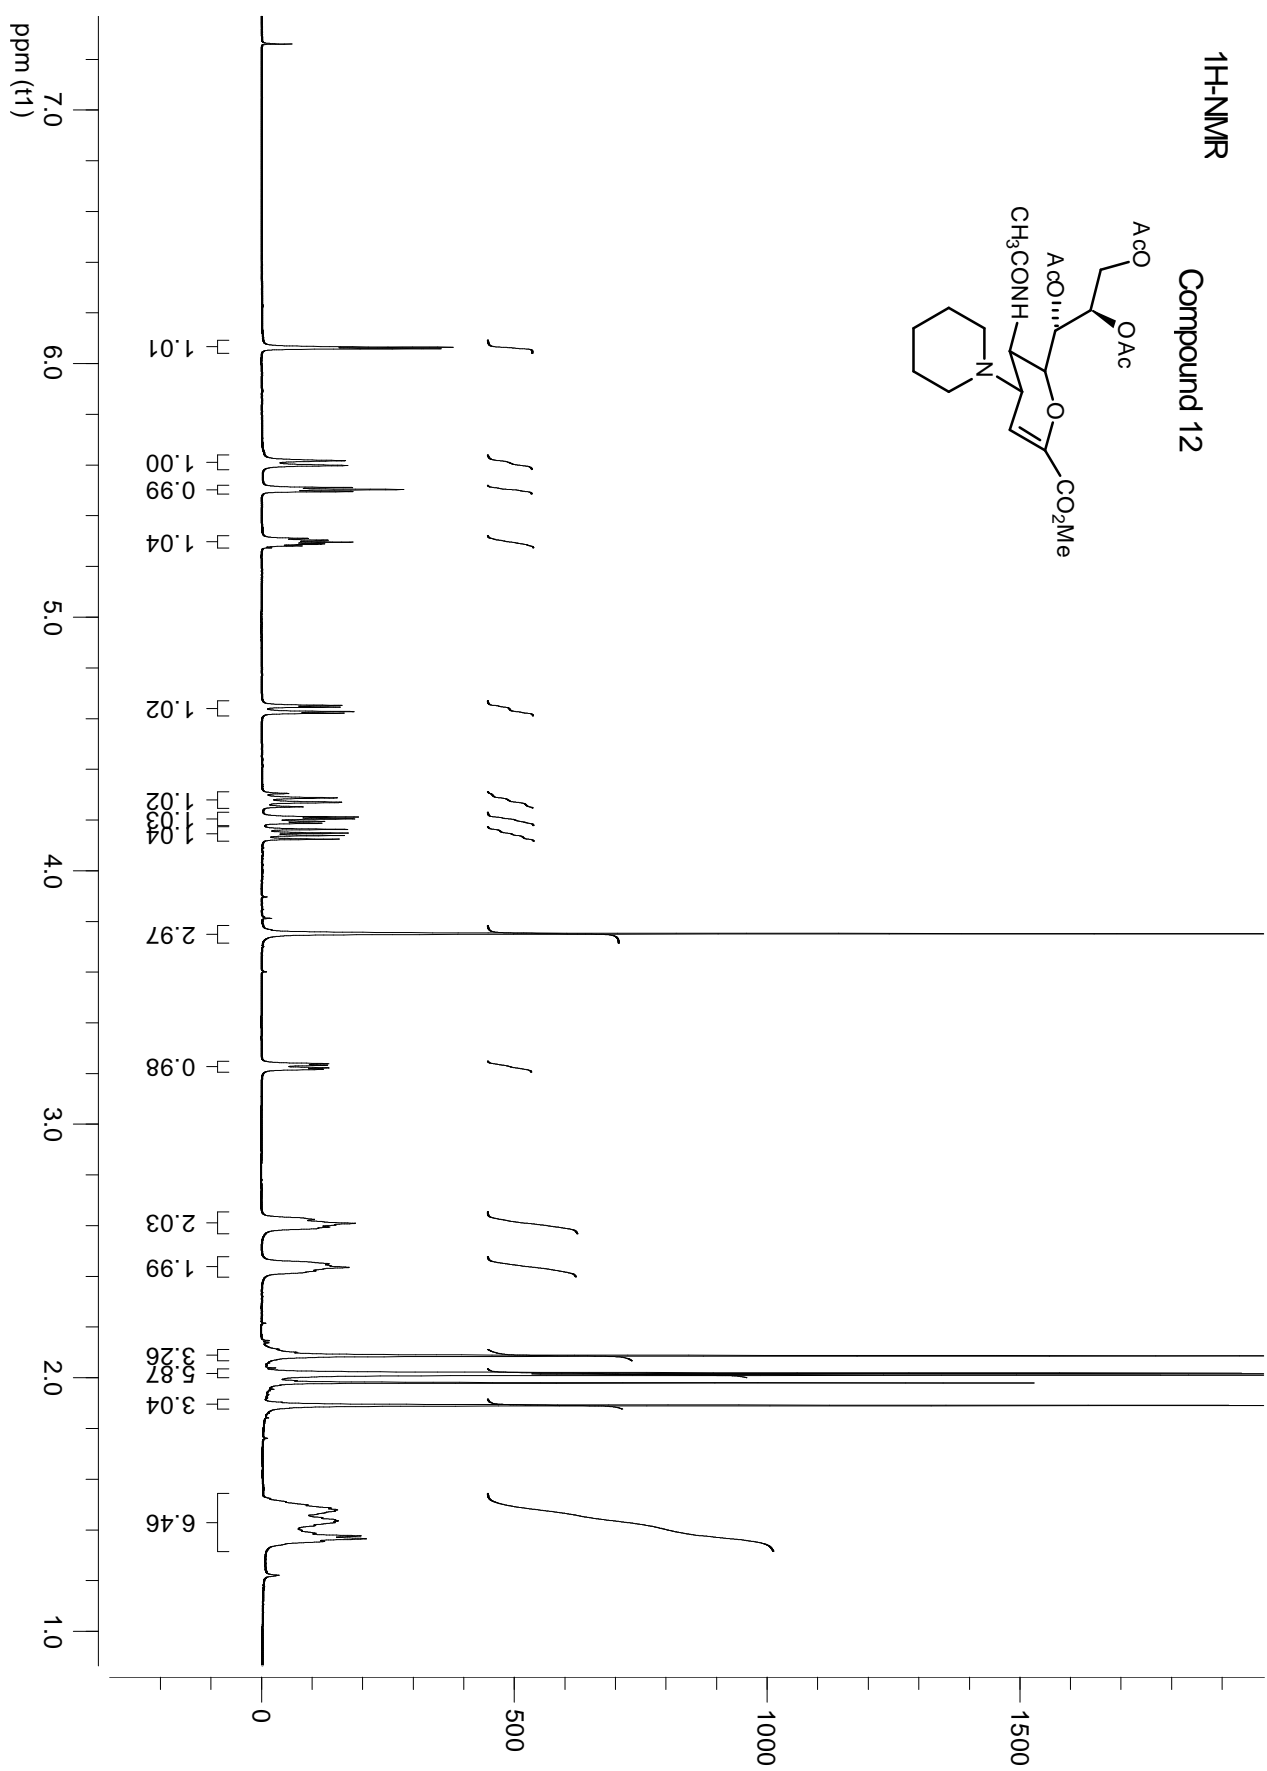

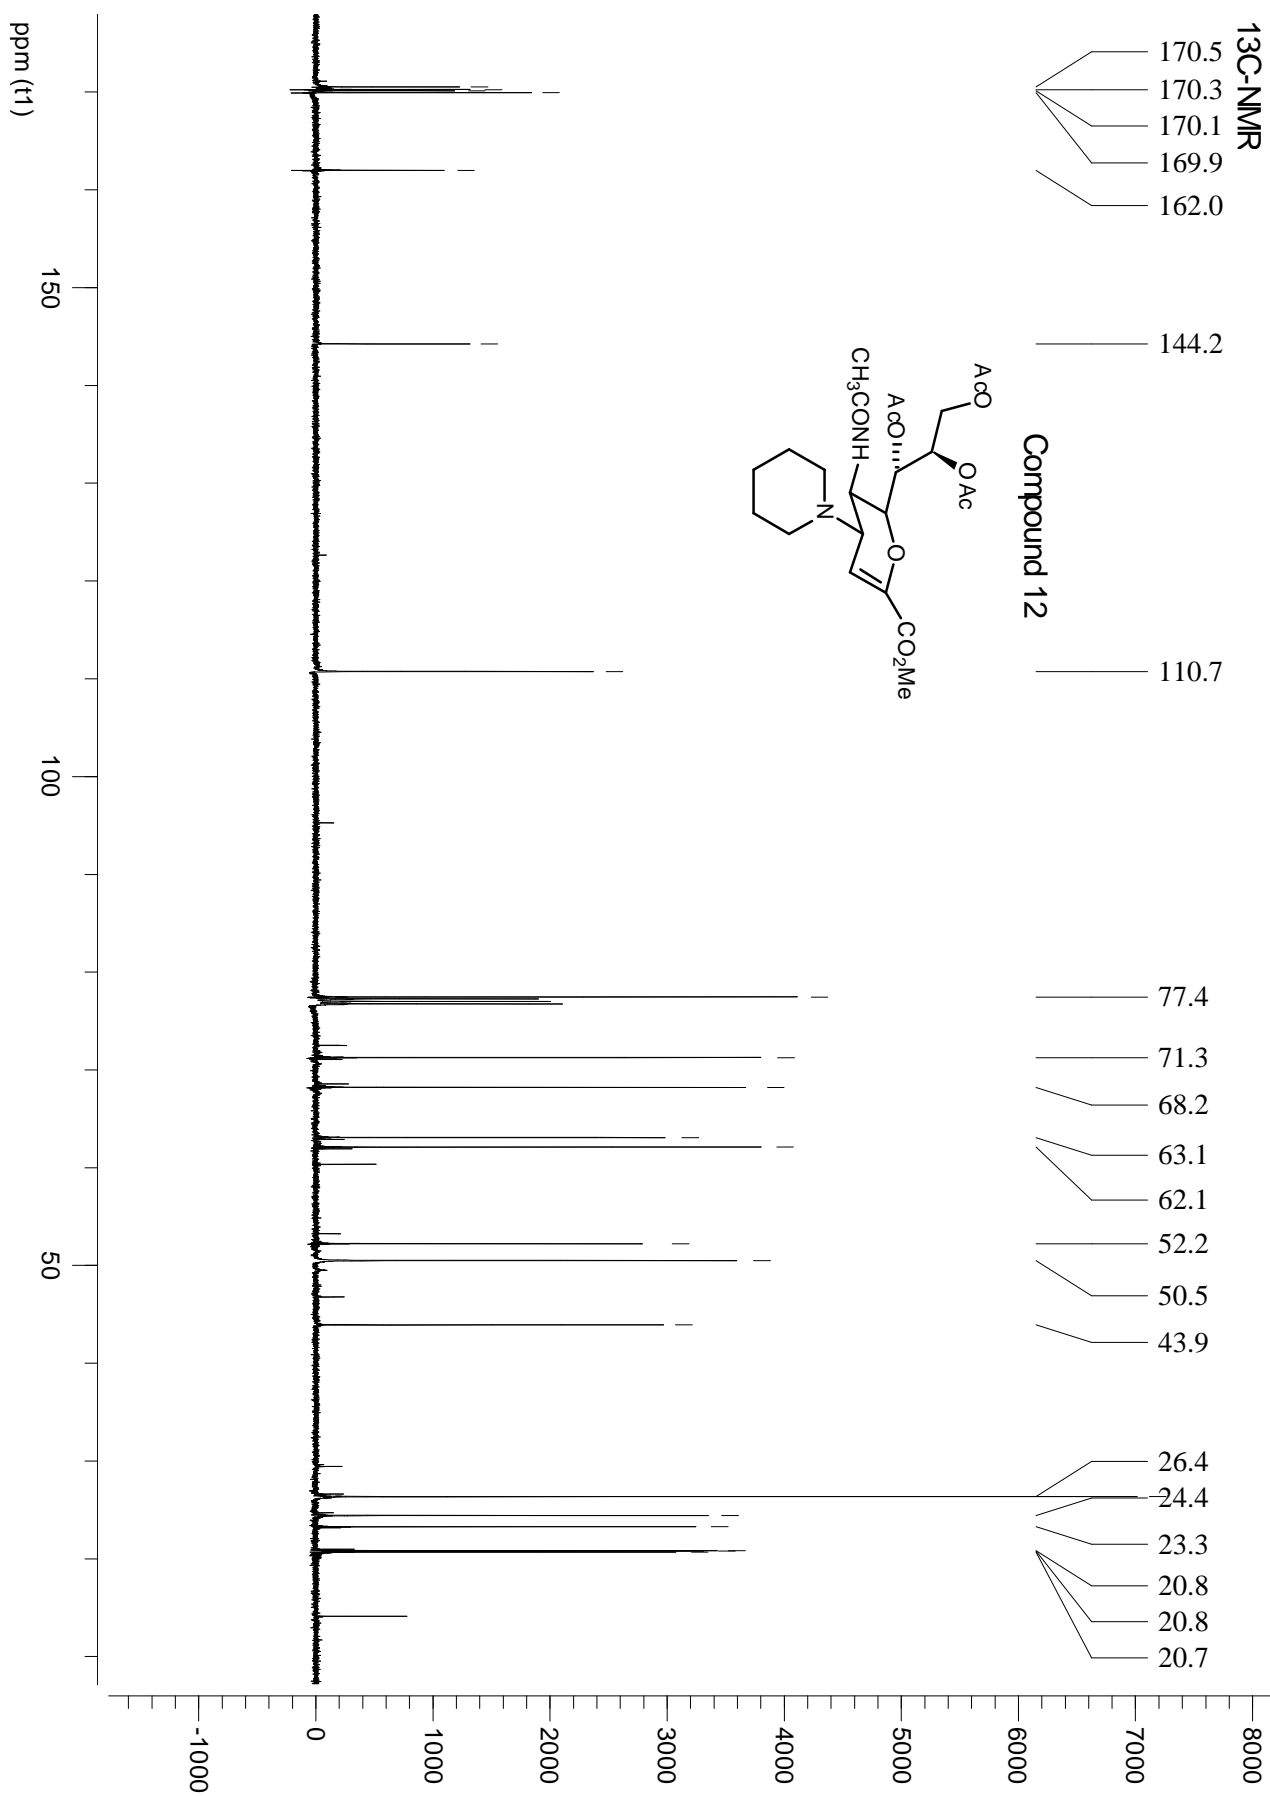

<sup>1</sup>H-NMR

Compound 13a

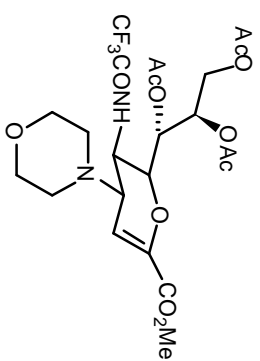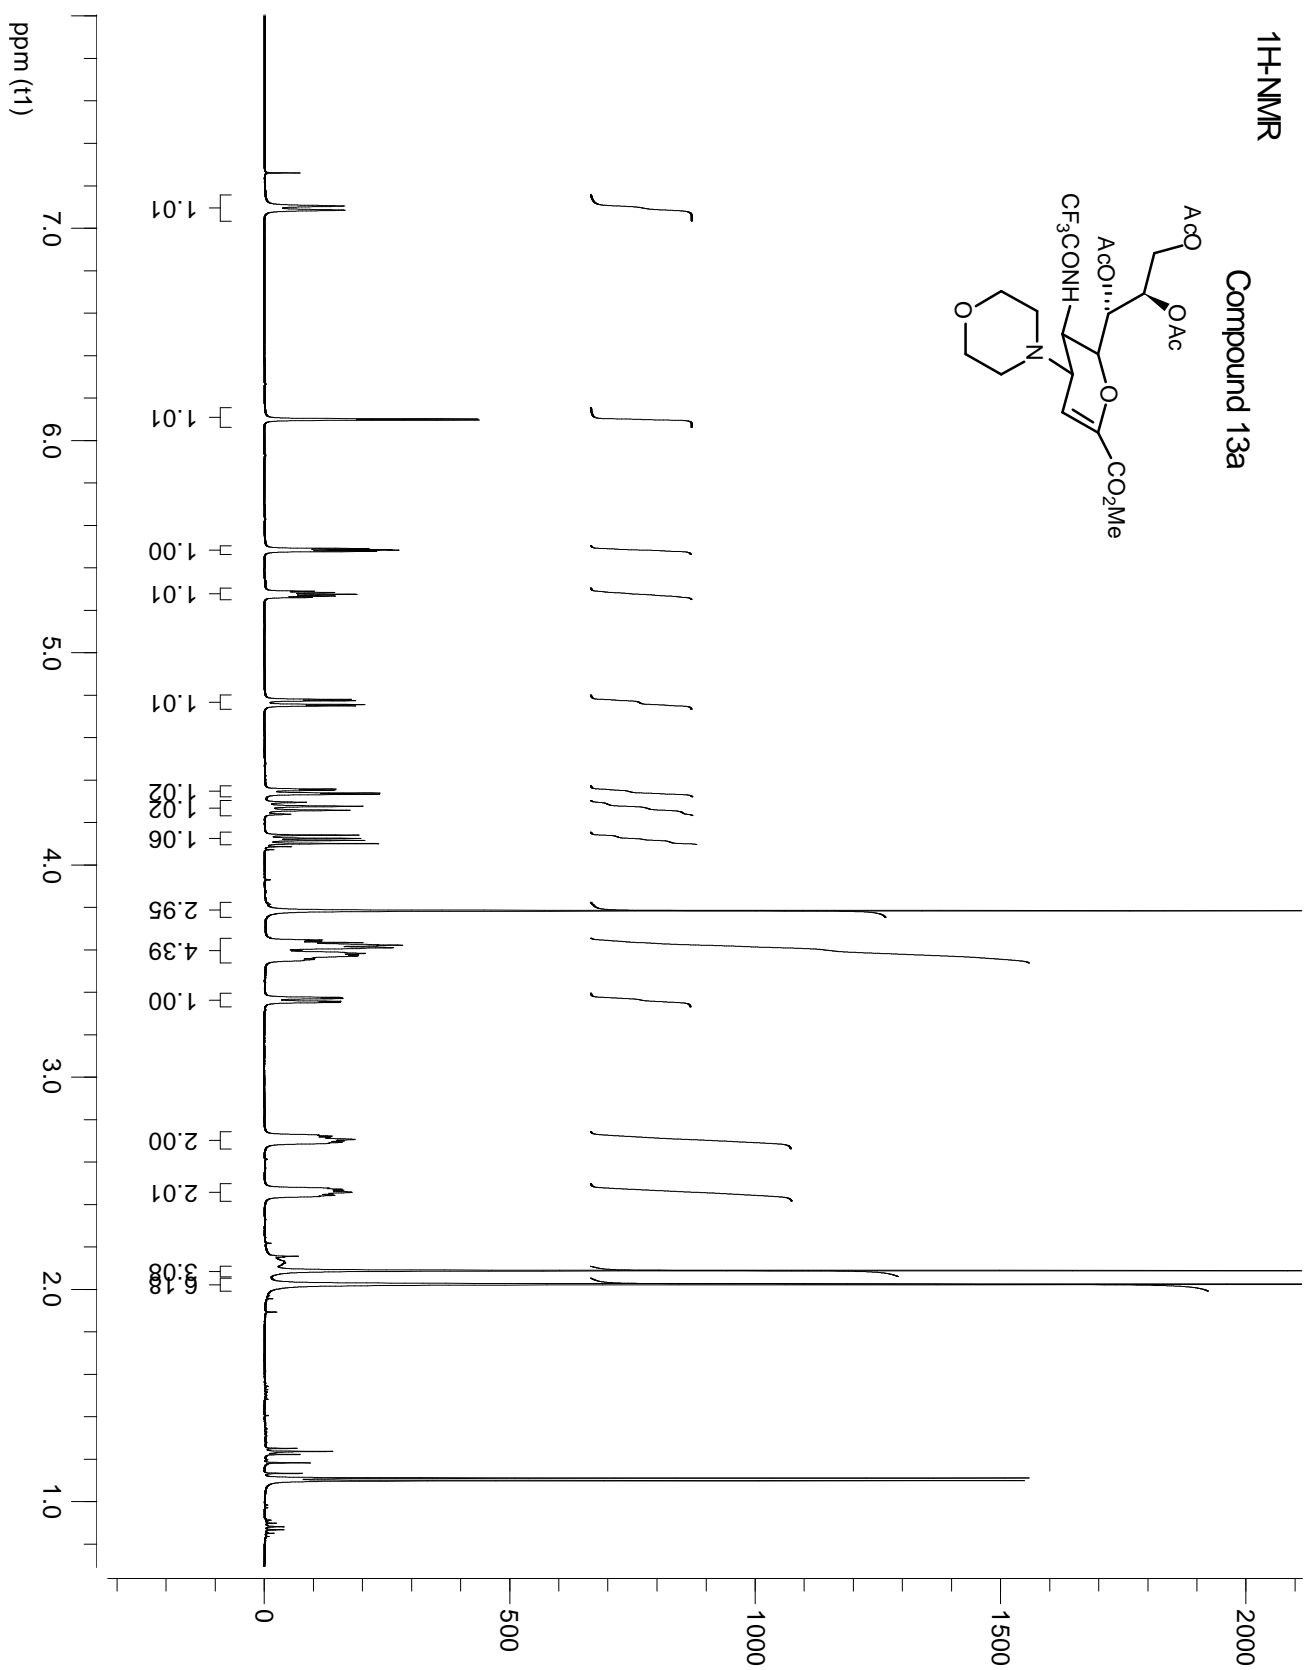

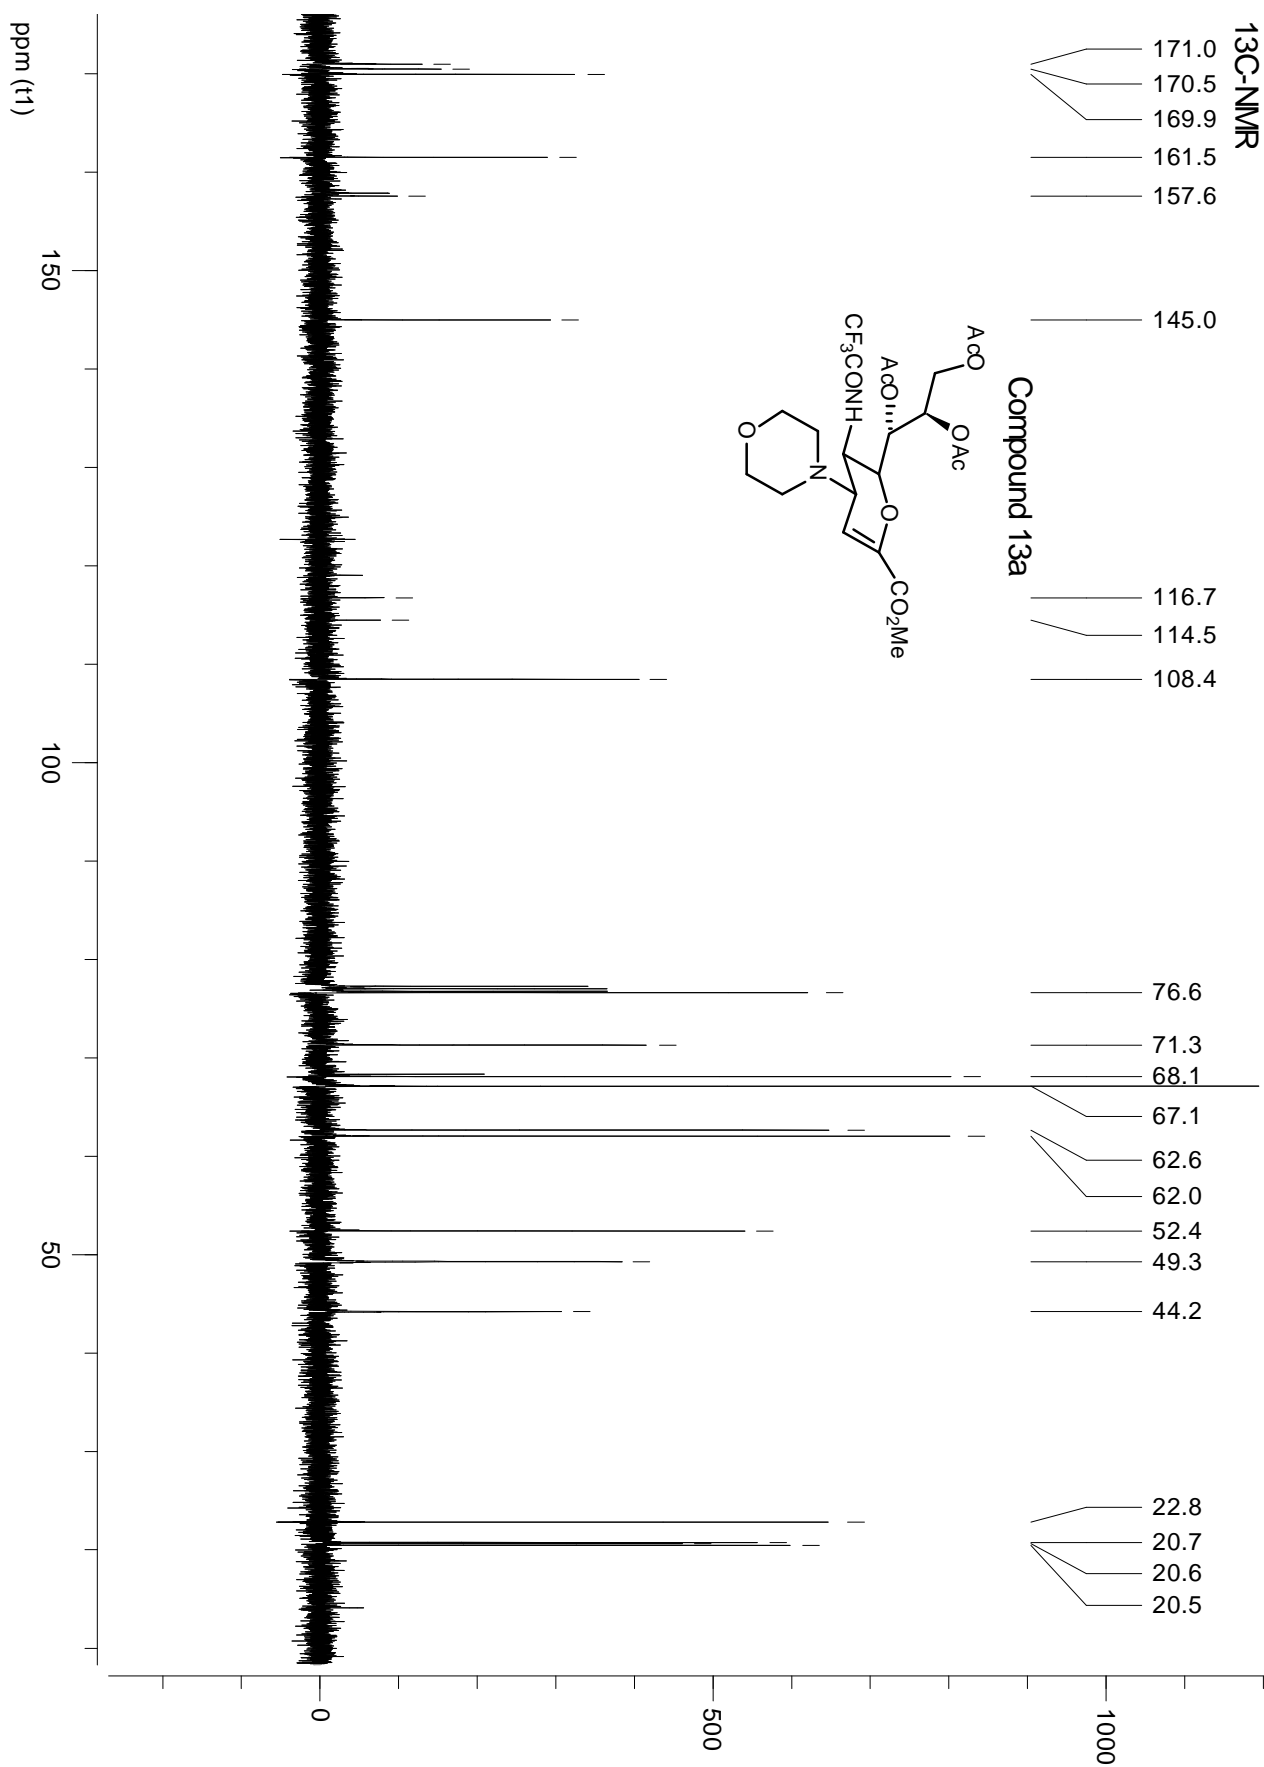

<sup>1</sup>H-NMR

Compound 14a

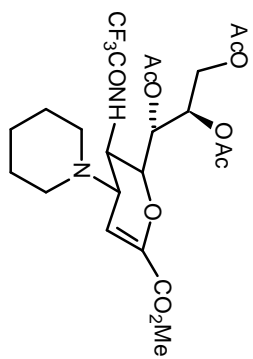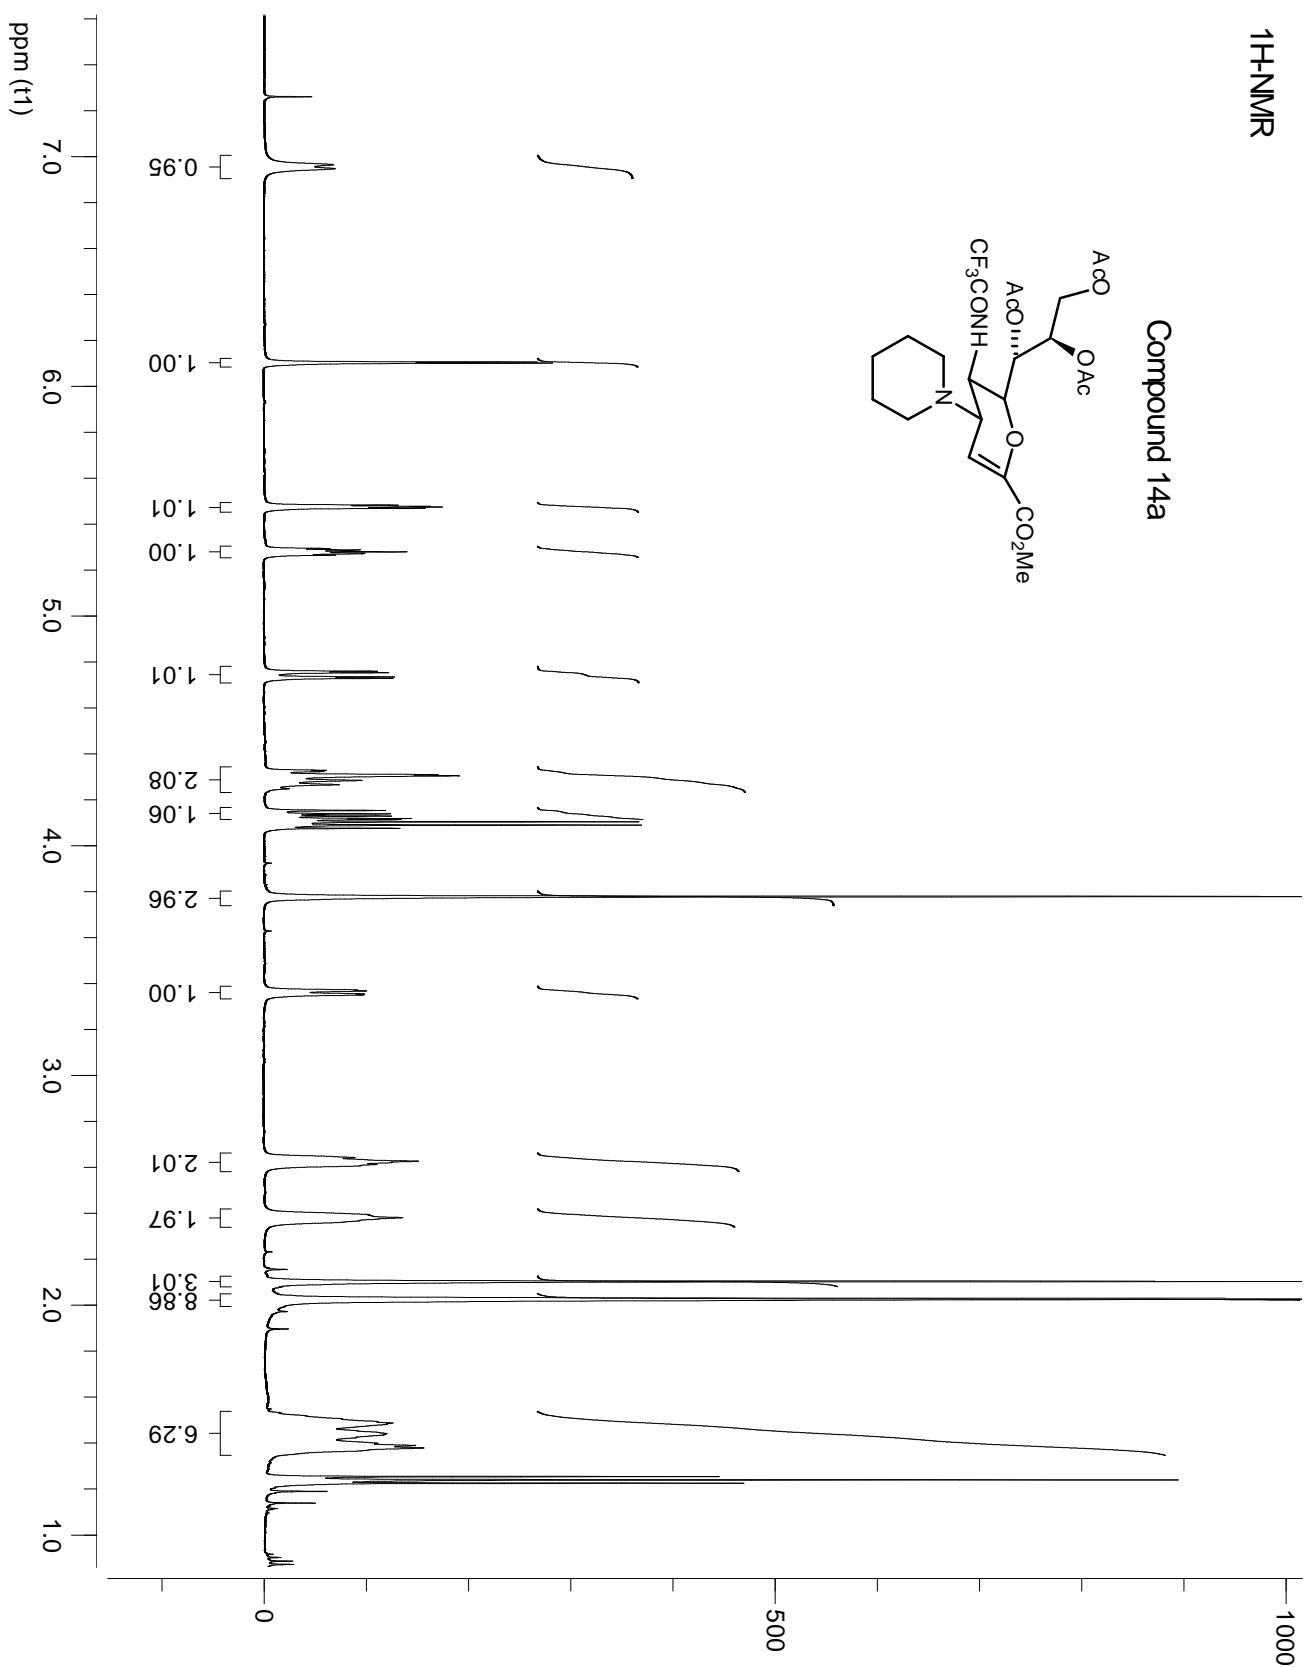



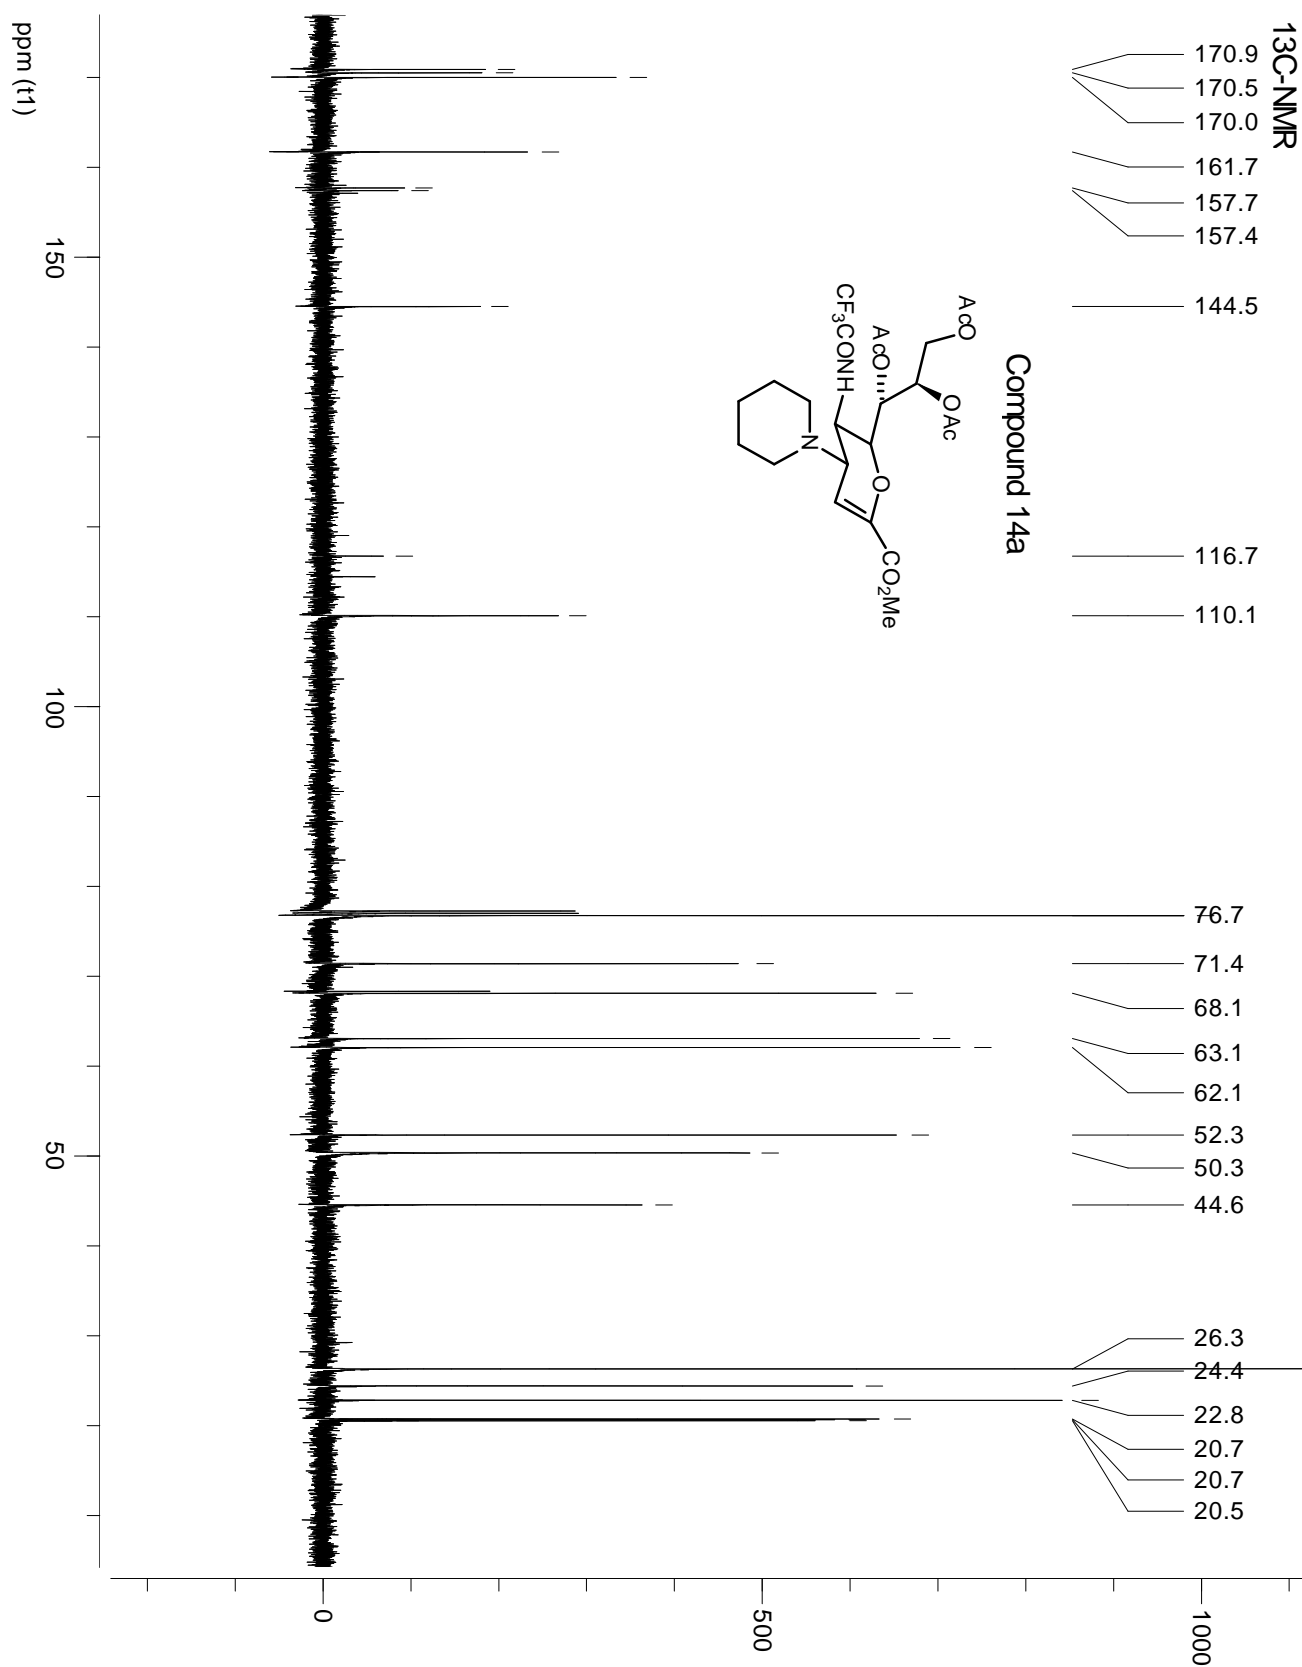

<sup>1</sup>H-NMR

Compound 13b

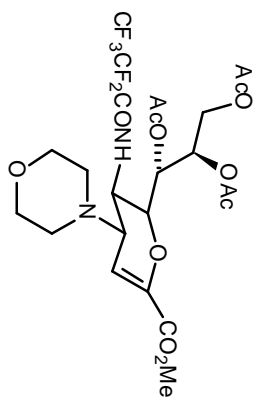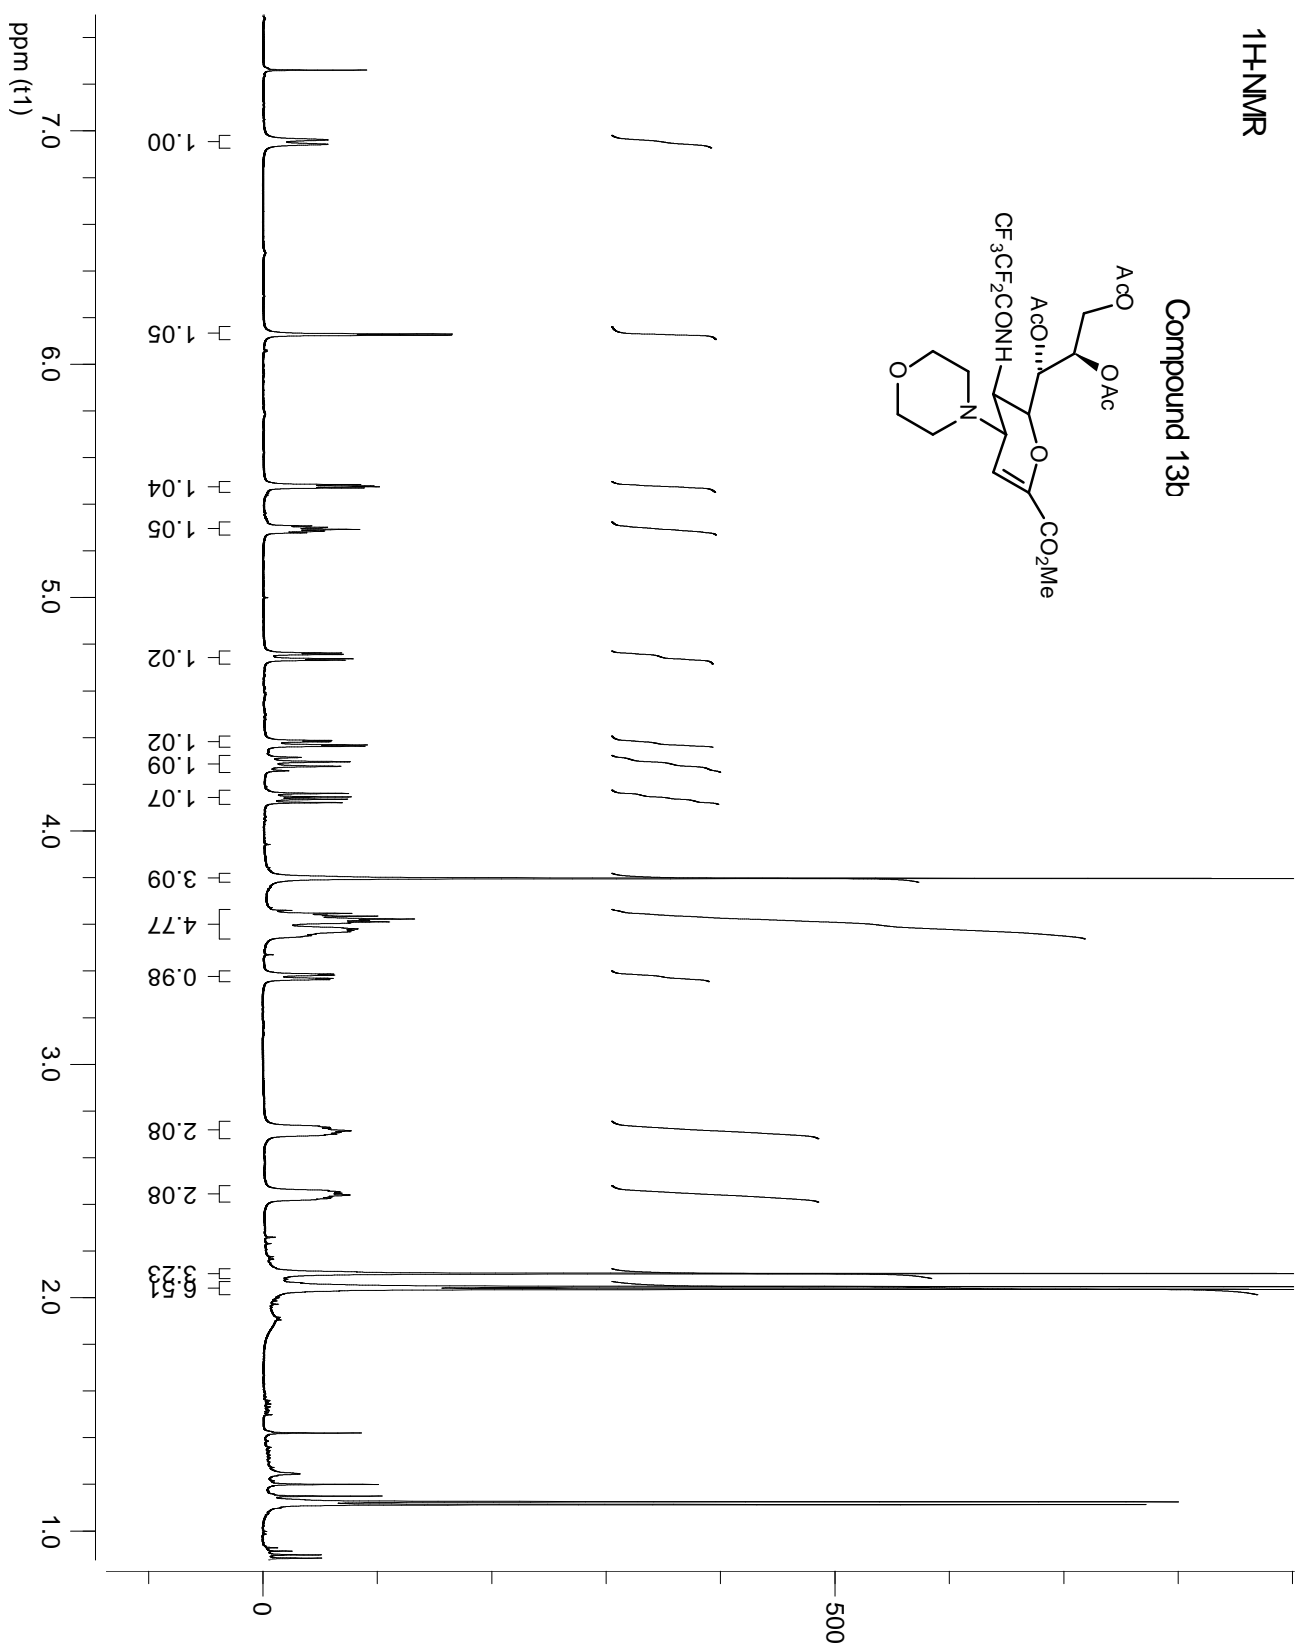

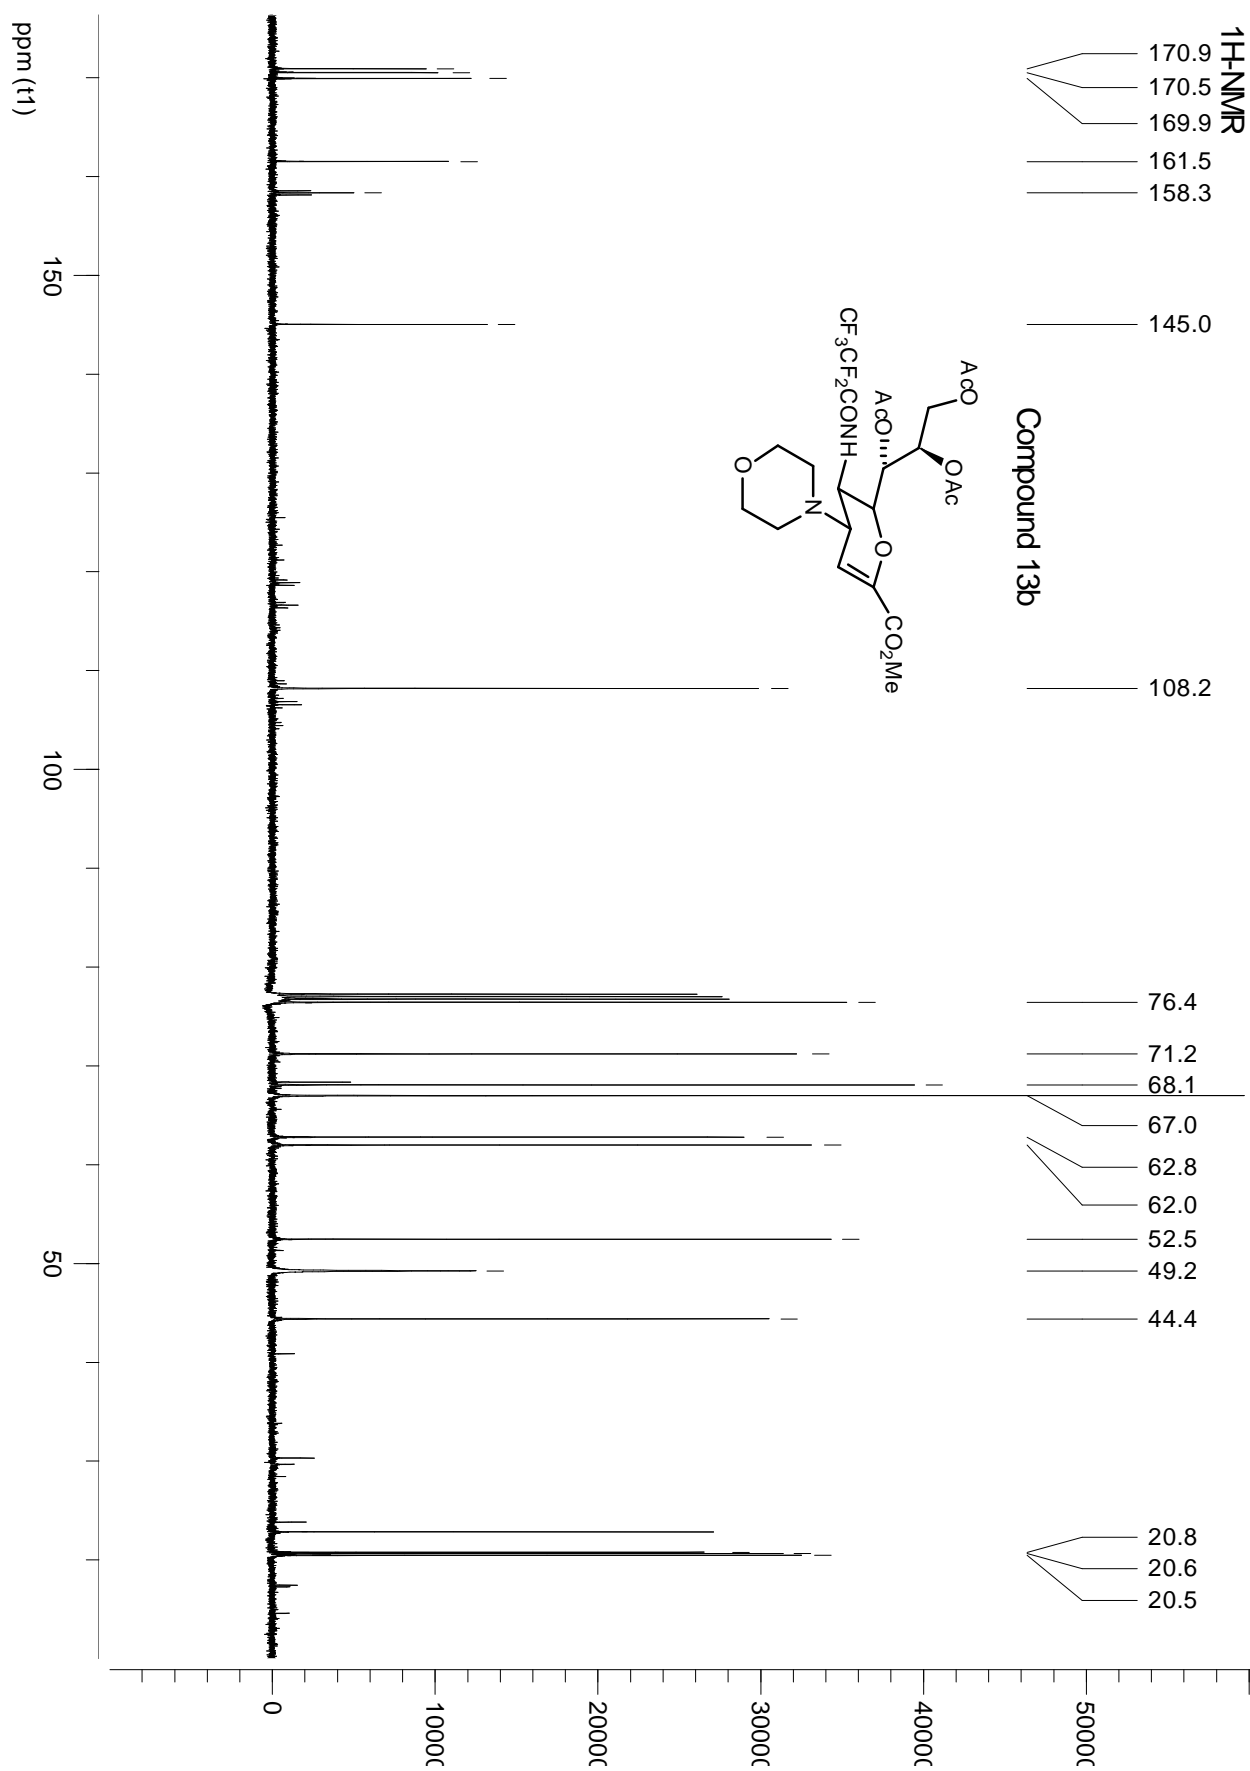

<sup>1</sup>H-NMR

Compound 14b

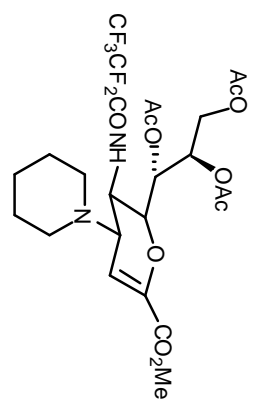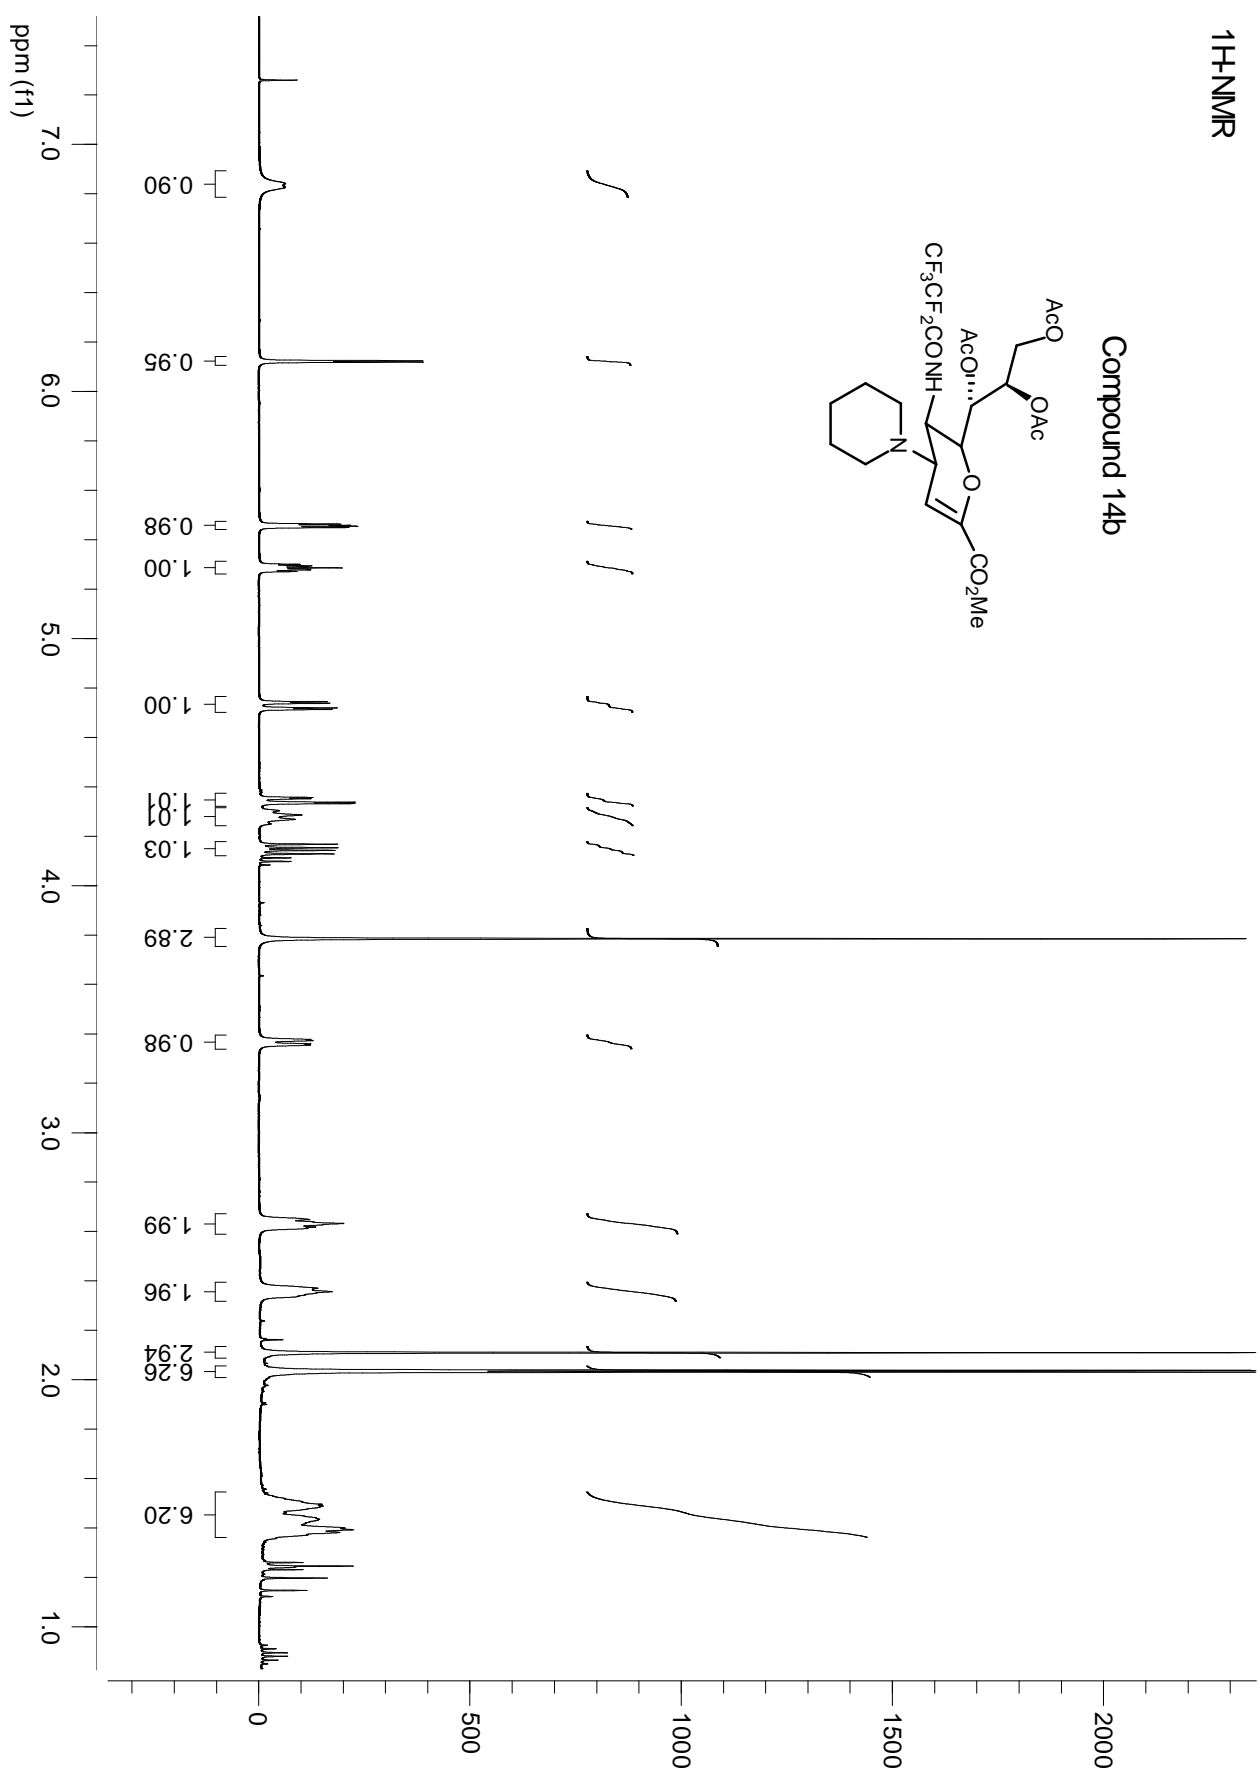

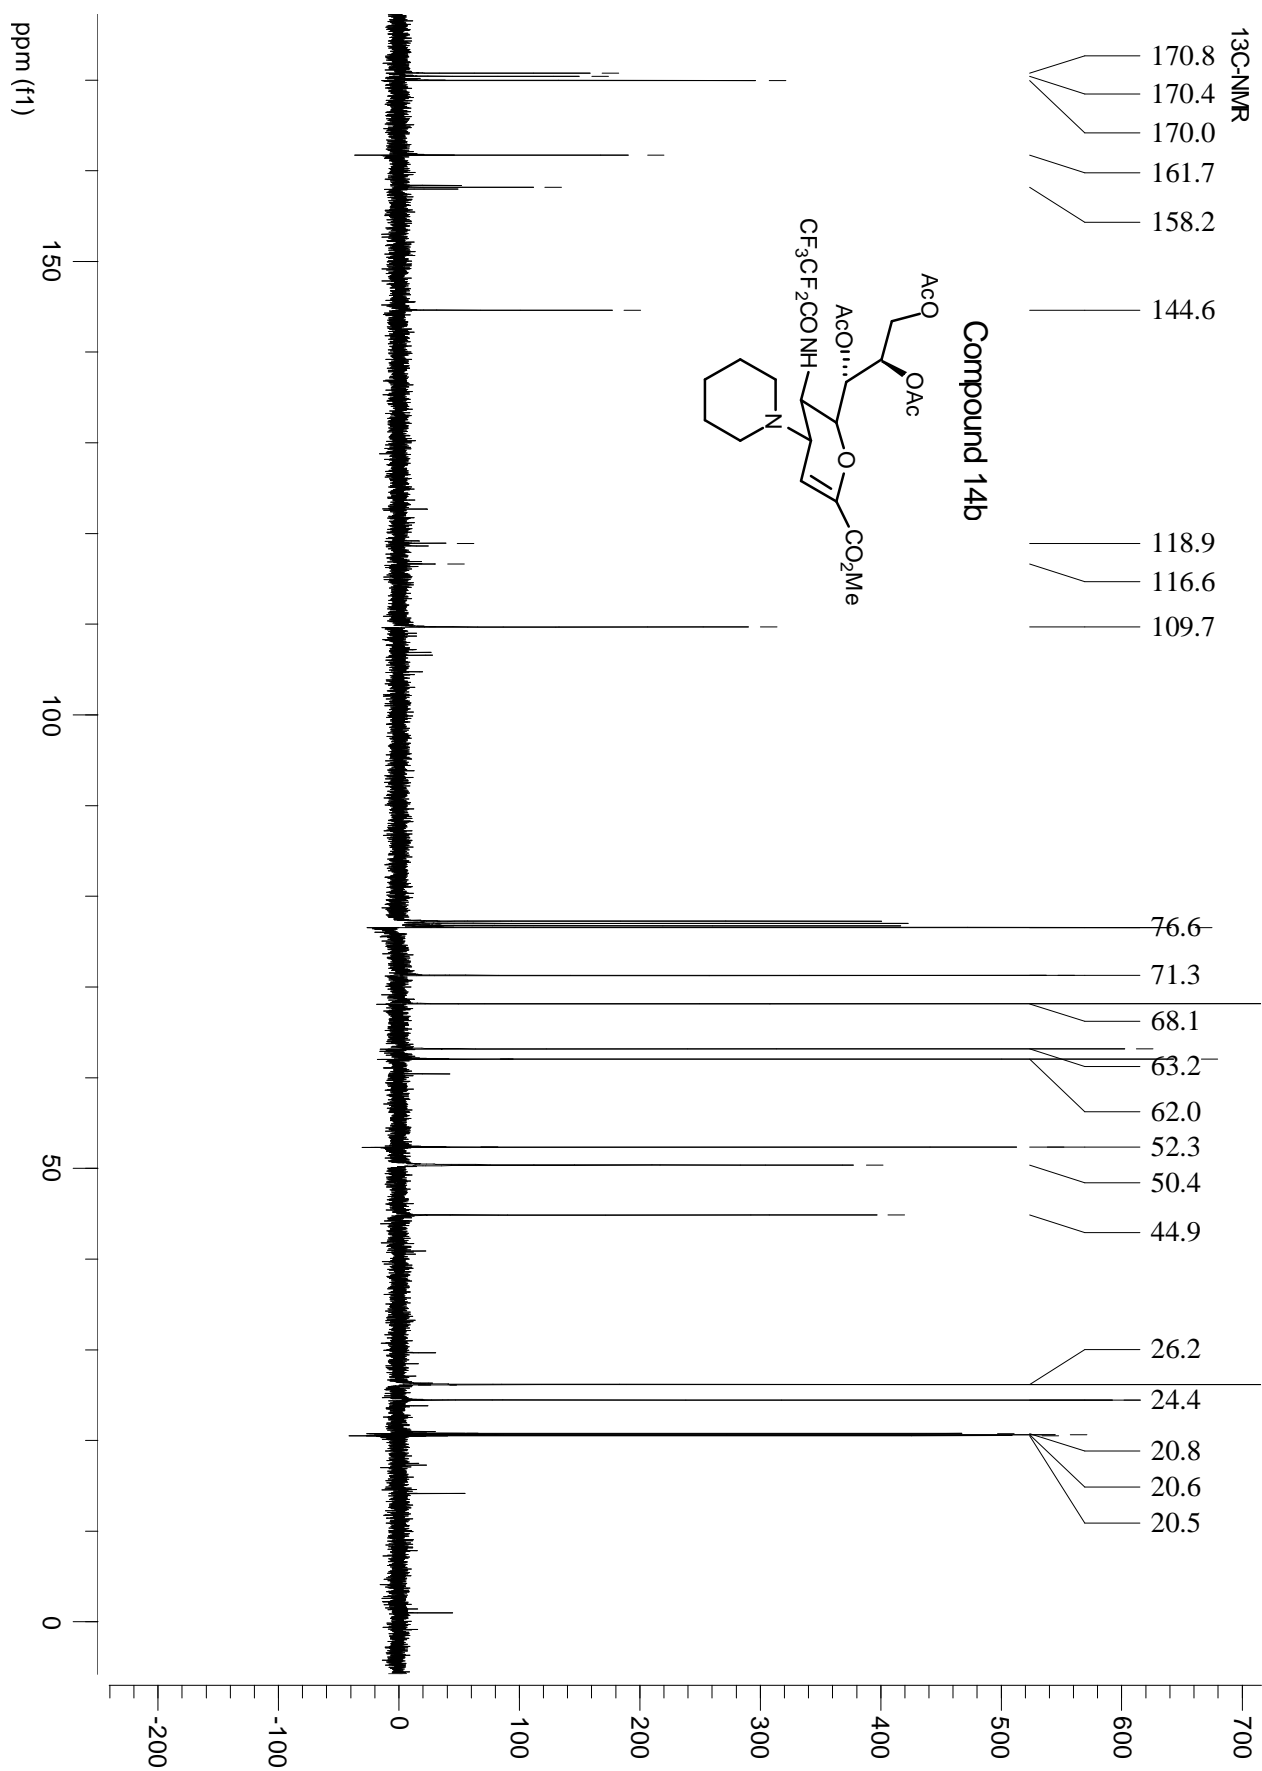

<sup>1</sup>H-NMR

Compound 13c

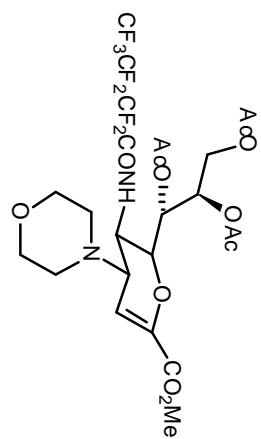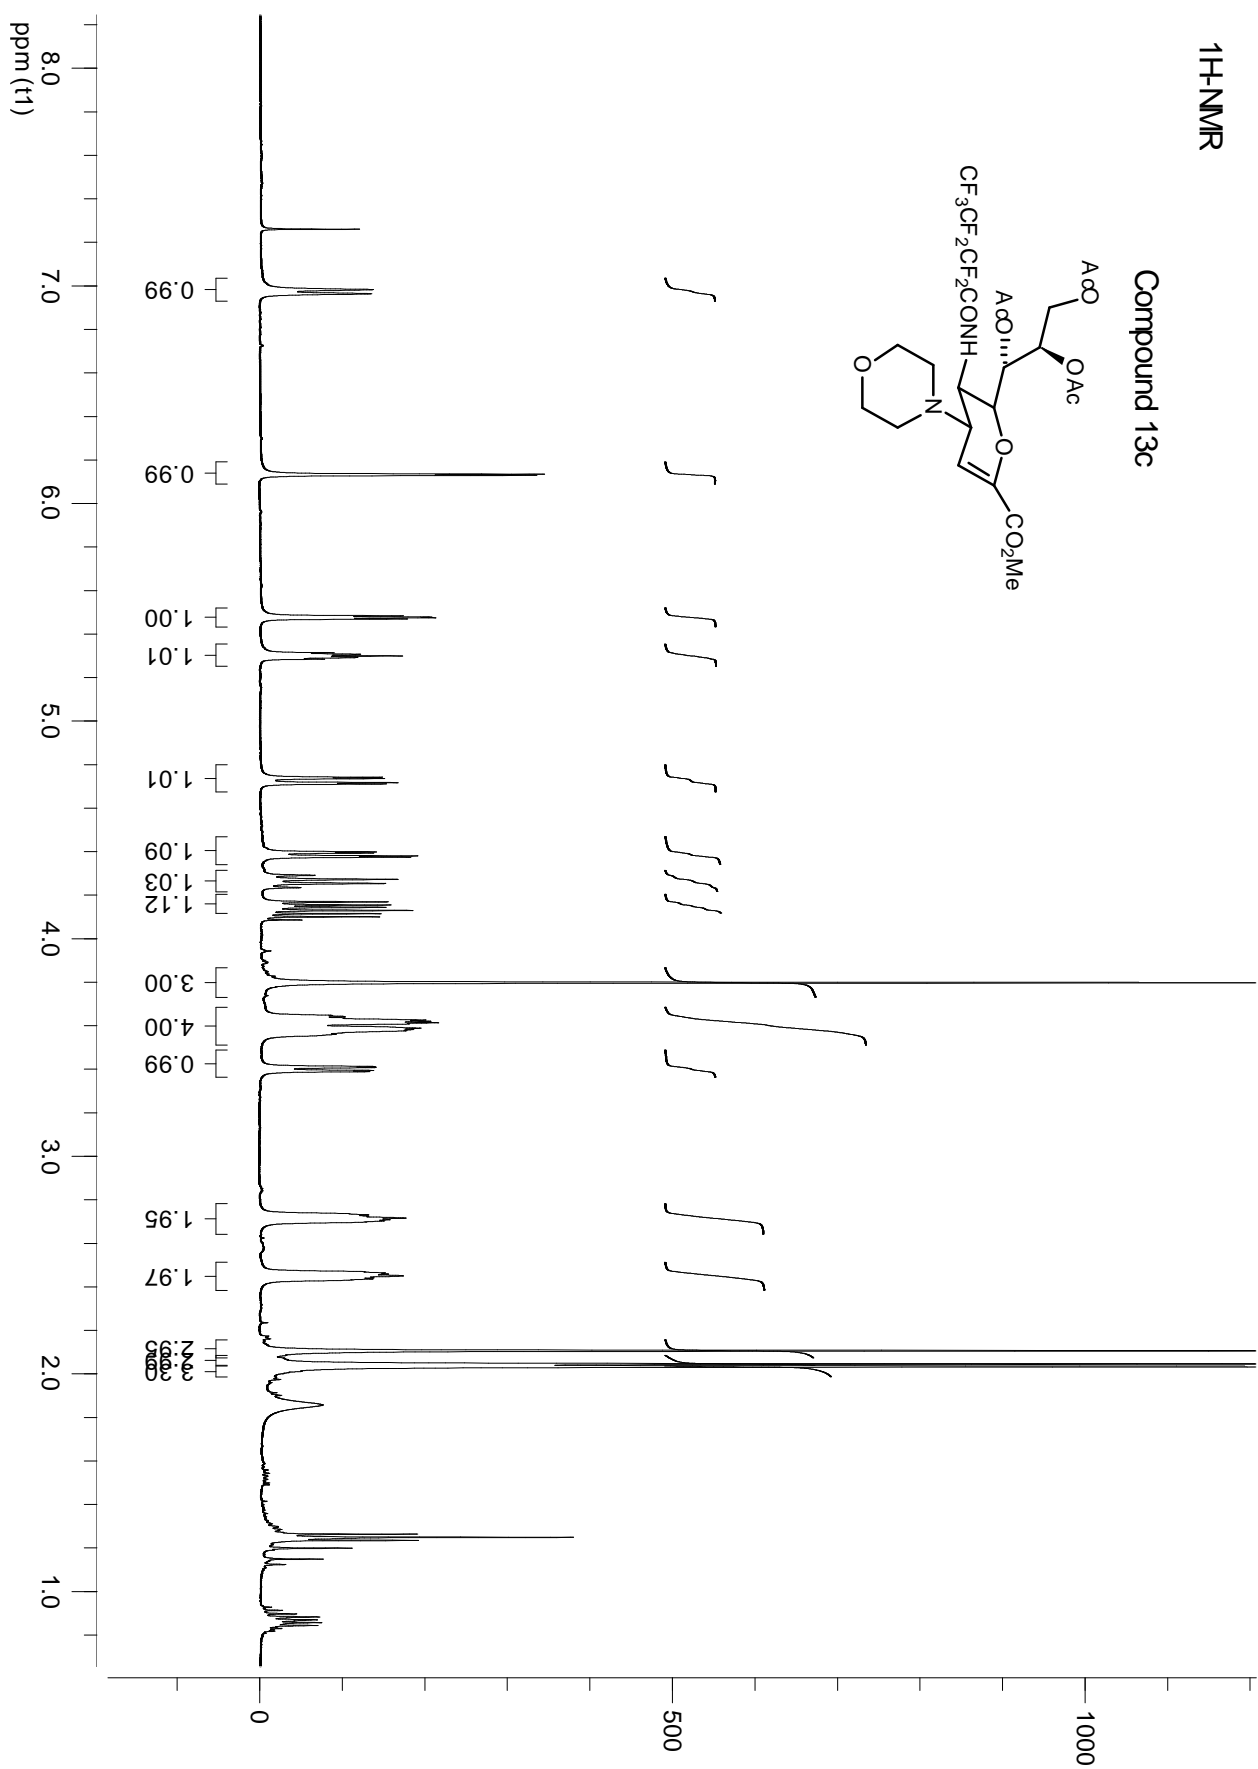

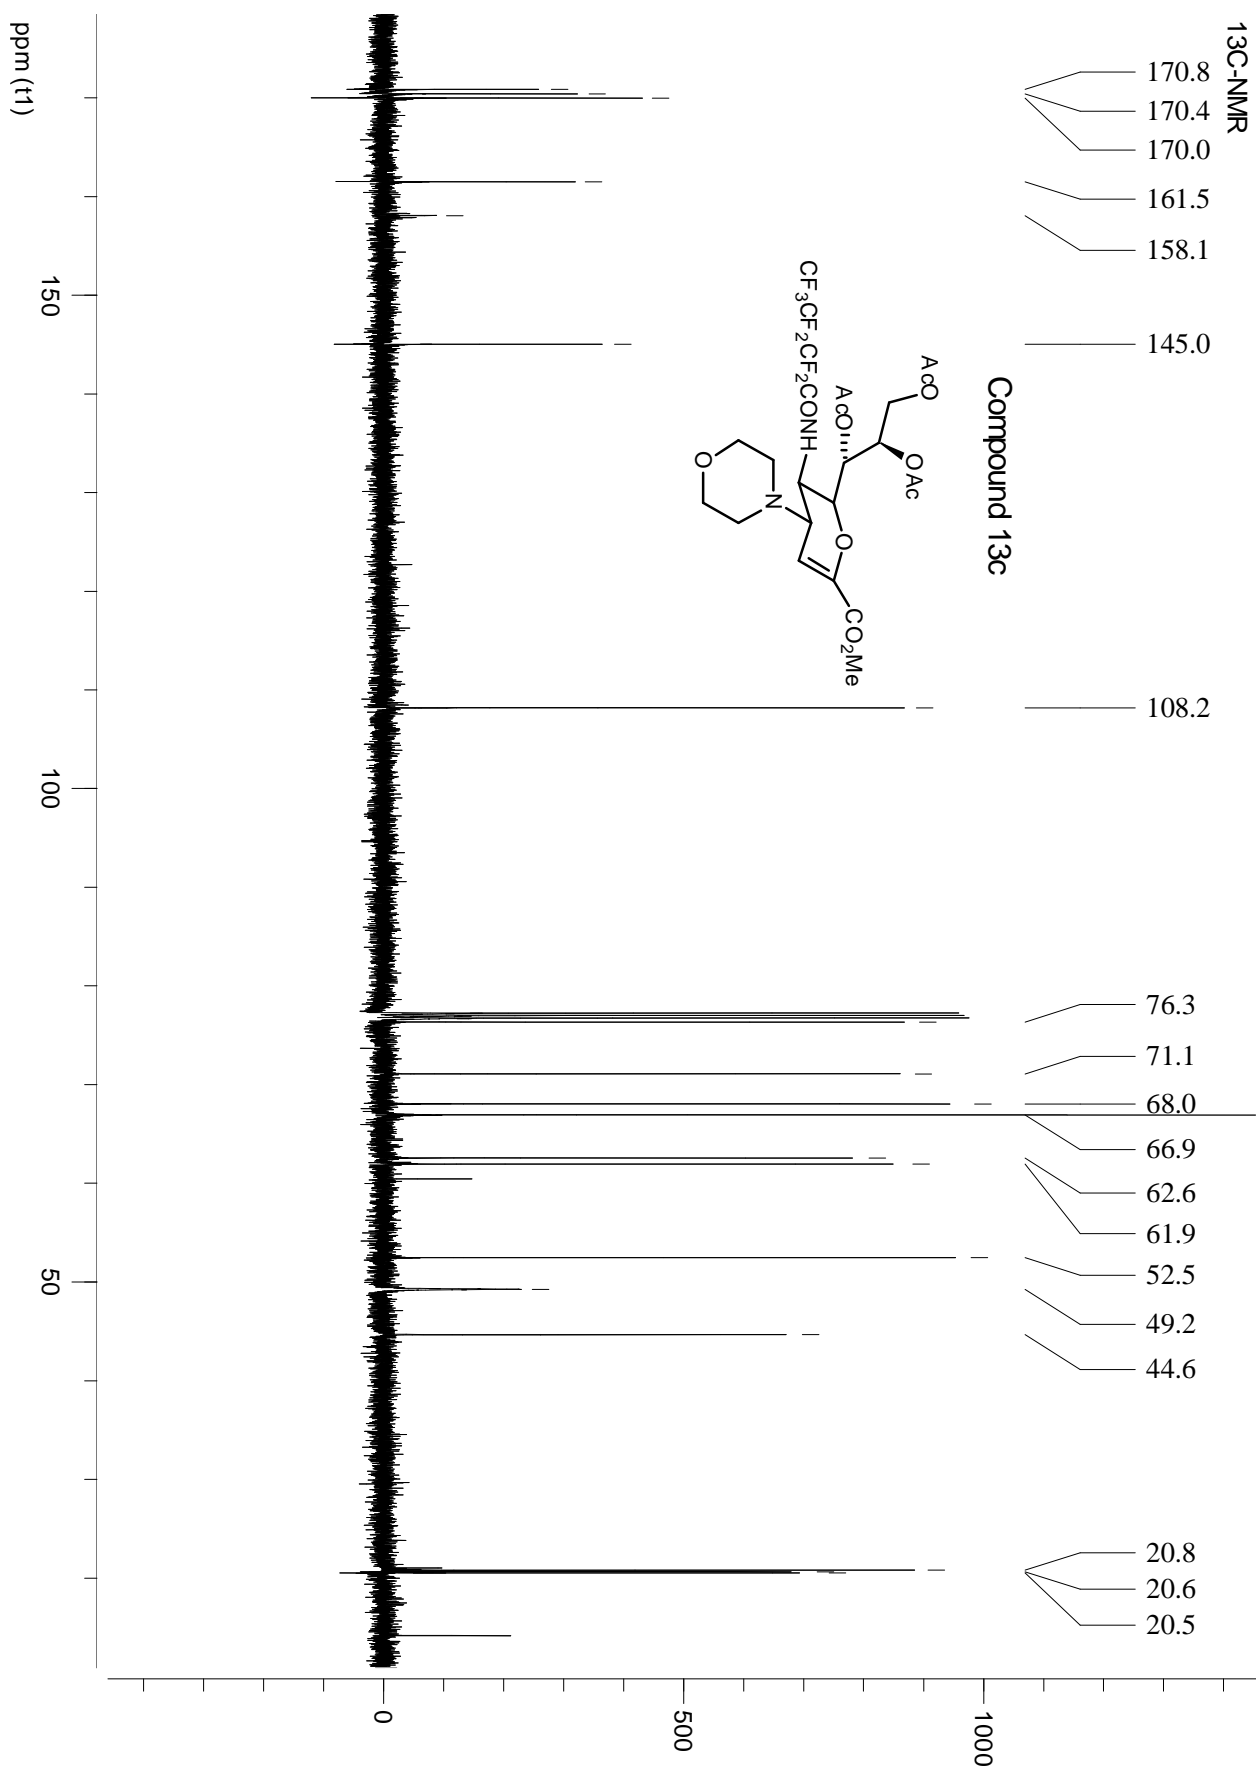

<sup>1</sup>H-NMR

Compound 14c

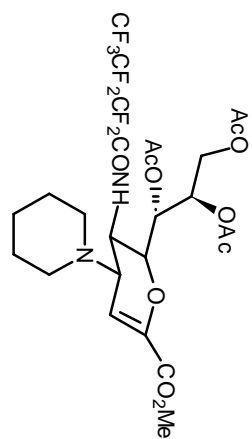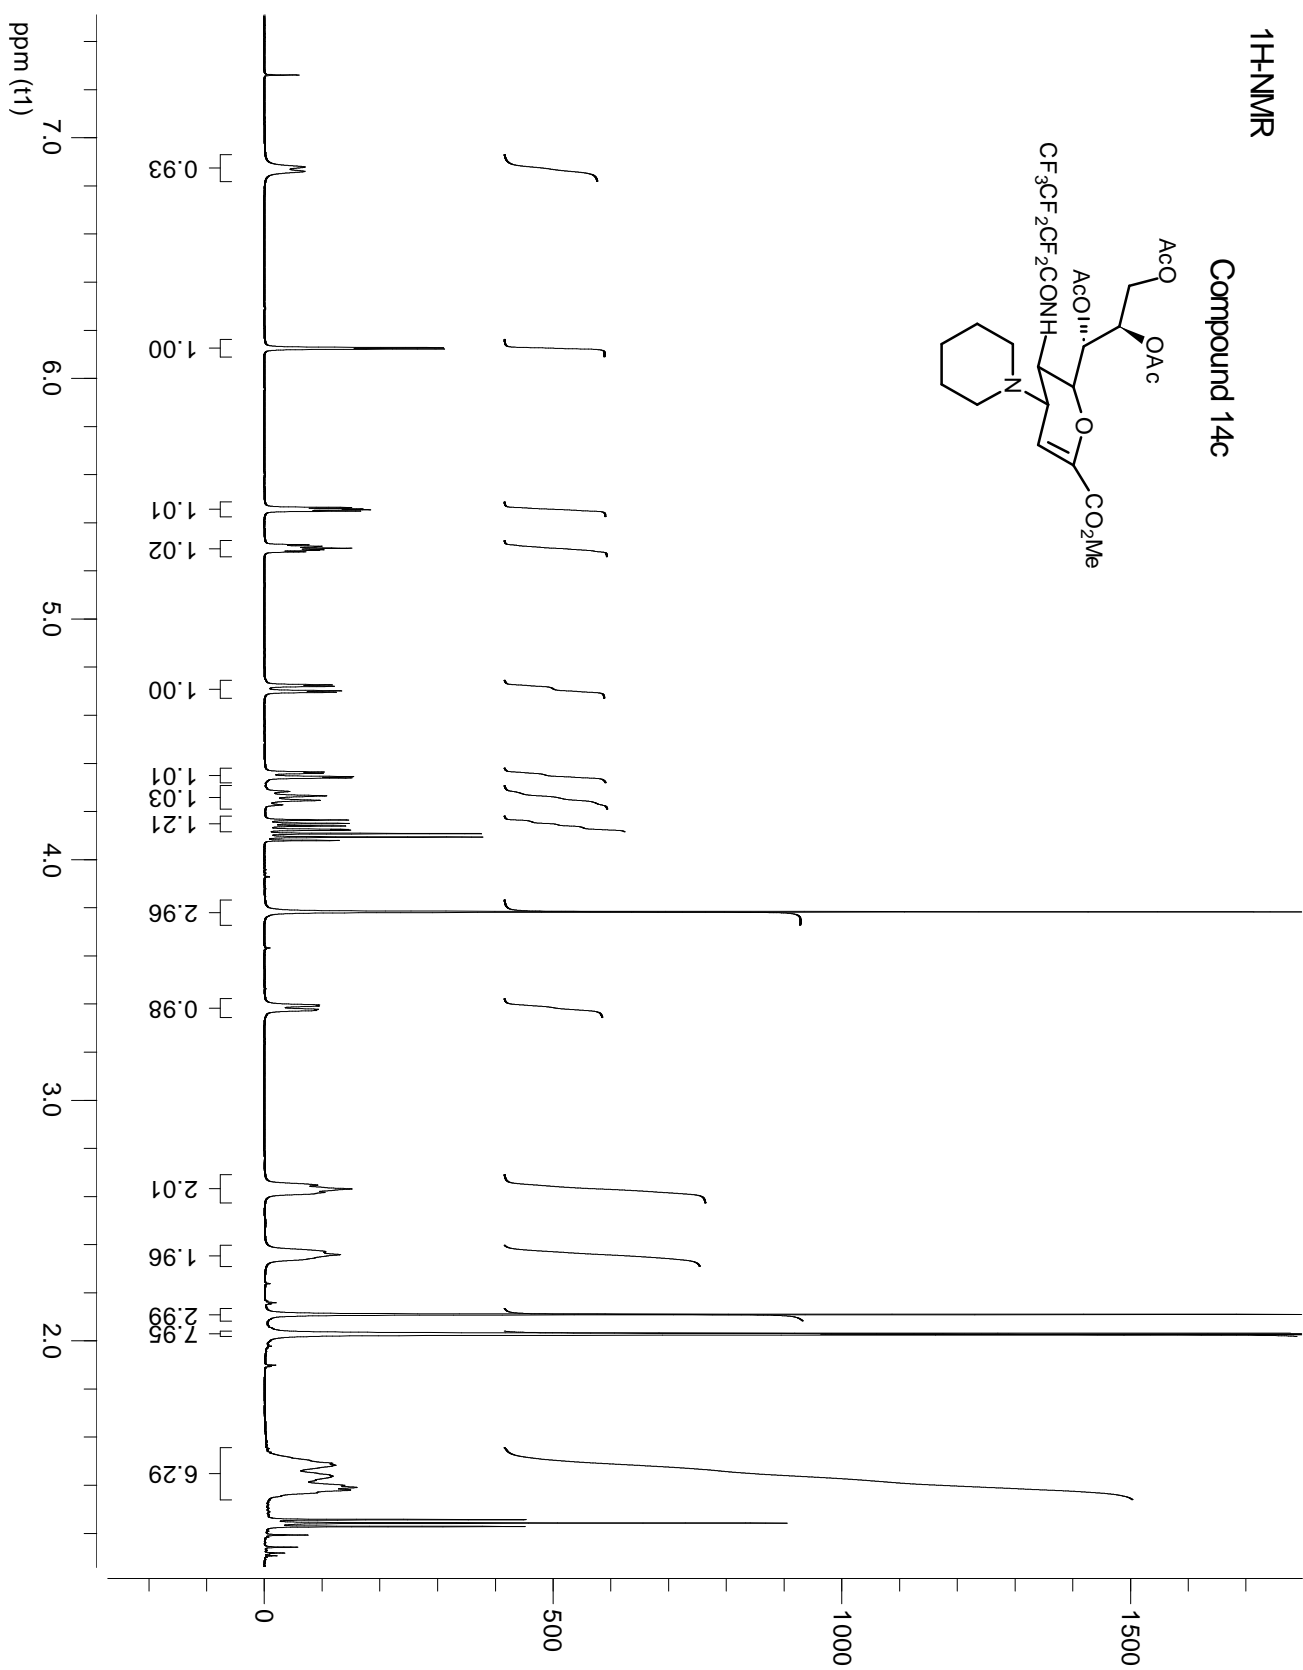



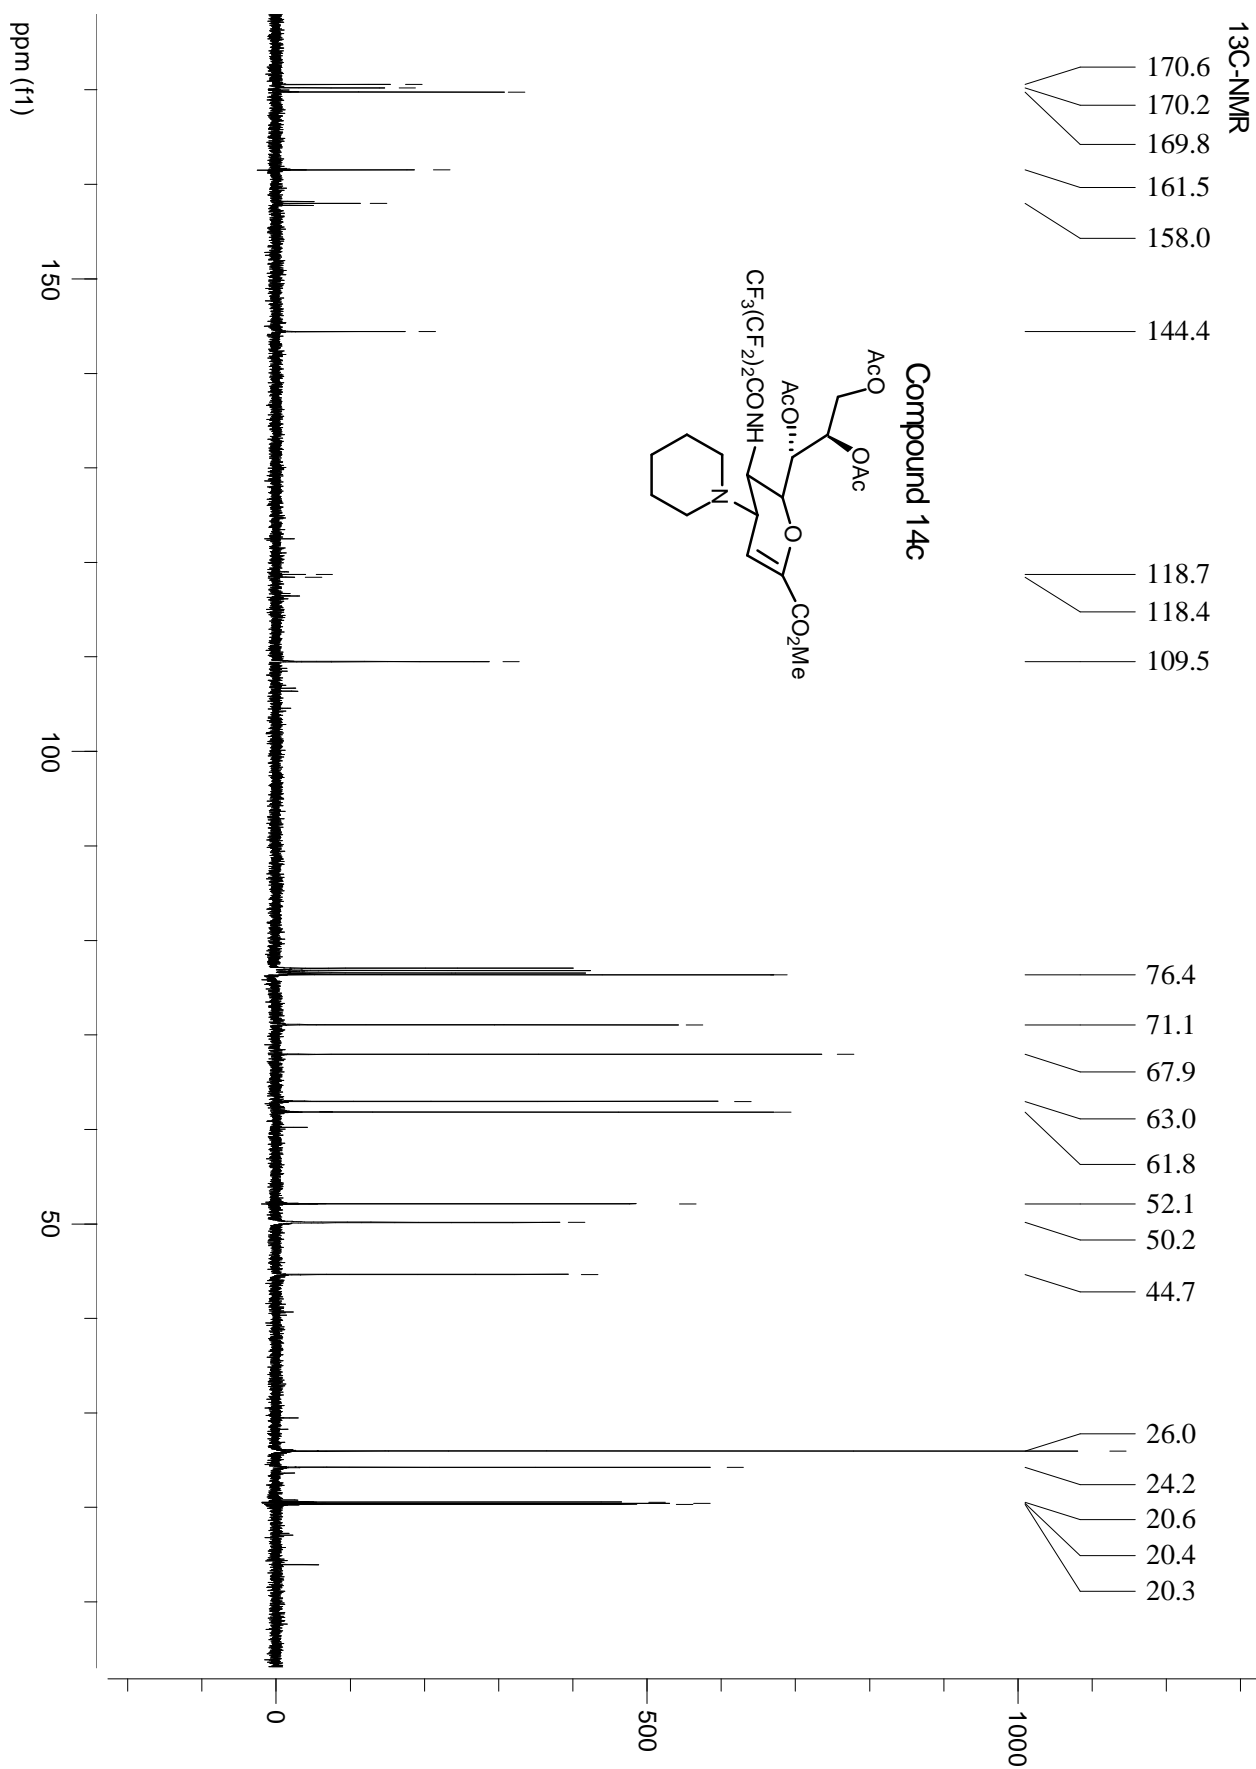

<sup>1</sup>H-NMR

Compound 6d

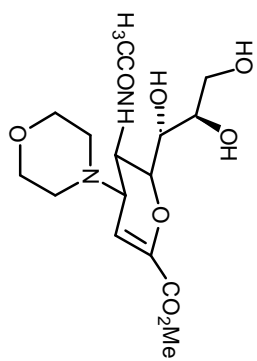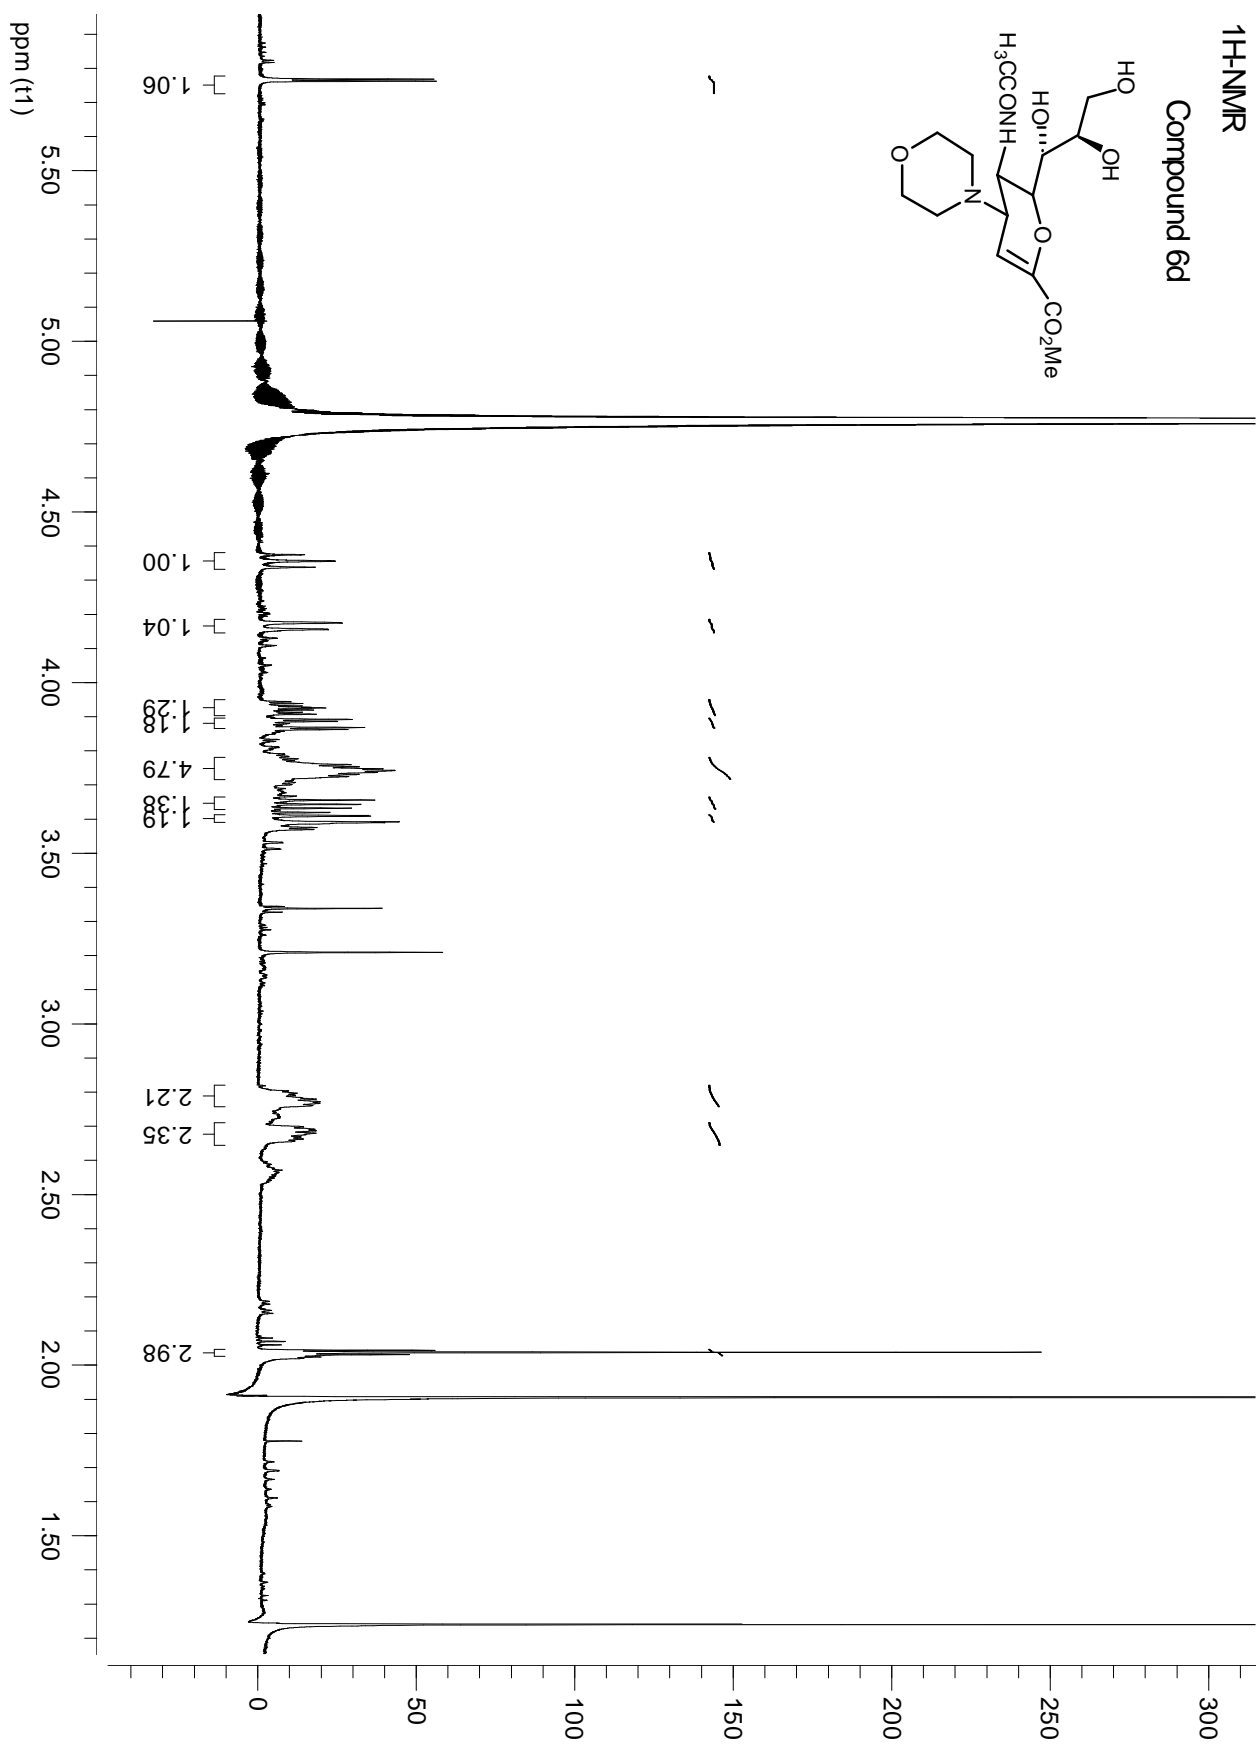

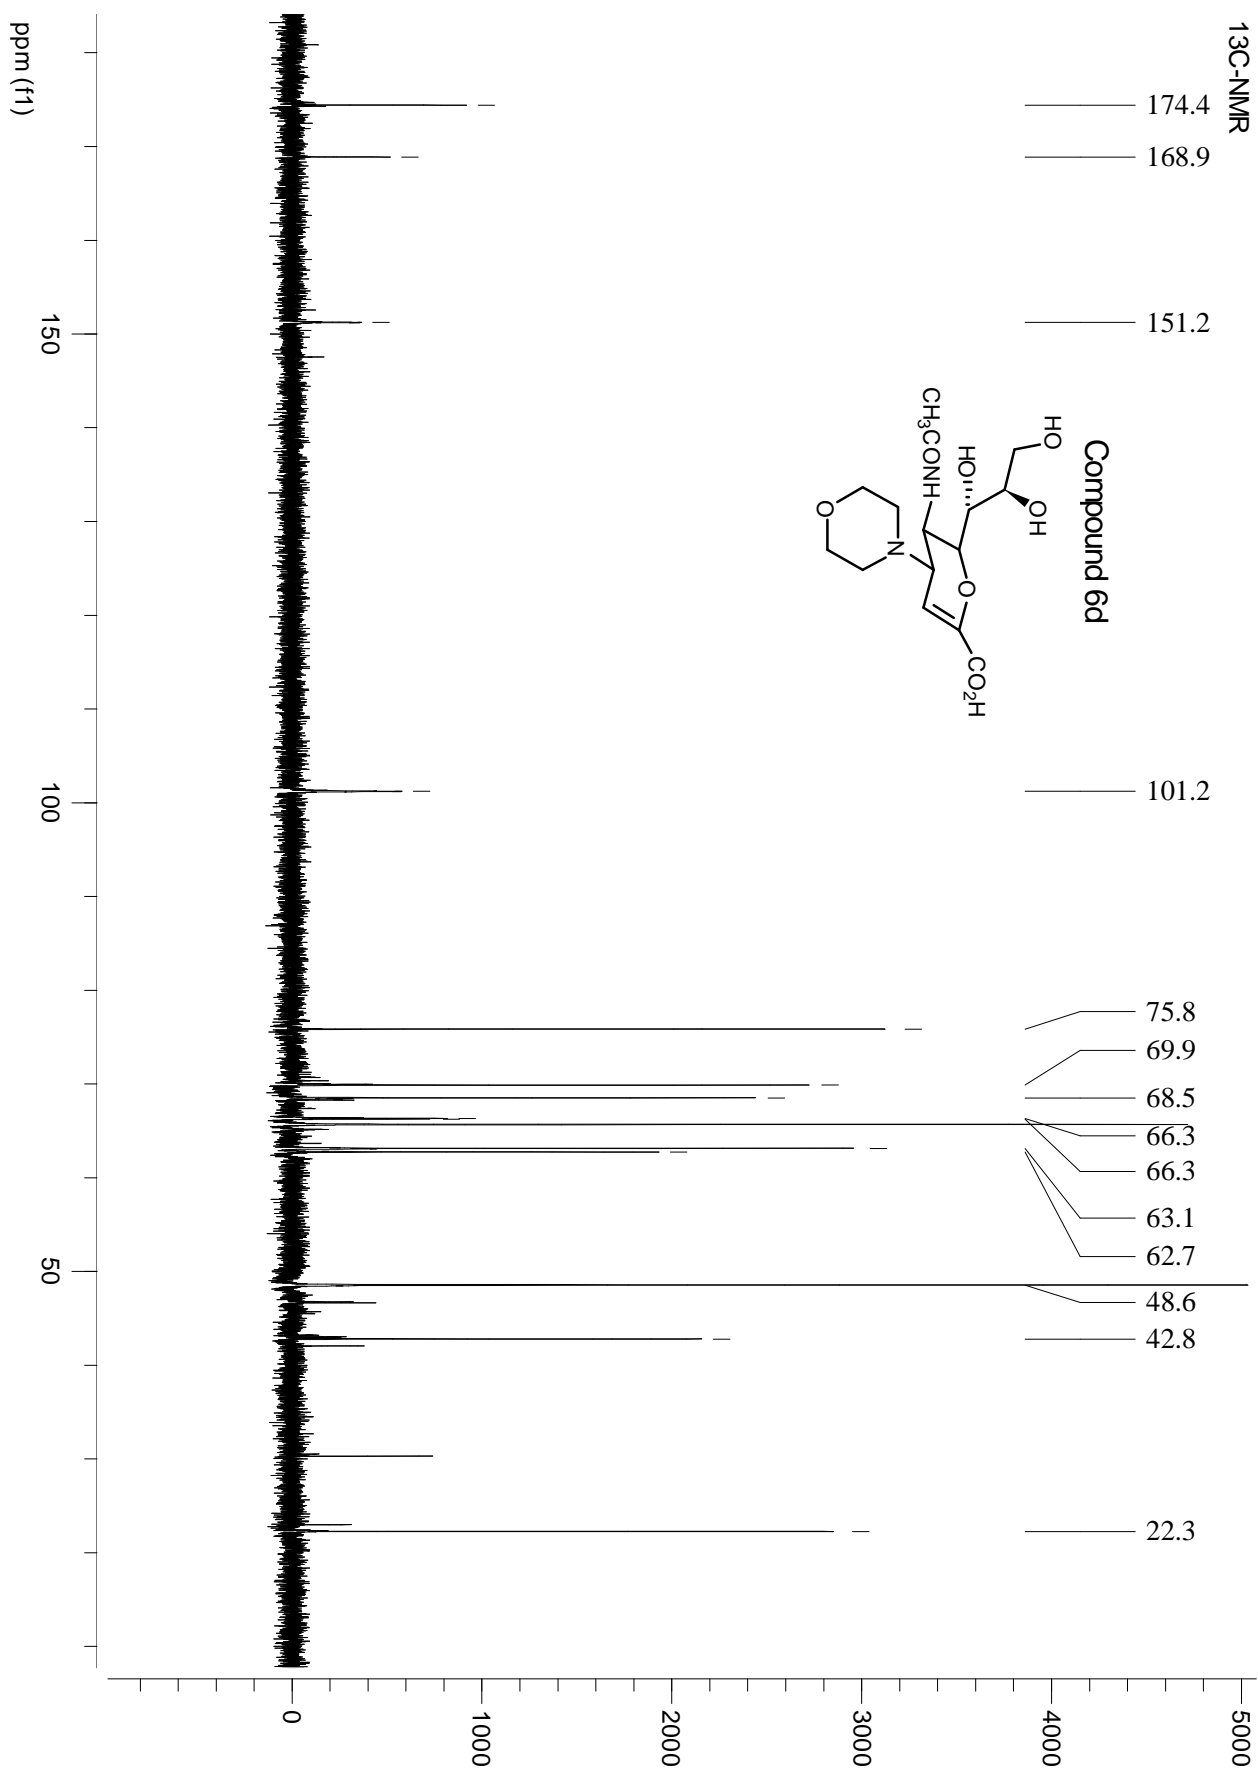

<sup>1</sup>H-NMR

Compound 7d

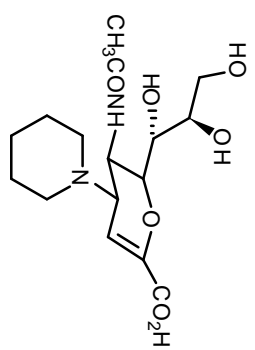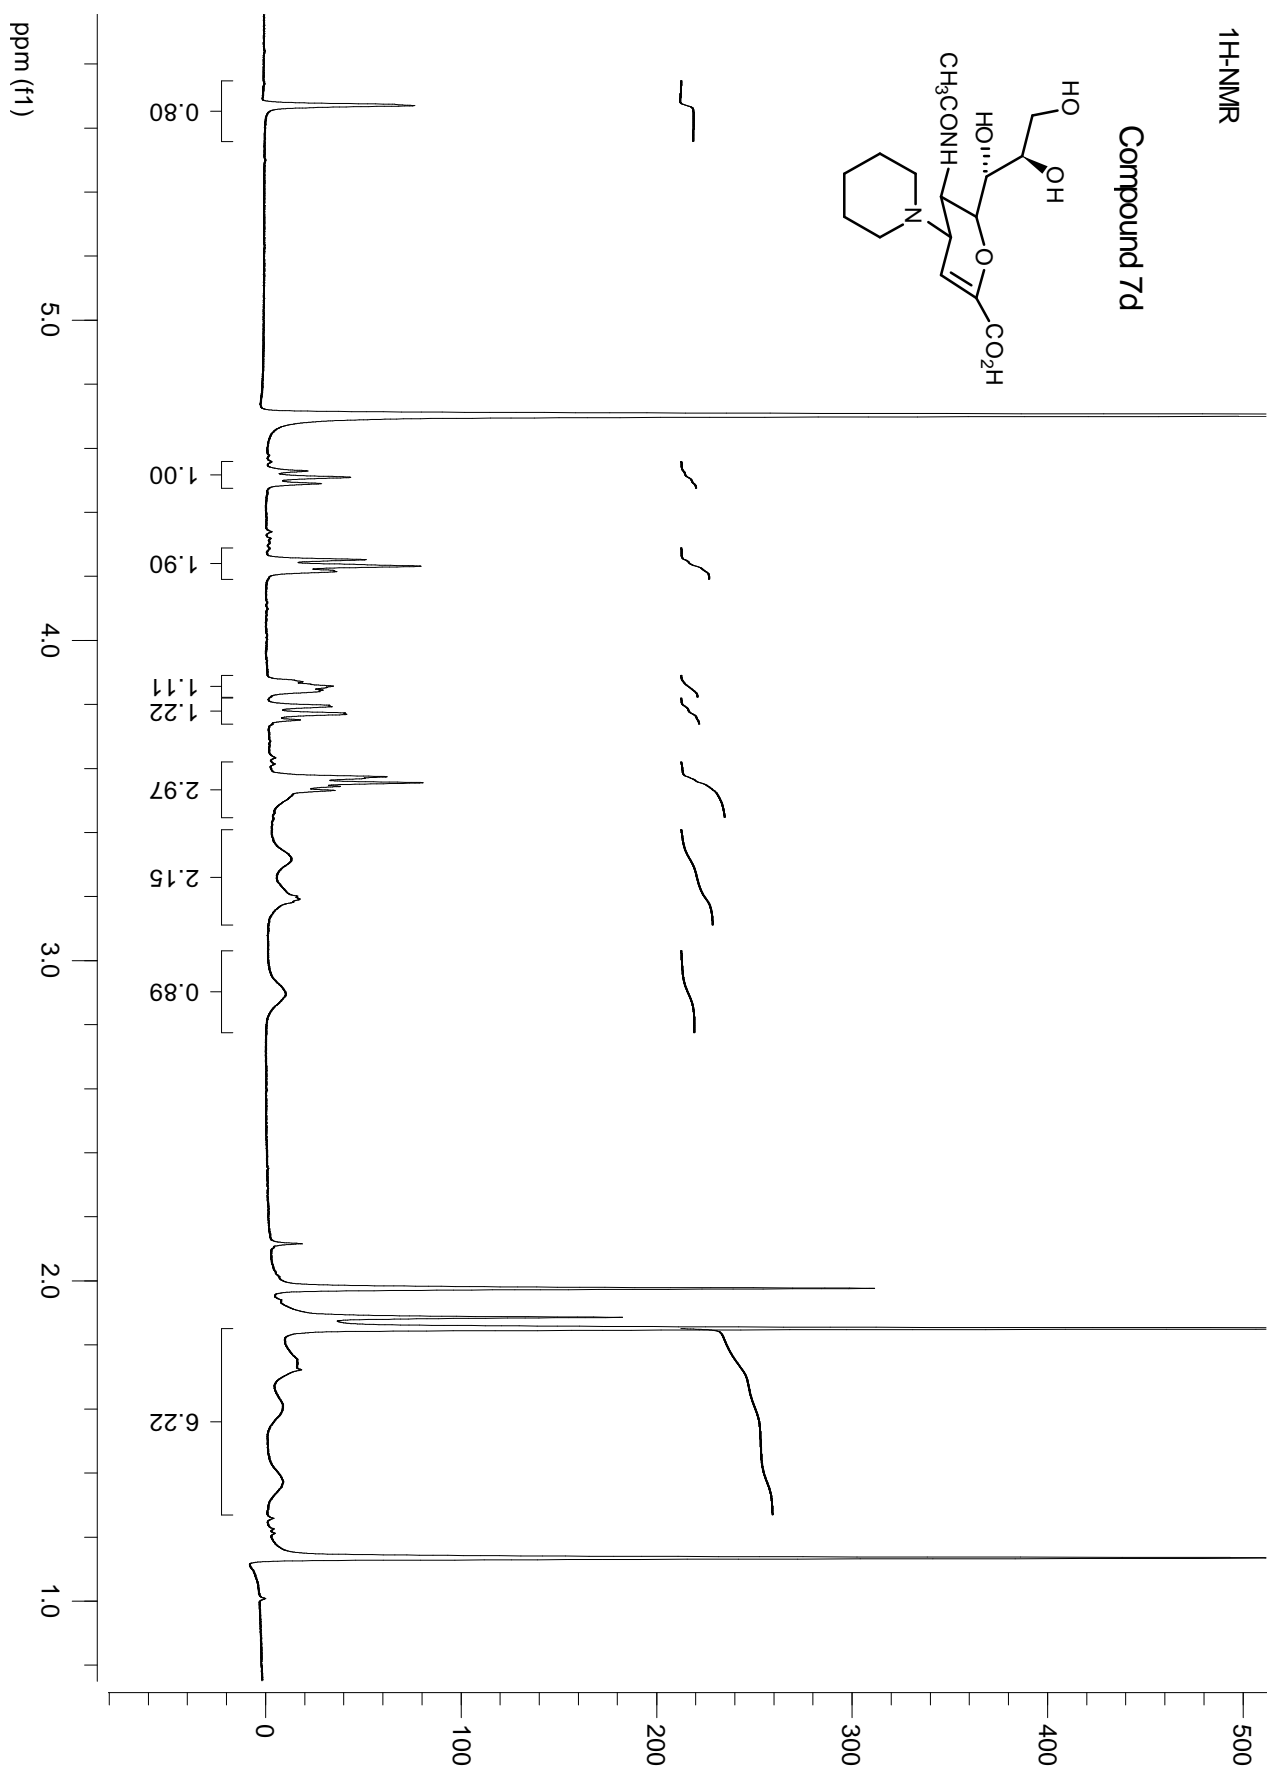

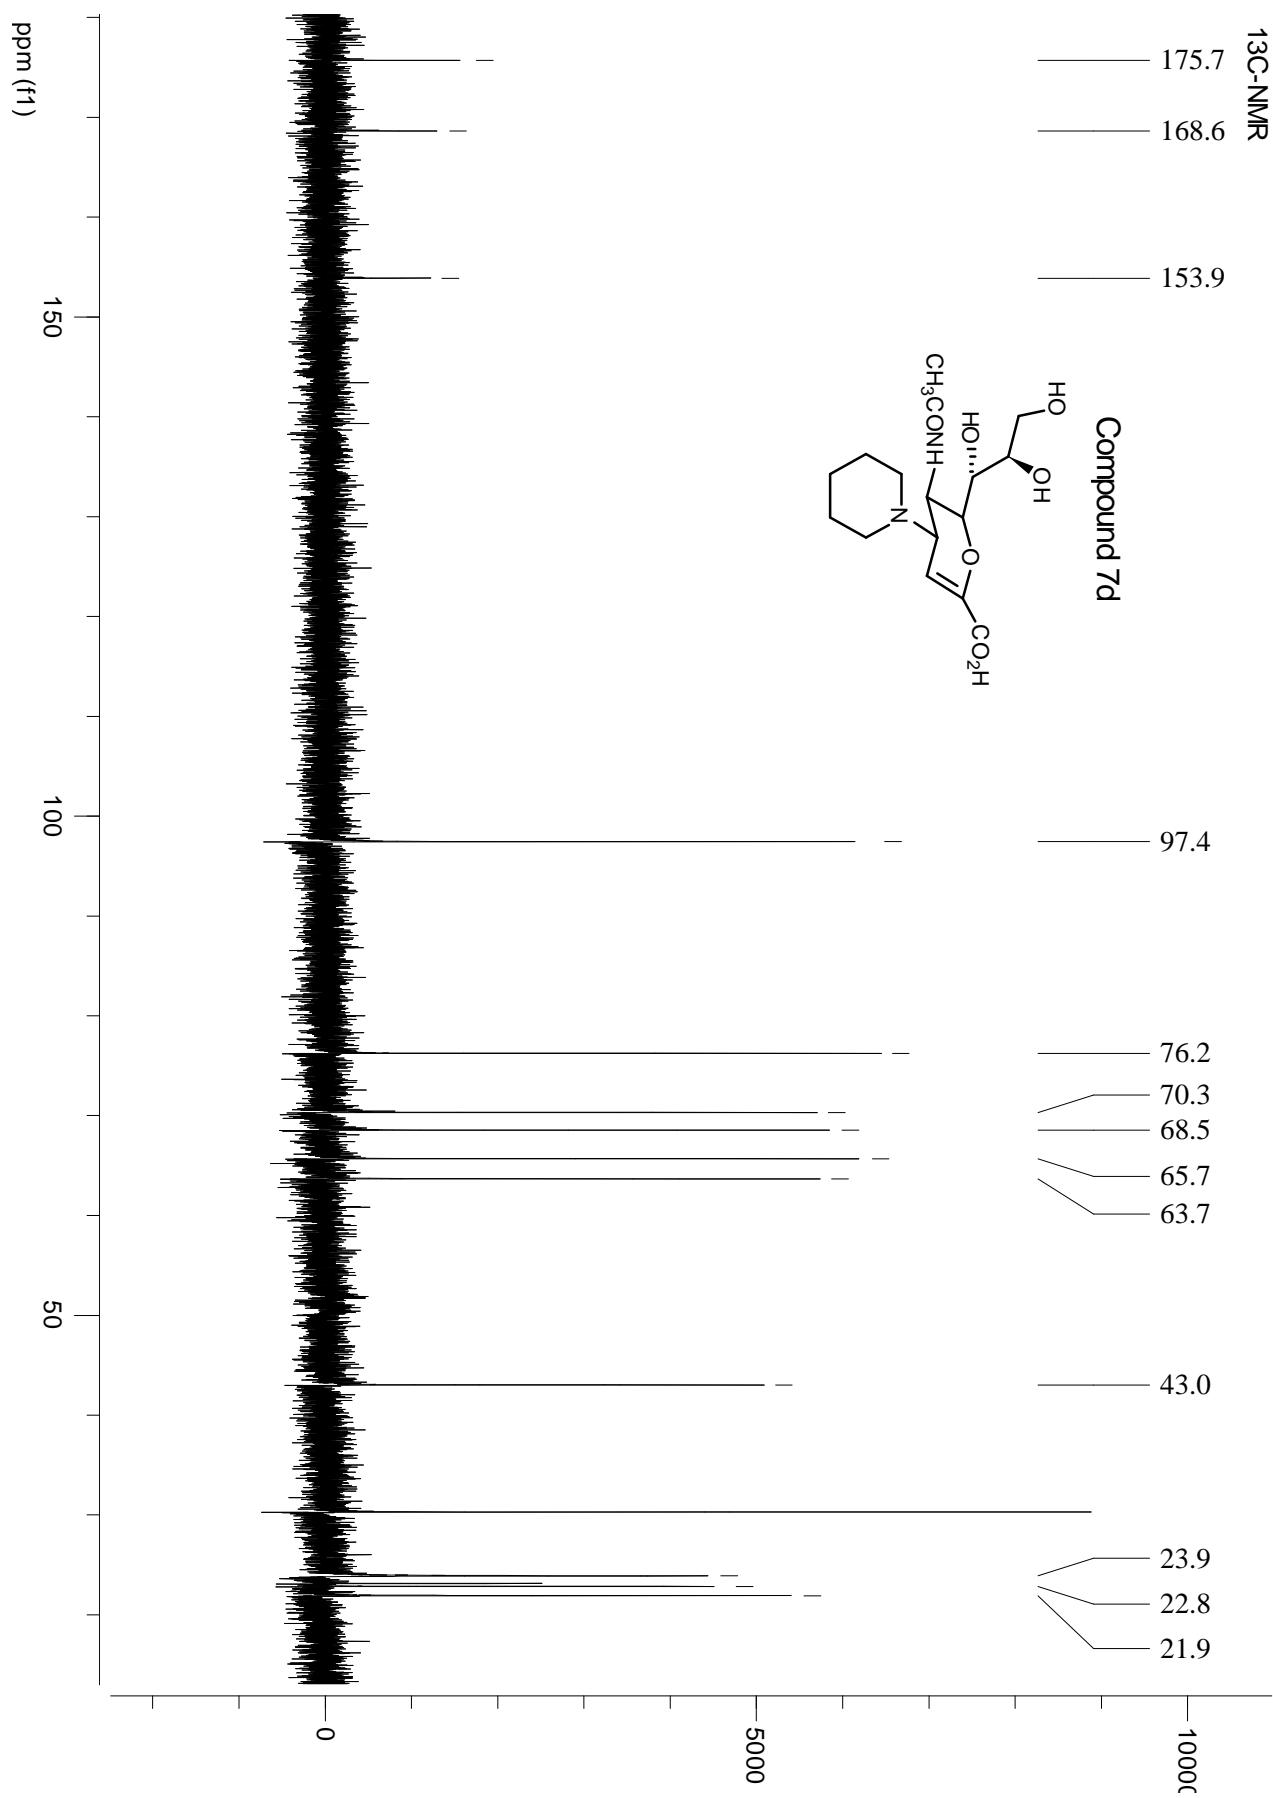

<sup>1</sup>H-NMR

Compound 6a

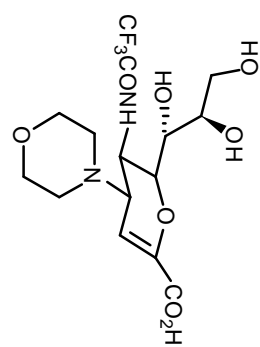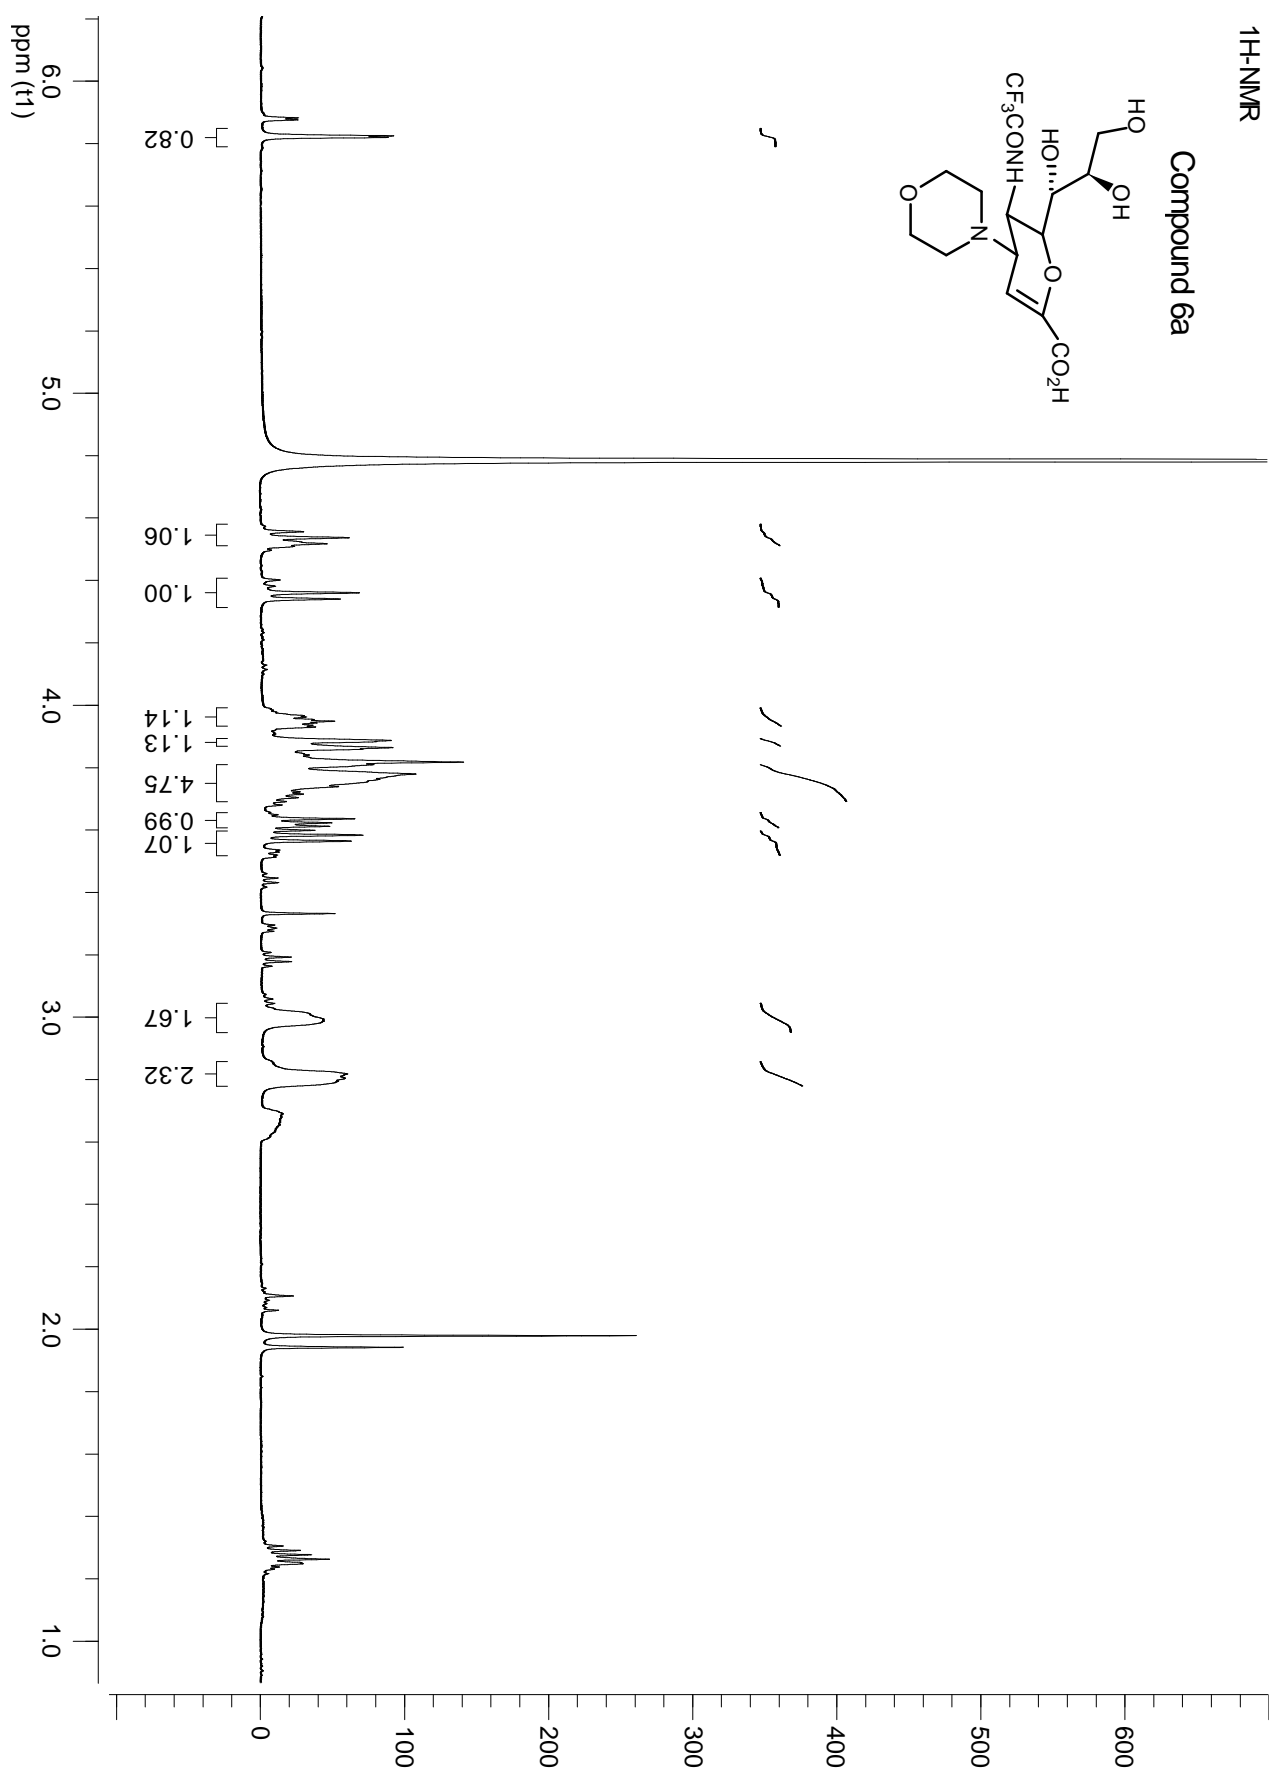

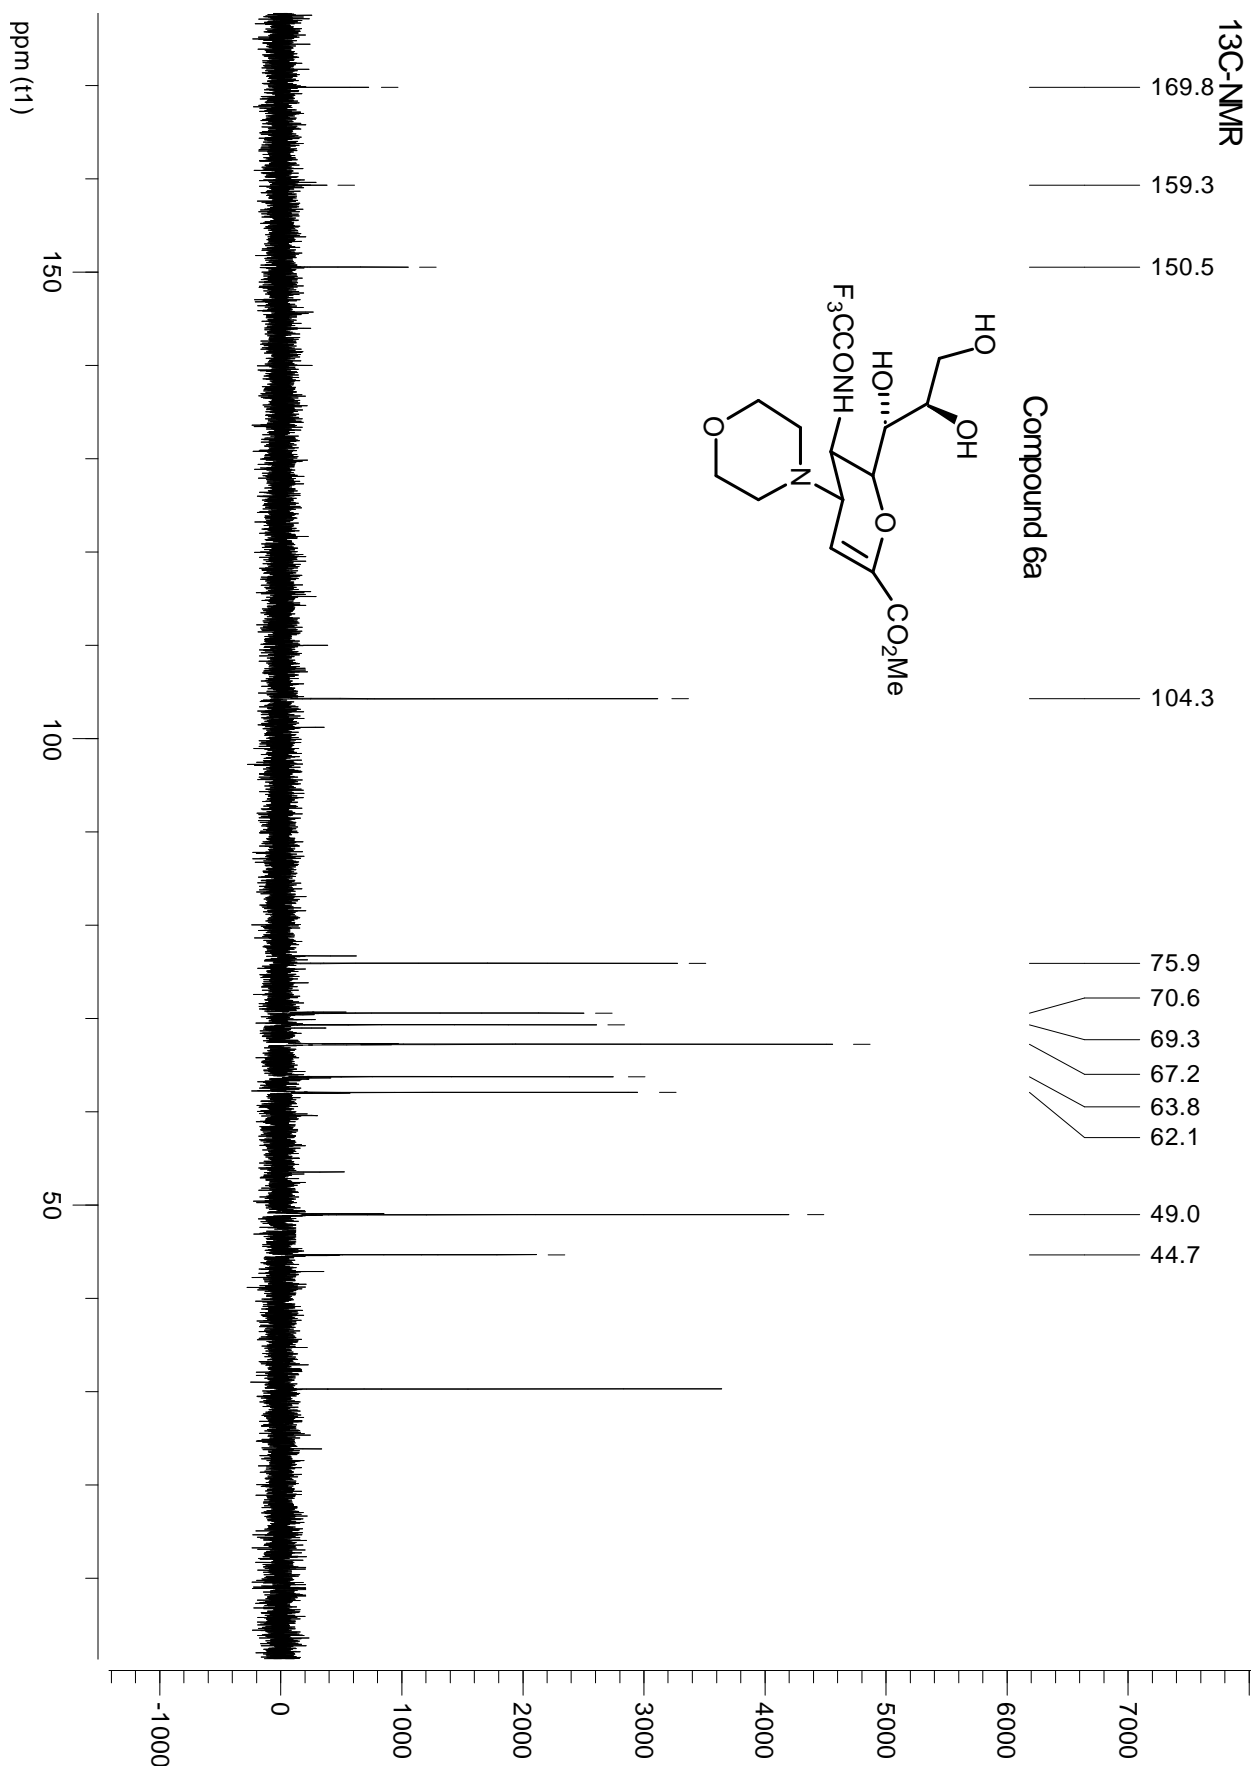

<sup>1</sup>H-NMR

Compound 7a

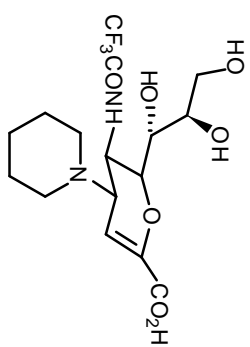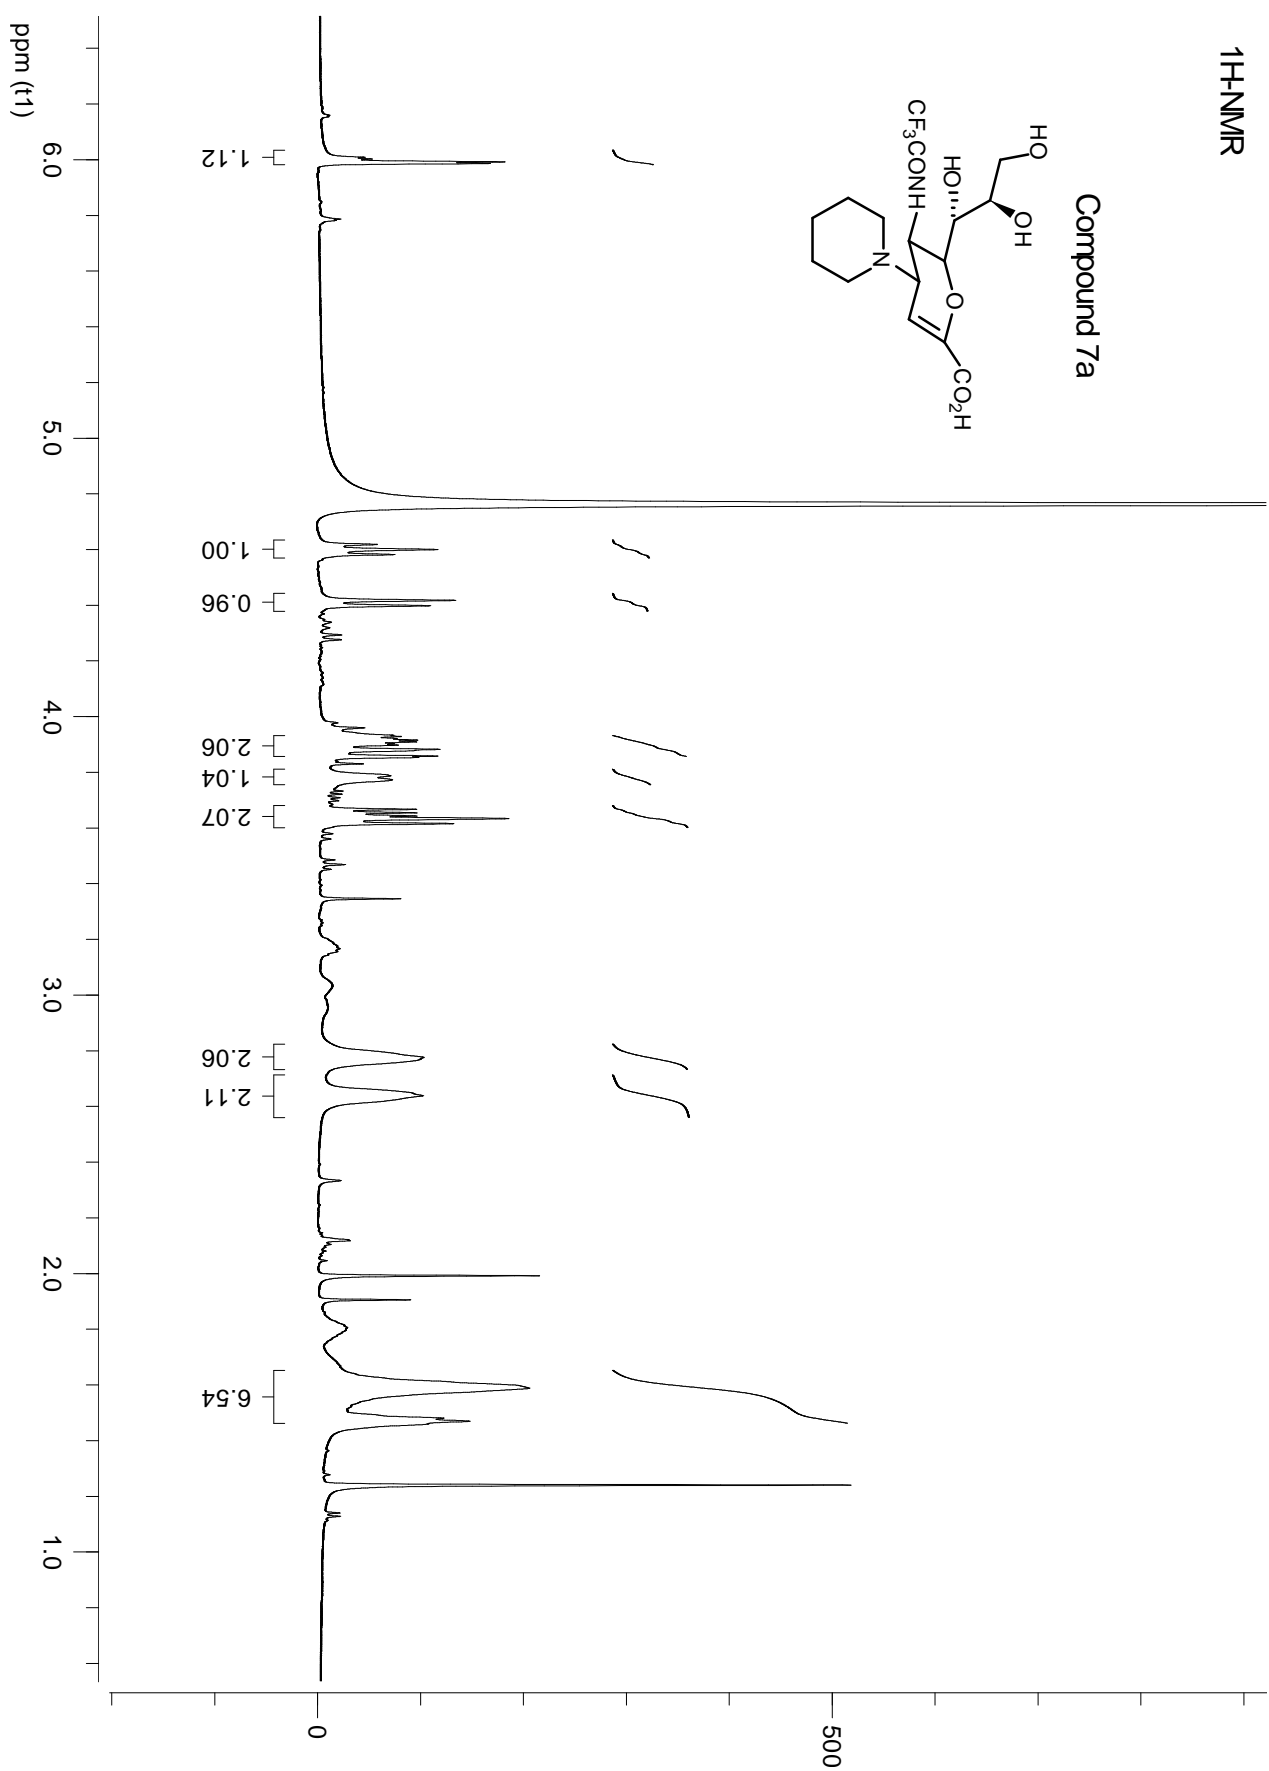



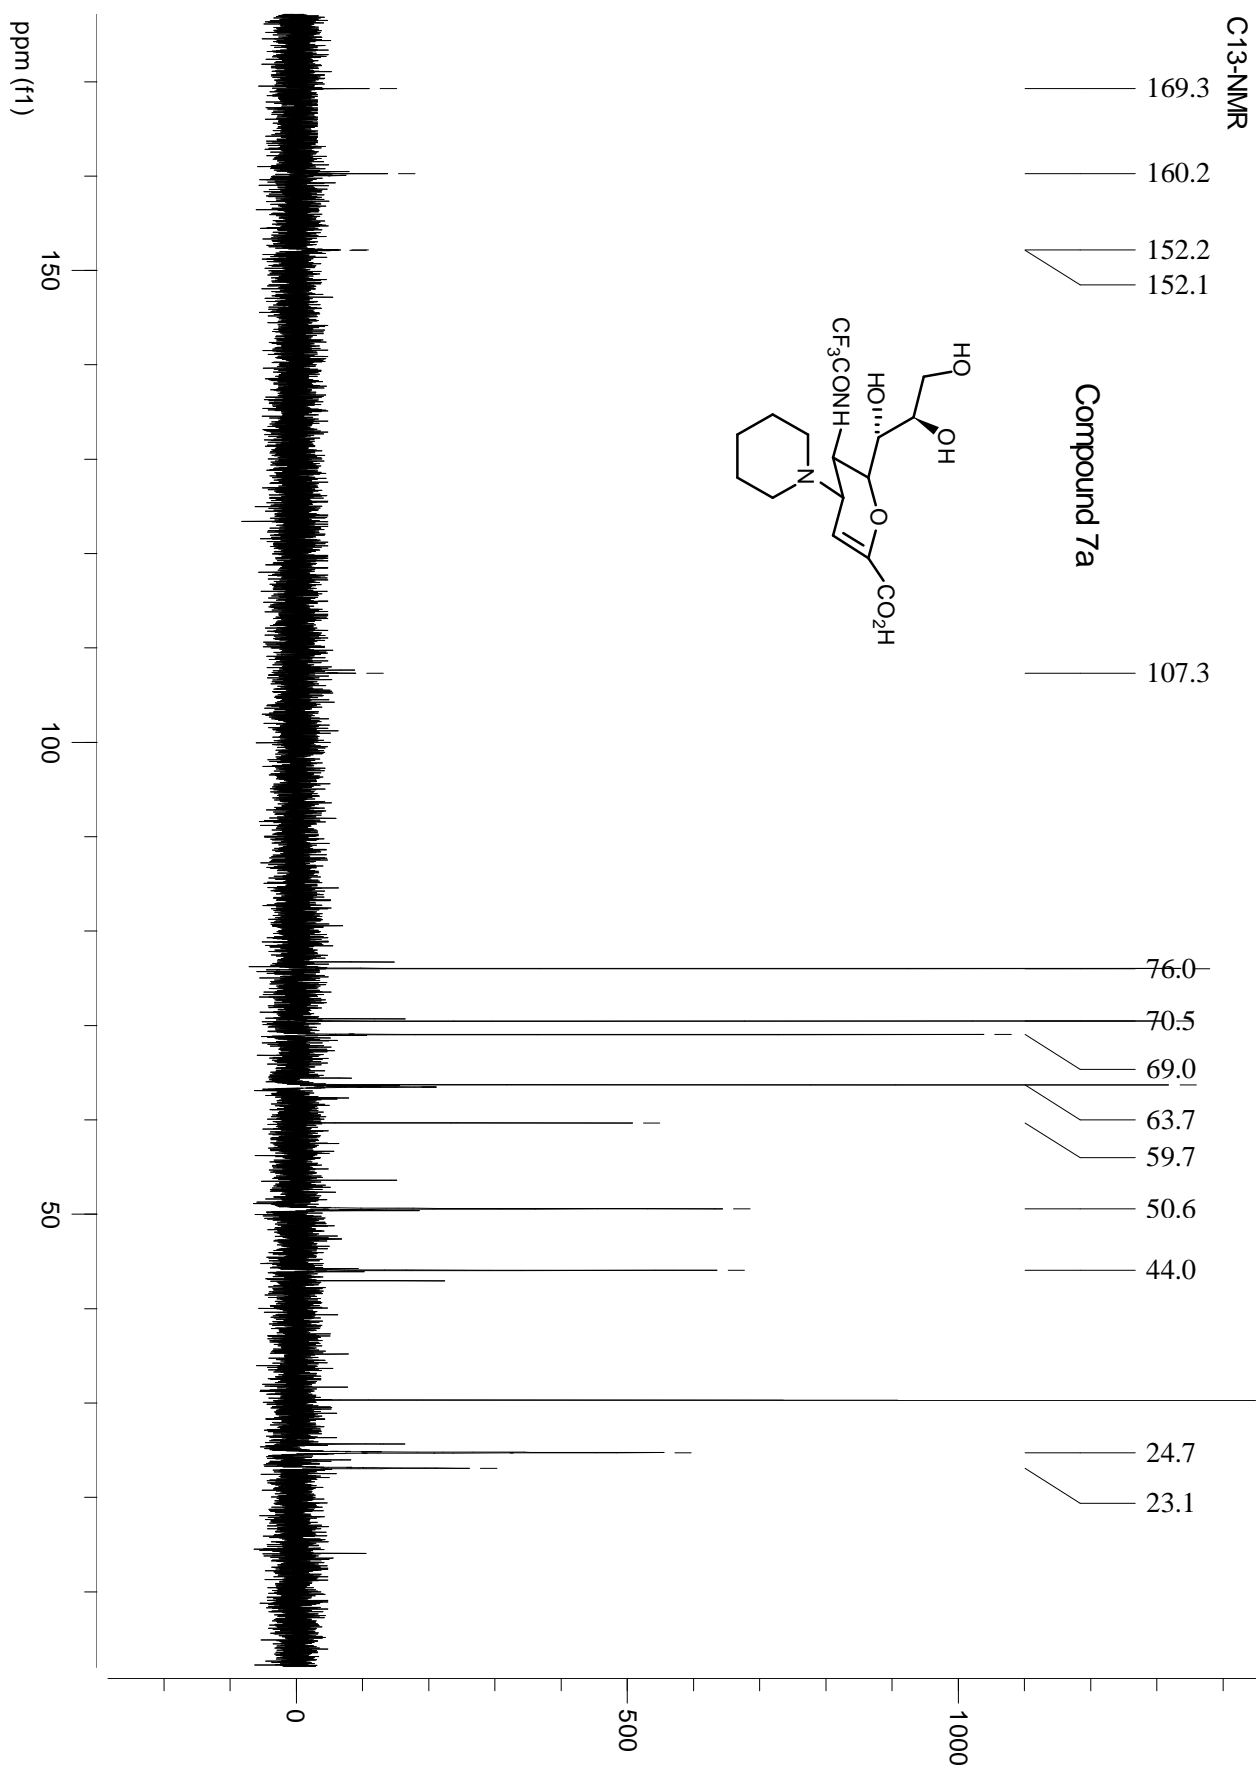

compound 6b

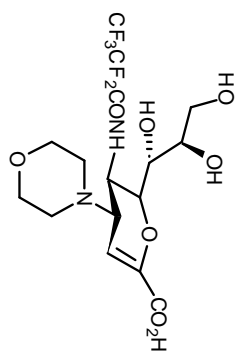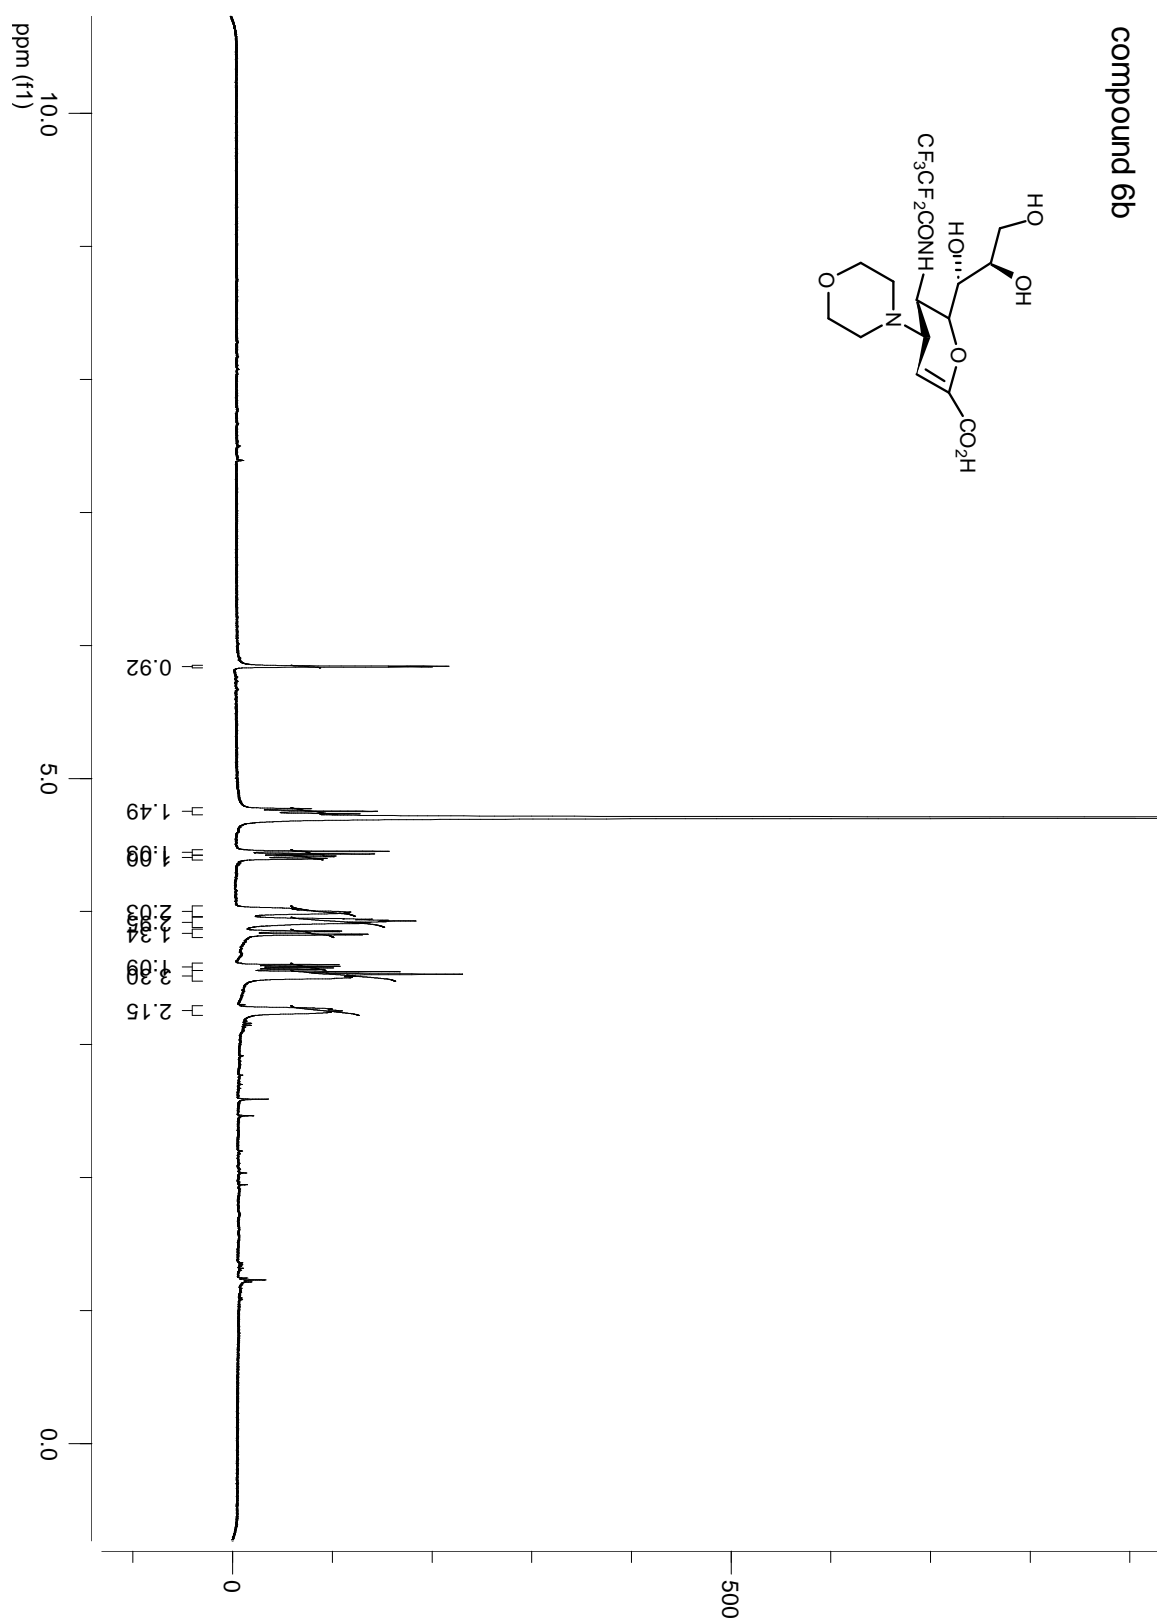

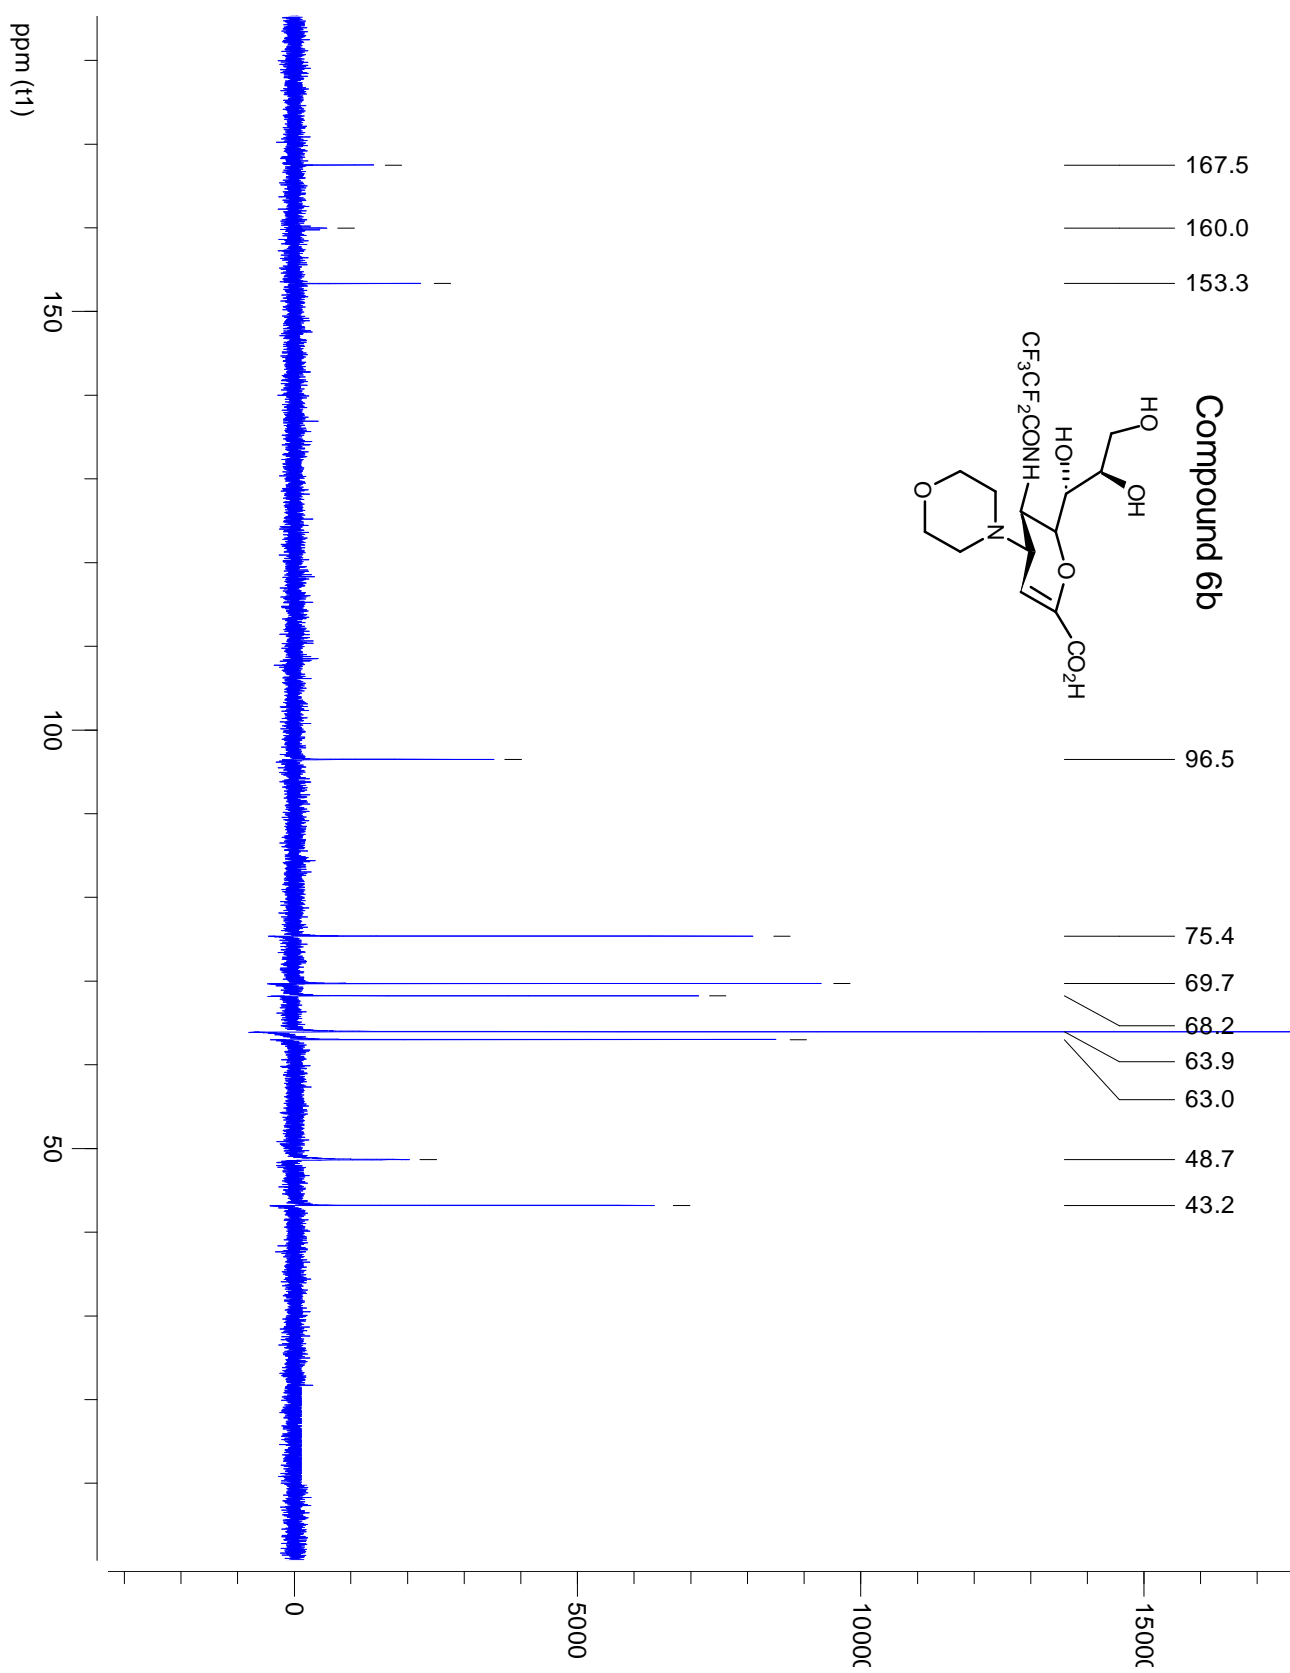

<sup>1</sup>H-NMR

Compound 7b

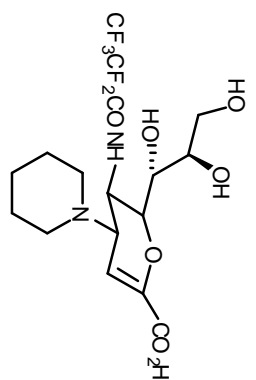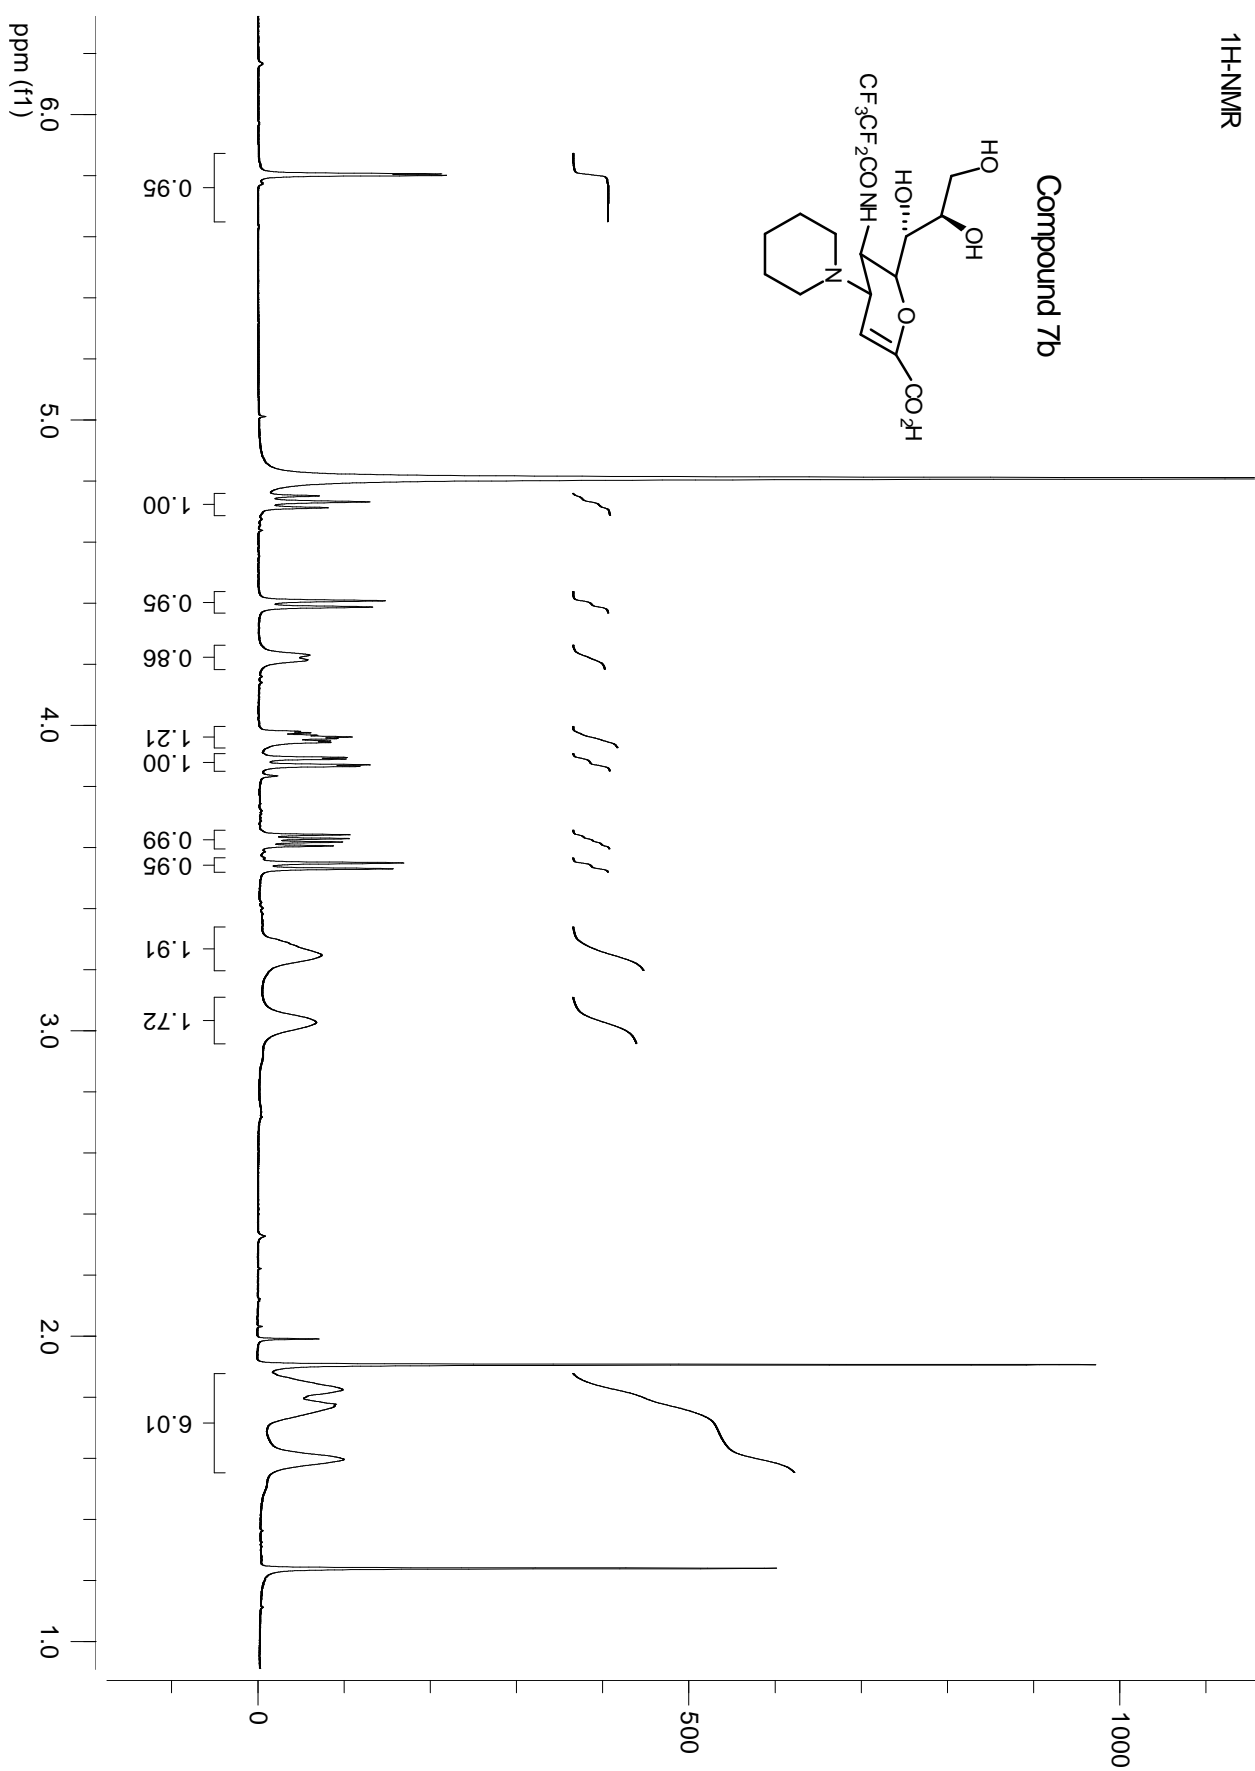

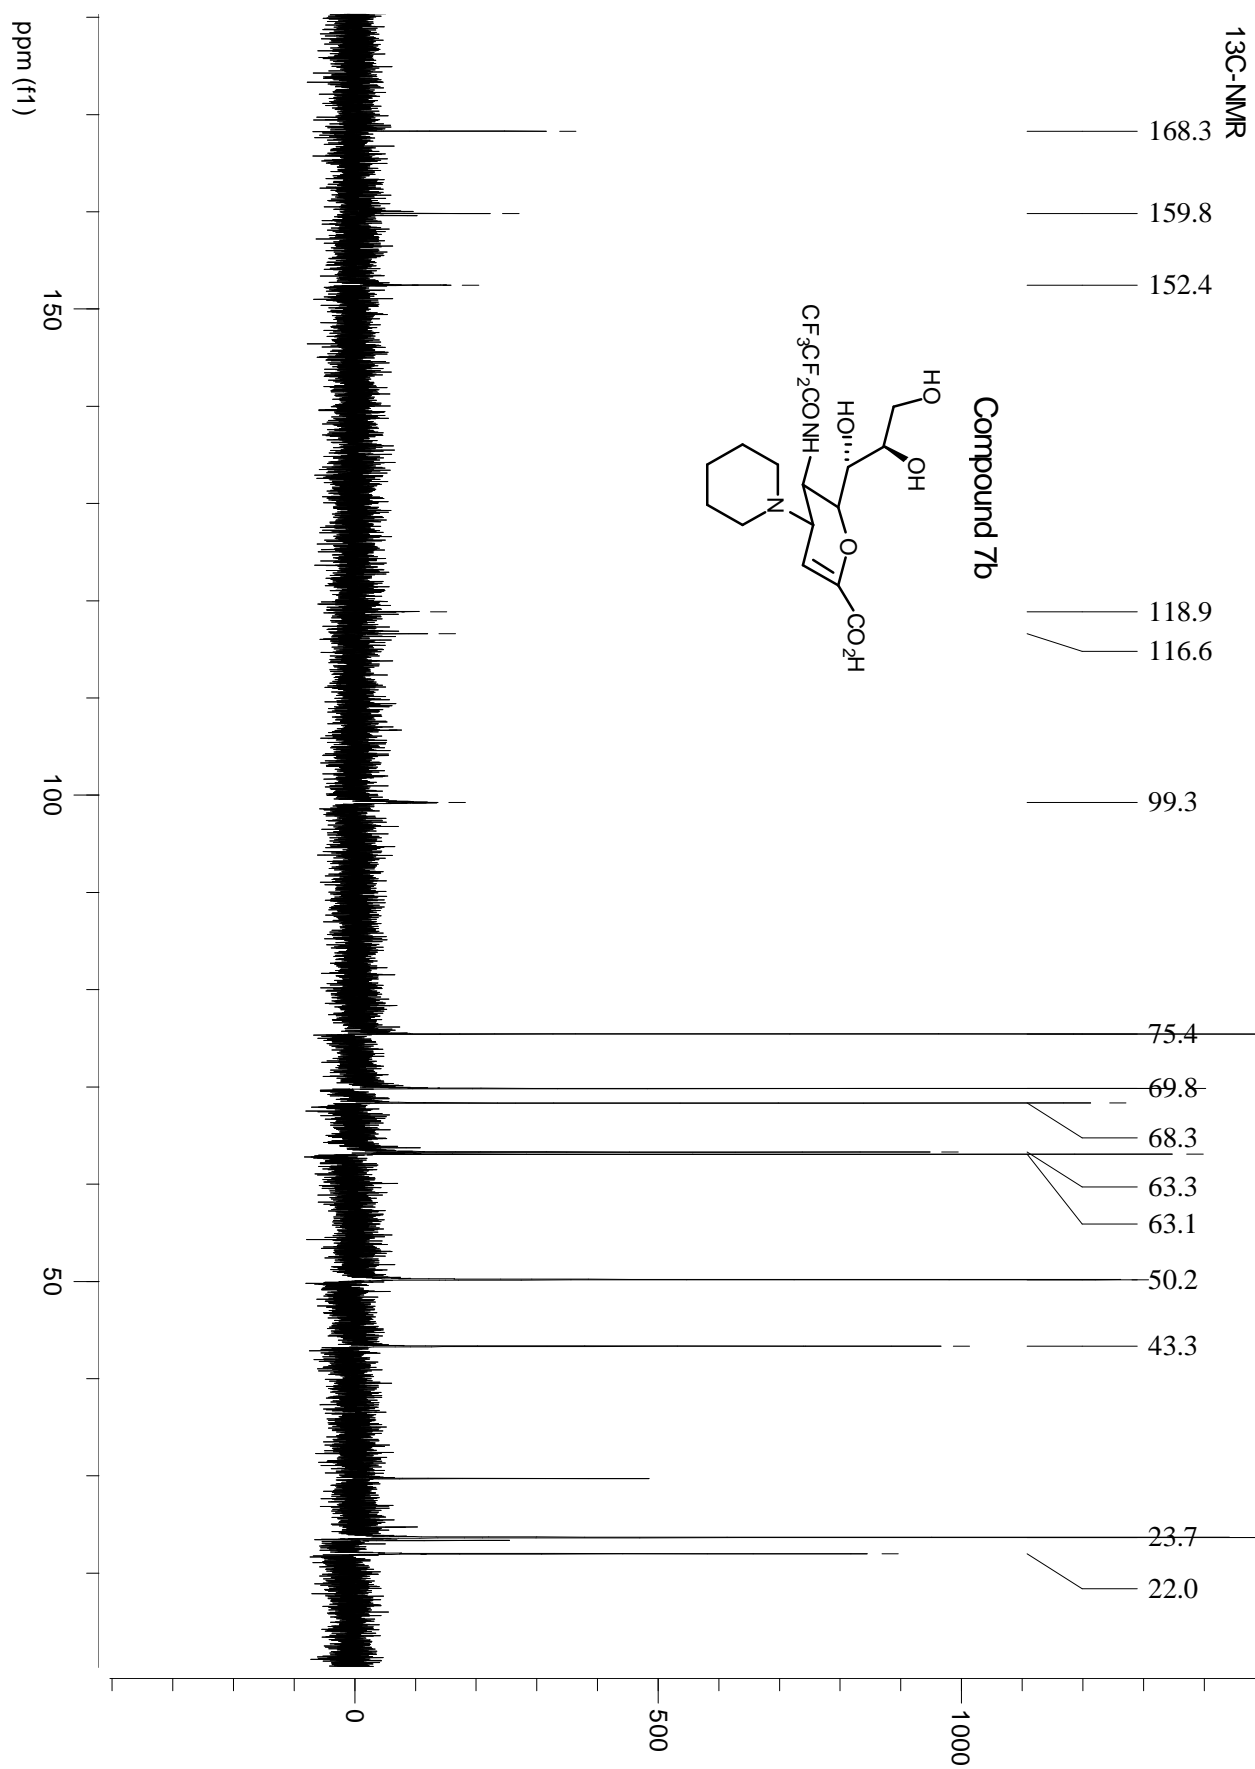

<sup>1</sup>H NMR

Compound 6c

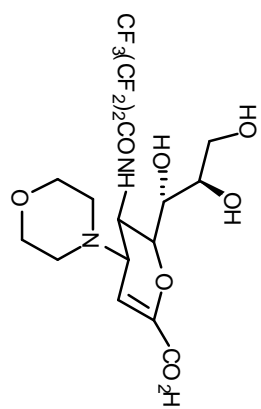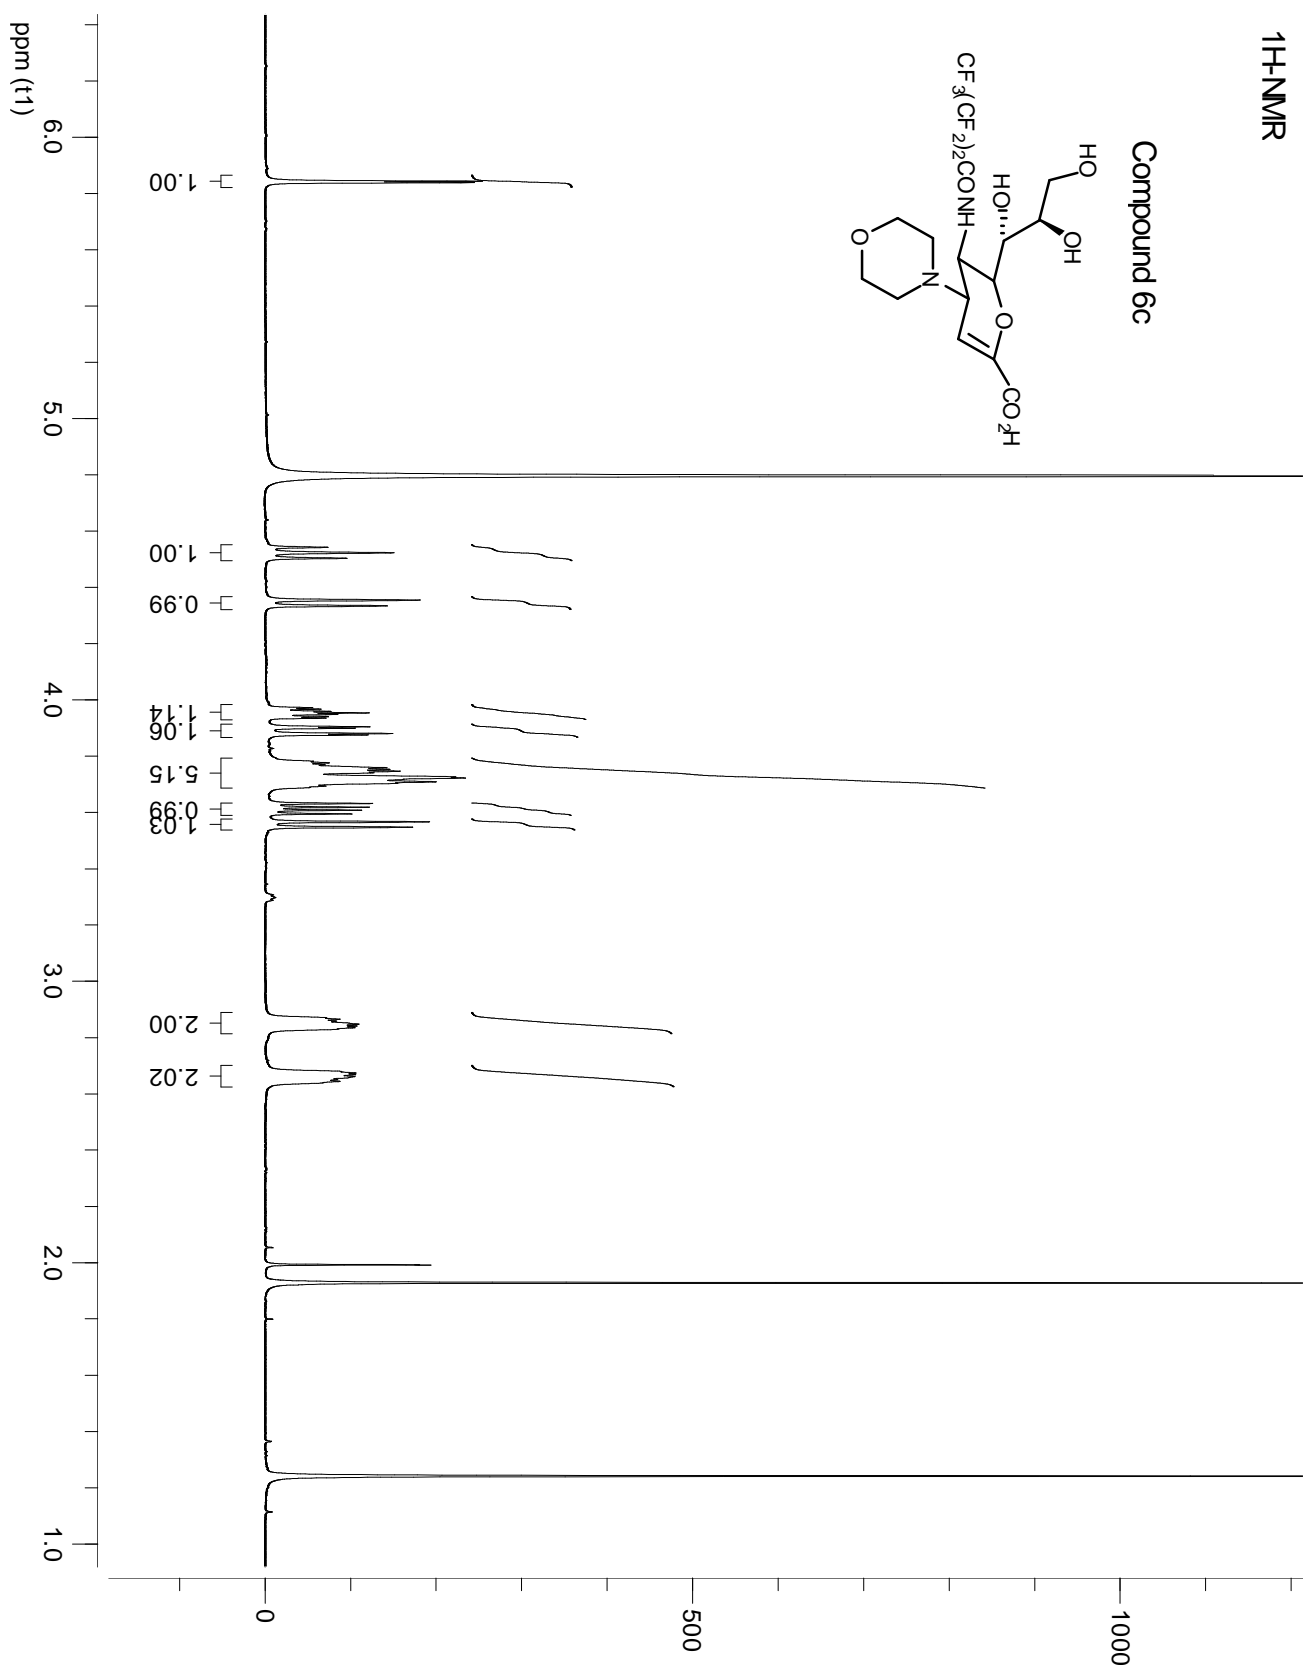

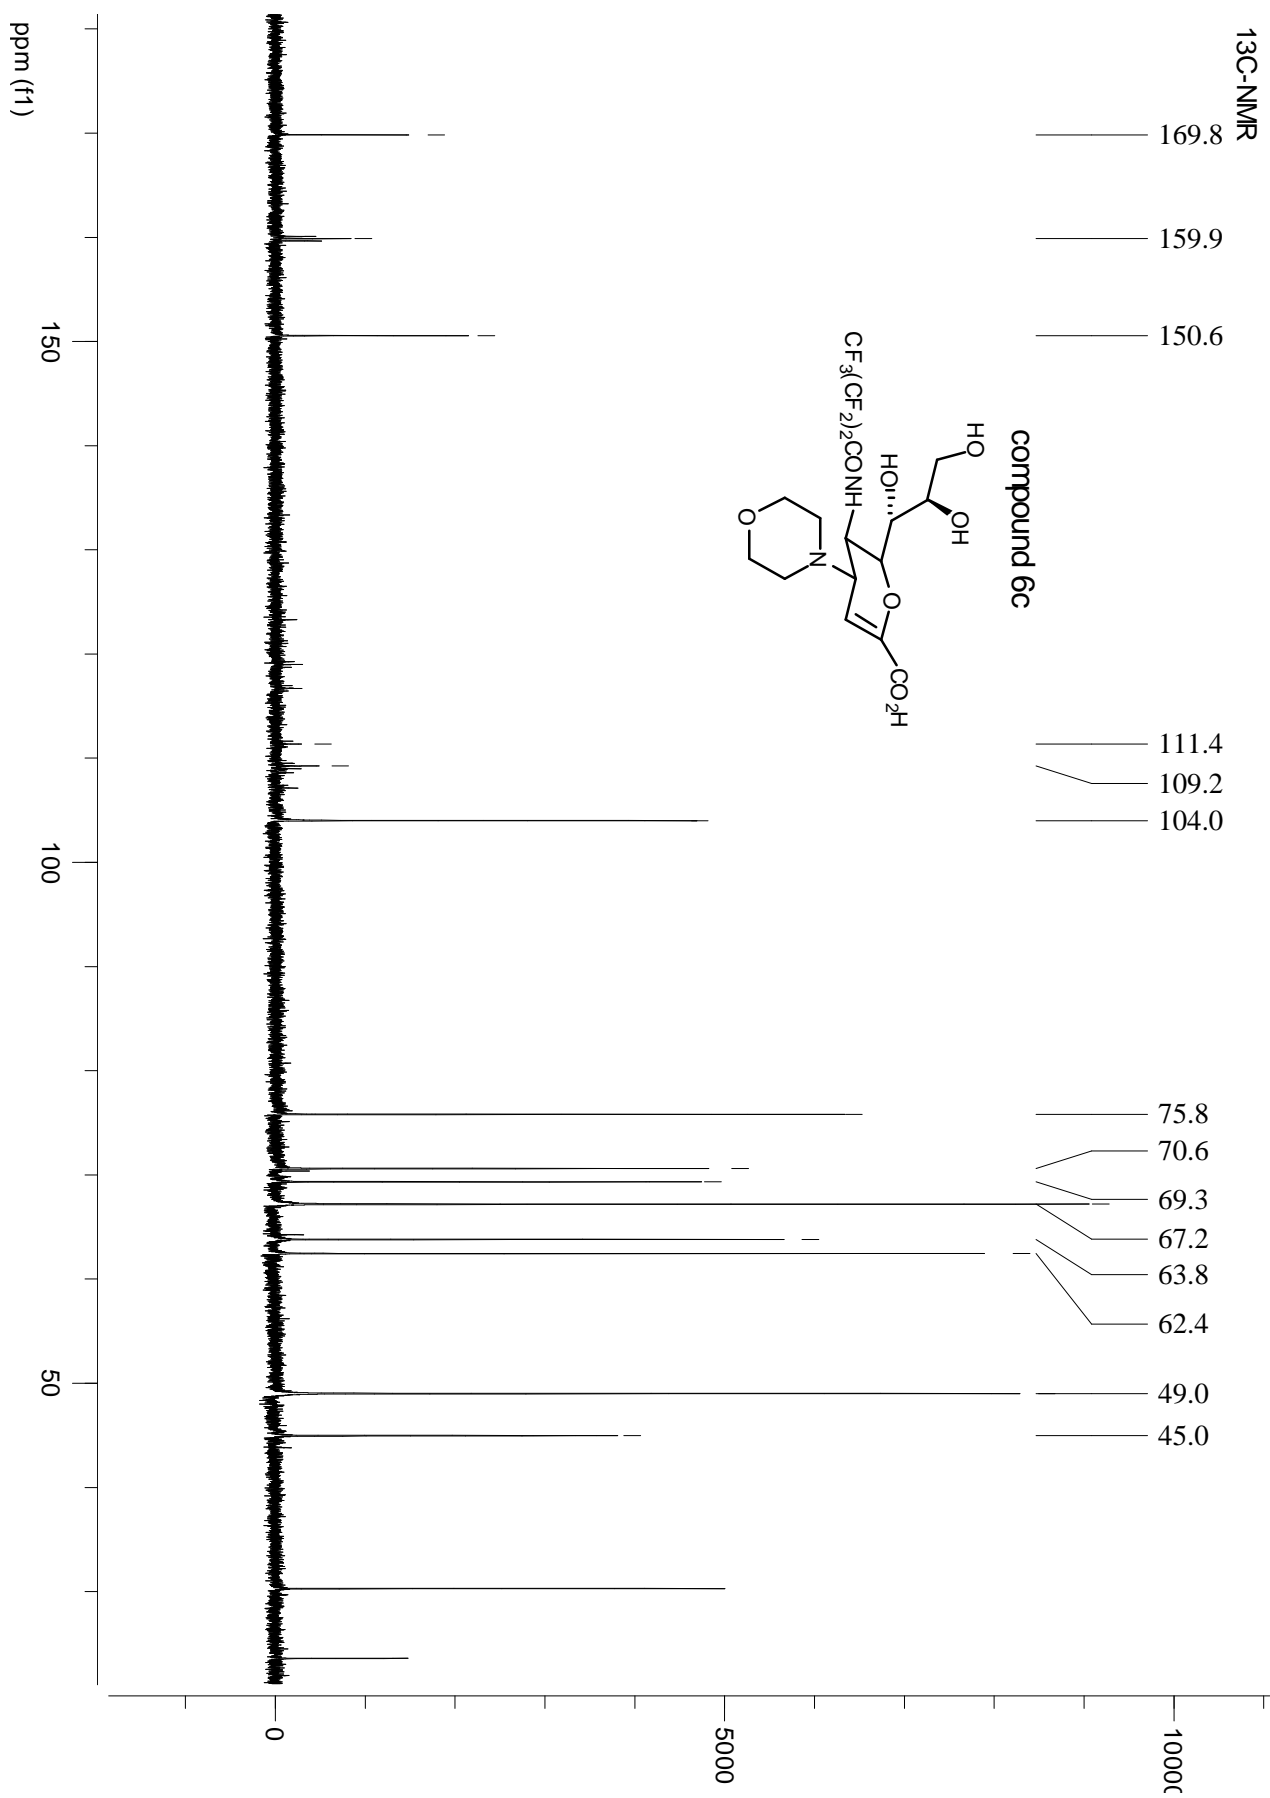

<sup>1</sup>H-NMR

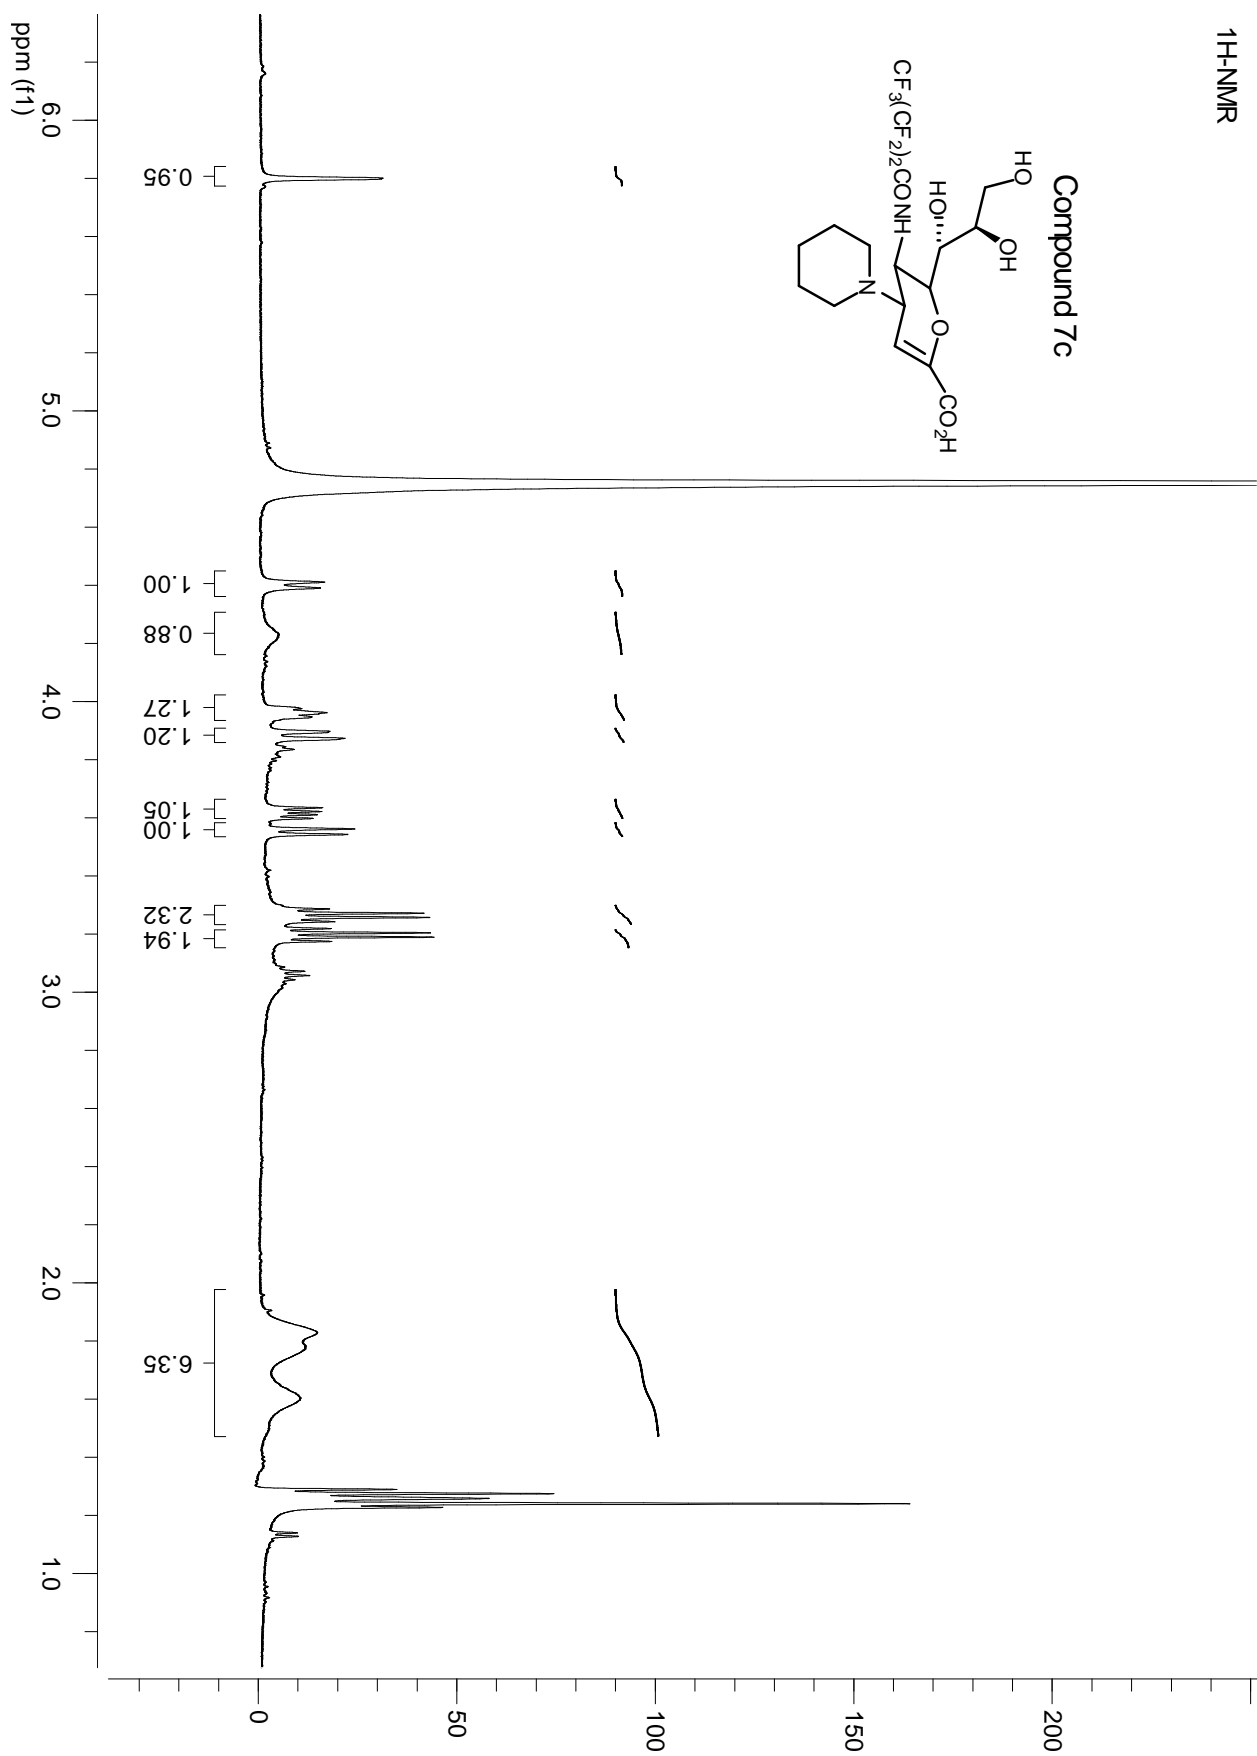

S-48



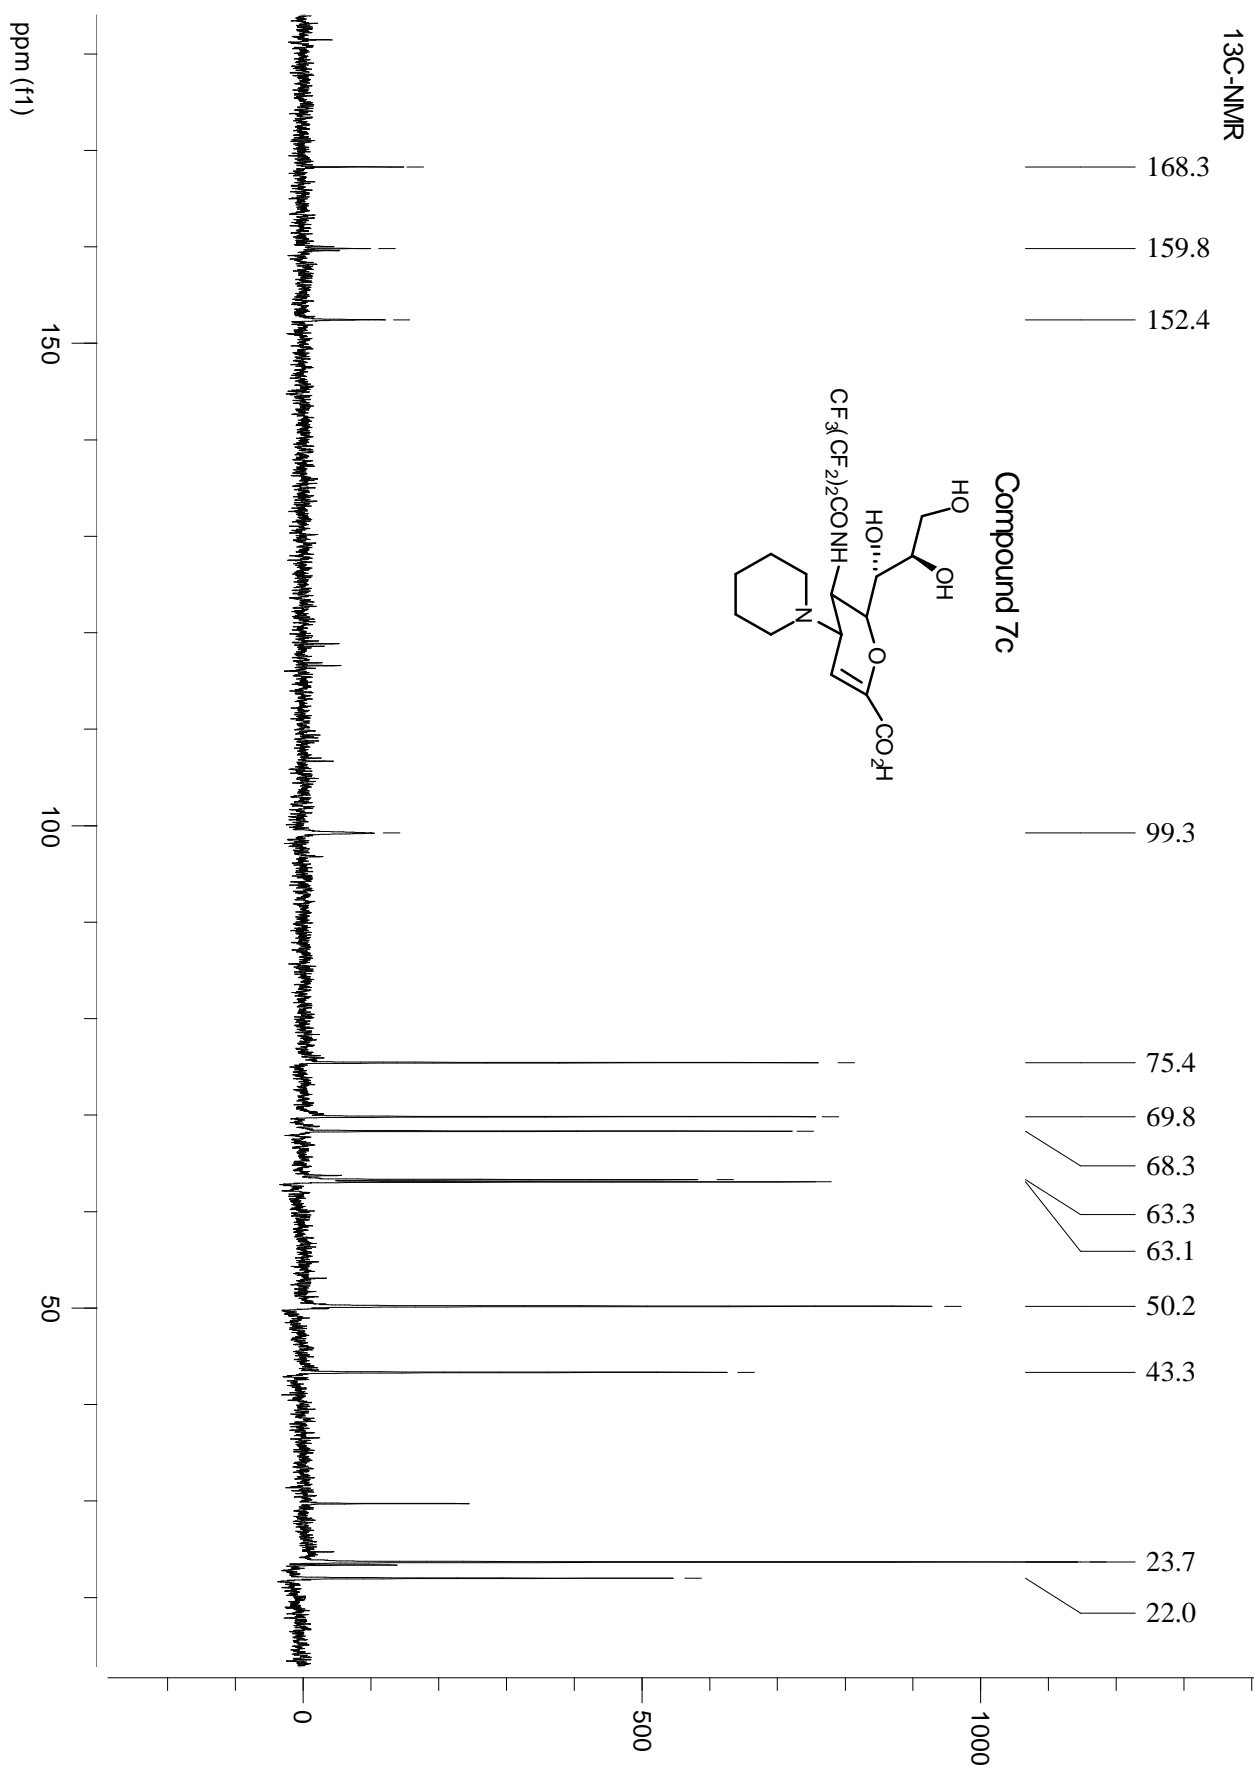

Supplement: c2ob07015d.pdf [file c2ob07015d.pdf]
